# Supplementary material for: Insulin-Like Growth Factor-1 Supplementation Promotes Brain Maturation in Preterm Pigs
Source: eNeuro. 2023 Apr 13;10(4):ENEURO.0430-22.2023. doi: 10.1523/ENEURO.0430-22.2023 (PMC10112548; doi:10.1523/ENEURO.0430-22.2023)
Supplement: Figure 6-2 — DEGs between the control and IGF-1 groups at postnatal day 5 identified by RNA-seq analysis. Listed are all identified porcine genes with corresponding location, the (base 2) log of the fold change, the uncorrected p value and FDR-adjusted p value (padj). Download Figure 6-2, XLS file. [file enu-eN-NWR-0430-22-s06.xls]

## Sheet: Sheet 1
ENSID	GeneName	GeneDescription	baseMean	log2FoldChange	pvalue	padj
ENSSSCG00000035080	RPL23A	ribosomal protein L23a	474.148	0.554963	2.78842e-06	0.0418959
ENSSSCG00000009442	CNMD	chondromodulin	103.78	-0.789688	7.28734e-06	0.0547462
ENSSSCG00000009098	QRFPR	pyroglutamylated RFamide peptide receptor	4.94782	-2.57627	1.51514e-05	0.0758834
ENSSSCG00000020963	EPDR1	ependymin related 1	1046.02	0.371831	5.88506e-05	0.221058
ENSSSCG00000008565	FAM166C	family with sequence similarity 166 member C	29.9023	-0.729056	0.000159939	0.480617
ENSSSCG00000038190	MPST	mercaptopyruvate sulfurtransferase	115.036	-0.578379	0.000262356	0.563129
ENSSSCG00000049238	EDDM13	epididymal protein 13	355.329	0.522973	0.000229695	0.563129
ENSSSCG00000003199	AP2A1	adaptor related protein complex 2 subunit alpha 1	5926.53	0.155714	0.000556829	0.625233
ENSSSCG00000003493	CAPZB	capping actin protein of muscle Z-line subunit beta	2226.46	0.210939	0.00054654	0.625233
ENSSSCG00000012918	GRK2	G protein-coupled receptor kinase 2	4394.54	0.177011	0.000665805	0.625233
ENSSSCG00000013381	RPS13	ribosomal protein S13	118.799	0.551248	0.000639824	0.625233
ENSSSCG00000015631	GRB10	growth factor receptor bound protein 10	220.976	-0.299503	0.000608799	0.625233
ENSSSCG00000028202	RANGAP1	Ran GTPase activating protein 1	2804.39	0.22252	0.000596113	0.625233
ENSSSCG00000034313	SELENOW	selenoprotein W	67.1617	0.724934	0.000653843	0.625233
ENSSSCG00000034924	JRKL	JRK like	130.509	-0.354825	0.000439498	0.625233
ENSSSCG00000036967	ARL8A	ADP ribosylation factor like GTPase 8A	4951.87	0.116843	0.000439552	0.625233
ENSSSCG00000016747	NUDCD3	NudC domain containing 3	4354.67	0.154143	0.000797694	0.665853
ENSSSCG00000022722	CARMIL2	capping protein regulator and myosin 1 linker 2	1302.87	0.303002	0.000796325	0.665853
ENSSSCG00000006011	SLC30A8	solute carrier family 30 member 8	9.94743	1.11482	0.00113077	0.679591
ENSSSCG00000008446	SIX2	SIX homeobox 2	7.7564	1.27576	0.00111695	0.679591
ENSSSCG00000011254	XYLB	xylulokinase	34.1141	0.757439	0.00105347	0.679591
ENSSSCG00000012844	SLC25A22	solute carrier family 25 member 22	7762.59	0.195639	0.00102983	0.679591
ENSSSCG00000015249	ADAMTS8	ADAM metallopeptidase with thrombospondin type 1 motif 8	681.219	0.449946	0.00112974	0.679591
ENSSSCG00000023686	TTR	transthyretin	238.283	-1.93554	0.00102465	0.679591
ENSSSCG00000033199	TAFA4	TAFA chemokine like family member 4	63.6292	-0.594594	0.000982824	0.679591
ENSSSCG00000027541	TMEM198	transmembrane protein 198	880.022	0.174466	0.00122712	0.682869
ENSSSCG00000039494	NDUFC2	NADH:ubiquinone oxidoreductase subunit C2	375.105	0.418962	0.00120207	0.682869
ENSSSCG00000026590	HGH1	HGH1 homolog	456.588	0.243406	0.00132399	0.710464
ENSSSCG00000037405	SNORD36	Small nucleolar RNA SNORD36	6.13993	1.2815	0.00138258	0.716317
ENSSSCG00000015285	LRRN2	leucine rich repeat neuronal 2	1950.04	0.179107	0.00148832	0.7454
ENSSSCG00000006893	BCAR3	BCAR3 adaptor protein, NSP family member	253.655	-0.220996	0.00173205	0.788609
ENSSSCG00000011364	NCKIPSD	NCK interacting protein with SH3 domain	419.337	0.219008	0.00170974	0.788609
ENSSSCG00000014959	PIWIL4	piwi like RNA-mediated gene silencing 4	19.4718	-0.925811	0.00169021	0.788609
ENSSSCG00000003170	SLC17A7	solute carrier family 17 member 7	20520.6	0.194599	0.00187999	0.830791
ENSSSCG00000009929	TRPV4	transient receptor potential cation channel subfamily V member 4	3.06471	-1.78788	0.00196795	0.834952
ENSSSCG00000013936	NDUFA13	NADH:ubiquinone oxidoreductase subunit A13	468.022	0.350643	0.00205612	0.834952
ENSSSCG00000022896	CRMP1	collapsin response mediator protein 1	13050.4	0.187513	0.00204549	0.834952
ENSSSCG00000017489	PSMD3	proteasome 26S subunit, non-ATPase 3	3229.95	0.15259	0.00218833	0.865256
ENSSSCG00000003983	SMAP2	small ArfGAP2	4172.97	0.105896	0.00227905	0.878017
ENSSSCG00000000240	KRT85	keratin, type II cuticular Hb5	1.19857	-3.11597	0.00273587	0.896462
ENSSSCG00000002781	KCTD19	potassium channel tetramerization domain containing 19	7.12765	-1.28468	0.00375888	0.896462
ENSSSCG00000004886	CDH7	cadherin 7	257.615	-0.340002	0.00331324	0.896462
ENSSSCG00000004996	KLHL28	kelch like family member 28	472.902	-0.189382	0.00248155	0.896462
ENSSSCG00000005641	DNM1	dynamin 1	13604.2	0.176096	0.00280906	0.896462
ENSSSCG00000006729	TENT5C	terminal nucleotidyltransferase 5C	38.3452	-0.527188	0.00301248	0.896462
ENSSSCG00000009010	ARFIP1	ADP ribosylation factor interacting protein 1	389.019	-0.216512	0.00263924	0.896462
ENSSSCG00000009434	RGCC	regulator of cell cycle	827.963	-0.253907	0.0034725	0.896462
ENSSSCG00000010533	PYROXD2	pyridine nucleotide-disulphide oxidoreductase domain 2	64.347	-0.668776	0.00346969	0.896462
ENSSSCG00000011575	ATG7	autophagy related 7	480.37	0.185375	0.00262708	0.896462
ENSSSCG00000012276	SYN1	synapsin I	7403.71	0.171851	0.00319103	0.896462
ENSSSCG00000014570	NRIP3	TMEM9 domain family member B	1098.85	0.427325	0.00366841	0.896462
ENSSSCG00000014725	HBB	hemoglobin, beta	43.5741	1.92145	0.00304108	0.896462
ENSSSCG00000015266	FMO4	flavin containing dimethylaniline monoxygenase 4	33.5247	-0.560908	0.00316049	0.896462
ENSSSCG00000016799	CDH12	cadherin 12	193.996	0.319648	0.00319483	0.896462
ENSSSCG00000018053	MED9	mediator complex subunit 9	1320.84	0.172788	0.00343491	0.896462
ENSSSCG00000018086	ND4L	NADH dehydrogenase subunit 4L	5078.53	0.288403	0.00344429	0.896462
ENSSSCG00000020749	KCNAB2	potassium voltage-gated channel subfamily A regulatory beta subunit 2	4778.97	0.191024	0.00355392	0.896462
ENSSSCG00000022656	SRFBP1	serum response factor binding protein 1	191.952	-0.196912	0.00364851	0.896462
ENSSSCG00000023296	CENPE	centromere protein E	80.5175	-0.806764	0.00369925	0.896462
ENSSSCG00000029034	COX4I1	cytochrome c oxidase subunit 4 isoform 1, mitochondrial	370.41	0.559494	0.00351218	0.896462
ENSSSCG00000032397	LBR	lamin B receptor	190.42	-0.209978	0.00334861	0.896462
ENSSSCG00000038853	GPR137B	G protein-coupled receptor 137B	392.893	-0.207404	0.00341059	0.896462
ENSSSCG00000040401	EEF1A2	eukaryotic translation elongation factor 1 alpha 2	32115	0.225944	0.00362391	0.896462
ENSSSCG00000020992	IGSF21	immunoglobin superfamily member 21	2293.53	0.204627	0.00382872	0.898853
ENSSSCG00000004928	CILP	cartilage intermediate layer protein	11.5507	-0.856593	0.0043079	0.903283
ENSSSCG00000006531	EFNA3	ephrin A3	1181.27	0.21301	0.00403879	0.903283
ENSSSCG00000007172	TMC2	transmembrane channel like 2	3.15915	2.13164	0.00429773	0.903283
ENSSSCG00000008122	ADRA2B	adrenoceptor alpha 2B	67.1438	-0.417949	0.00420835	0.903283
ENSSSCG00000010840	RGS7	regulator of G protein signaling 7	1635.61	0.196702	0.00416098	0.903283
ENSSSCG00000014577	TMEM9B	TMEM9 domain family member B	3864.3	0.148237	0.00432854	0.903283
ENSSSCG00000017929	RNASEK	ribonuclease K	210.24	0.376565	0.00403429	0.903283
ENSSSCG00000022815	PYGB	glycogen phosphorylase B	5515.31	0.162845	0.00392167	0.903283
ENSSSCG00000004192	CCN2	cellular communication network factor 2	839.488	-0.412832	0.00460838	0.935689
ENSSSCG00000015271	PRELP	proline and arginine rich end leucine rich repeat protein	113.046	-0.612656	0.00459077	0.935689
ENSSSCG00000007842	SDR42E2	short chain dehydrogenase/reductase family 42E, member 2	201.006	-0.504715	0.0048936	0.94139
ENSSSCG00000017215	SLC16A5	solute carrier family 16 member 5	65.1717	-0.363575	0.00492771	0.94139
ENSSSCG00000030421	GDI1	GDP dissociation inhibitor 1	18441.2	0.114274	0.00488506	0.94139
ENSSSCG00000031970	RASSF5	Ras association domain family member 5	327.52	0.258936	0.00476423	0.94139
ENSSSCG00000037070	GRID2IP	Grid2 interacting protein	72.0707	0.634655	0.00494974	0.94139
ENSSSCG00000009164	CISD2	CDGSH iron sulfur domain 2	218.008	0.254715	0.00504235	0.947017
ENSSSCG00000007636	GJC3	gap junction protein gamma 3	107.389	-0.396838	0.00603334	0.950468
ENSSSCG00000008648	RSAD2	radical S-adenosyl methionine domain containing 2	81.7118	-2.46302	0.00615815	0.950468
ENSSSCG00000009169	SLC39A8	solute carrier family 39 member 8	20.0723	-0.701891	0.00552586	0.950468
ENSSSCG00000011640	TF	transferrin	311.749	-0.7754	0.00634003	0.950468
ENSSSCG00000012117	PRPS2	phosphoribosyl pyrophosphate synthetase 2	963.754	0.16403	0.00611108	0.950468
ENSSSCG00000013771	PRKACA	protein kinase cAMP-activated catalytic subunit alpha	2218.12	0.125965	0.00544298	0.950468
ENSSSCG00000014335	REEP2	receptor accessory protein 2	3646.82	0.152205	0.00529025	0.950468
ENSSSCG00000017777	FLOT2	flotillin 2	3018.35	0.131833	0.0057369	0.950468
ENSSSCG00000023362	RHBDF2	rhomboid 5 homolog 2	41.1329	-0.829895	0.0059658	0.950468
ENSSSCG00000025894	ssc-mir-1271	ssc-mir-1271	1.73299	-2.48125	0.00581596	0.950468
ENSSSCG00000028123	VPS26B	VPS26, retromer complex component B	3536.1	0.147864	0.00570762	0.950468
ENSSSCG00000031452	C14orf93	chromosome 7 C14orf93 homolog	231.034	0.266196	0.00593037	0.950468
ENSSSCG00000032332	SOCS4	suppressor of cytokine signaling 4	415.747	-0.182819	0.0062714	0.950468
ENSSSCG00000032692	SPIN3	spindlin family member 3	212.134	-1.17921	0.00602232	0.950468
ENSSSCG00000032821	FRAT1	FRAT regulator of WNT signaling pathway 1	23.0945	0.682448	0.00616276	0.950468
ENSSSCG00000033236	SMIM18	small integral membrane protein 18	311.585	0.302225	0.00620303	0.950468
ENSSSCG00000037733	TRIQK	triple QxxK/R motif containing	115.952	-0.37355	0.00598603	0.950468
ENSSSCG00000038323	ACTN3	actinin alpha 3	17.7231	0.635145	0.00638917	0.950468
ENSSSCG00000038801	NPNT	nephronectin	1694.1	0.409854	0.00585928	0.950468
ENSSSCG00000039501	NEUROD6	neuronal differentiation 6	2776.41	0.263659	0.0051262	0.950468
ENSSSCG00000040432	GPR101	G protein-coupled receptor 101	19.9576	0.951549	0.00579894	0.950468
ENSSSCG00000011737	SERPINI2	serpin family I member 2	39.2829	-0.712228	0.0064573	0.951186
ENSSSCG00000007344	KIAA1755	KIAA1755 ortholog	107.29	-0.318741	0.00653824	0.953758
ENSSSCG00000002456	CHGA	chromogranin A	5920.91	0.186378	0.00689524	0.96668
ENSSSCG00000004602	TEX9	testis expressed 9	51.3119	-0.550053	0.00696506	0.96668
ENSSSCG00000004766	RAD51	RAD51 recombinase	38.1752	-0.462005	0.00701	0.96668
ENSSSCG00000015515	BRINP2	BMP/retinoic acid inducible neural specific 2	1505.04	0.215316	0.00701285	0.96668
ENSSSCG00000026829	MYNN	myoneurin	310.413	-0.165679	0.00693046	0.96668
ENSSSCG00000036893	PTHLH	parathyroid hormone like hormone	81.9445	0.402575	0.00682058	0.96668
ENSSSCG00000000116	POLR2F	RNA polymerase II subunit F	539.578	0.21233	0.00914196	0.976337
ENSSSCG00000000293	ITGA5	integrin subunit alpha 5	84.2881	0.307565	0.0116062	0.976337
ENSSSCG00000000844	NFYB	nuclear transcription factor Y subunit beta	398.699	-0.170191	0.0113212	0.976337
ENSSSCG00000002011	CPNE6	copine 6	8143.56	0.179961	0.0100209	0.976337
ENSSSCG00000003376	PLEKHG5	pleckstrin homology and RhoGEF domain containing G5	1482.06	0.240438	0.00833494	0.976337
ENSSSCG00000003508	KIF17	kinesin family member 17	233.79	0.234394	0.00761594	0.976337
ENSSSCG00000004576	RORA	RAR related orphan receptor A	30.8343	-0.560804	0.00832129	0.976337
ENSSSCG00000004634	AP4E1	adaptor related protein complex 4 subunit epsilon 1	261.529	-0.205386	0.00734592	0.976337
ENSSSCG00000005474	SAL1	salivary lipocalin	93.0485	1.10497	0.010972	0.976337
ENSSSCG00000005619	TOR2A	torsin family 2 member A	268.459	0.193363	0.00874452	0.976337
ENSSSCG00000005781	TARS3	threonyl-tRNA synthetase 3	365.956	0.214852	0.00828602	0.976337
ENSSSCG00000006089	PTDSS1	phosphatidylserine synthase 1	1970.04	0.130862	0.00854979	0.976337
ENSSSCG00000007187	NSFL1C	NSFL1 cofactor	1800.8	0.191796	0.0102017	0.976337
ENSSSCG00000008294	ACTG2	actin gamma 2, smooth muscle	12.1369	-1.53774	0.0112358	0.976337
ENSSSCG00000009202	MMRN1	multimerin 1	4.85319	-1.27842	0.011074	0.976337
ENSSSCG00000009203	SNCA	synuclein alpha	9357.54	0.216526	0.00995931	0.976337
ENSSSCG00000009228	MAPK10	mitogen-activated protein kinase 10	2934.23	0.155099	0.0120828	0.976337
ENSSSCG00000009720	DDX60	DExD/H-box helicase 60	99.1125	-2.02918	0.00839051	0.976337
ENSSSCG00000010585	ACTR1A	actin related protein 1A	6186.44	0.14244	0.0101412	0.976337
ENSSSCG00000010728	CPXM2	carboxypeptidase X, M14 family member 2	76.9658	-0.702917	0.00723914	0.976337
ENSSSCG00000011061	PDSS1	decaprenyl diphosphate synthase subunit 1	51.3634	0.335454	0.0102974	0.976337
ENSSSCG00000011178	CPNE4	copine 4	945.275	0.334264	0.0111761	0.976337
ENSSSCG00000011229	STT3B	STT3 oligosaccharyltransferase complex catalytic subunit B	2015.72	-0.108916	0.00881124	0.976337
ENSSSCG00000011728	IQCJ	IQ motif containing J	30.87	0.64048	0.0119778	0.976337
ENSSSCG00000011746	SKIL	SKI like proto-oncogene	815.82	-0.182688	0.0111768	0.976337
ENSSSCG00000011767	TTC14	tetratricopeptide repeat domain 14	475.675	-0.228902	0.0117475	0.976337
ENSSSCG00000011848	TFRC	transferrin receptor	1504.82	0.232116	0.0116154	0.976337
ENSSSCG00000012004	LIPI	lipase I	3.93988	1.39116	0.0118467	0.976337
ENSSSCG00000012089	ADARB1	adenosine deaminase RNA specific B1	1756.88	0.165966	0.0108251	0.976337
ENSSSCG00000012160	SH3KBP1	SH3 domain containing kinase binding protein 1	787.618	0.165274	0.00908234	0.976337
ENSSSCG00000012904	AIP	aryl hydrocarbon receptor interacting protein	303.475	0.168423	0.0100013	0.976337
ENSSSCG00000013333	BDNF	brain derived neurotrophic factor	338.482	0.280505	0.0111176	0.976337
ENSSSCG00000013401	DKK3	dickkopf WNT signaling pathway inhibitor 3	6446.92	0.164058	0.00739094	0.976337
ENSSSCG00000013490	PIP5K1C	phosphatidylinositol-4-phosphate 5-kinase type 1 gamma	2134.44	0.170052	0.00845712	0.976337
ENSSSCG00000013601	MARCHF2	membrane associated ring-CH-type finger 2	86.5359	0.336551	0.00969765	0.976337
ENSSSCG00000013745	FARSA	phenylalanyl-tRNA synthetase subunit alpha	1396	0.130499	0.0109722	0.976337
ENSSSCG00000013867	SIN3B	SIN3 transcription regulator family member B	2388.57	0.135494	0.00742078	0.976337
ENSSSCG00000014183	SLCO6A1	solute carrier organic anion transporter family member 6A1	5.05417	-1.12281	0.0120324	0.976337
ENSSSCG00000015384	TOMM7	translocase of outer mitochondrial membrane 7	42.8208	0.559994	0.0113419	0.976337
ENSSSCG00000016010	CERKL	ceramide kinase like	10.7737	-0.923265	0.0111167	0.976337
ENSSSCG00000016170	BARD1	BRCA1 associated RING domain 1	70.0118	-0.380254	0.0121832	0.976337
ENSSSCG00000017089	ANXA6	annexin A6	3453.28	0.275707	0.00954568	0.976337
ENSSSCG00000017734	RHBDL3	rhomboid like 3	280.217	0.344632	0.00784768	0.976337
ENSSSCG00000018032	TRPV2	transient receptor potential cation channel subfamily V member 2	489.891	0.265778	0.00881643	0.976337
ENSSSCG00000021397	PODXL2	podocalyxin like 2	2481.26	0.196134	0.0122761	0.976337
ENSSSCG00000022011	NMI	N-myc and STAT interactor	50.9009	-0.722644	0.0121562	0.976337
ENSSSCG00000022643	KATNAL2	katanin catalytic subunit A1 like 2	31.5868	-0.610079	0.00872728	0.976337
ENSSSCG00000024417	ERC2	ELKS/RAB6-interacting/CAST family member 2	1549.94	0.187093	0.0107481	0.976337
ENSSSCG00000024428	CHRNA9	cholinergic receptor nicotinic alpha 9 subunit	26.5063	0.644316	0.00774329	0.976337
ENSSSCG00000024655	PHB2	prohibitin 2	59.9969	0.330578	0.0115249	0.976337
ENSSSCG00000025254	ZNF624	zinc finger protein 624	190.159	-0.2914	0.00912248	0.976337
ENSSSCG00000025610	AGAP3	ArfGAP with GTPase domain, ankyrin repeat and PH domain 3	4278.53	0.12945	0.00817725	0.976337
ENSSSCG00000026849	CCNO	cyclin O	8.94707	1.06232	0.0104647	0.976337
ENSSSCG00000027684	TRIM63	tripartite motif containing 63	78.7568	0.622219	0.00932876	0.976337
ENSSSCG00000027779	TMEM259	transmembrane protein 259	2411.01	0.110925	0.00978332	0.976337
ENSSSCG00000028180	DUSP28	dual specificity phosphatase 28	325.951	-0.175054	0.00915102	0.976337
ENSSSCG00000028346	SAMM50	SAMM50 sorting and assembly machinery component	1483.6	0.157643	0.0115557	0.976337
ENSSSCG00000028694	ATP6V1B2	ATPase H+ transporting V1 subunit B2	7435.85	0.151933	0.01128	0.976337
ENSSSCG00000029763	IFI35	interferon induced protein 35	105.711	-0.665942	0.0106036	0.976337
ENSSSCG00000030149	CAPNS1	calpain small subunit 1	1185.52	0.14843	0.00757214	0.976337
ENSSSCG00000032214	SOCS6	suppressor of cytokine signaling 6	323.465	-0.164689	0.00832743	0.976337
ENSSSCG00000033327	PDGFB	platelet derived growth factor subunit B	732.916	0.227581	0.0104997	0.976337
ENSSSCG00000034058	ARHGDIA	Rho GDP dissociation inhibitor alpha	8223.02	0.132179	0.0120058	0.976337
ENSSSCG00000034776	TAFA5	TAFA chemokine like family member 5	2020.3	0.13498	0.00933711	0.976337
ENSSSCG00000035251	HTR1E	5-hydroxytryptamine receptor 1E	140.762	0.249043	0.0115339	0.976337
ENSSSCG00000035820	TXNDC17	thioredoxin domain containing 17	125.728	0.293876	0.0122814	0.976337
ENSSSCG00000035987	EHD3	EH domain containing 3	1526.36	0.218393	0.0097808	0.976337
ENSSSCG00000036973	RAC3	Rac family small GTPase 3	2033.03	0.248695	0.00826561	0.976337
ENSSSCG00000037056	PPP1R37	protein phosphatase 1 regulatory subunit 37	1710.79	0.143865	0.0109971	0.976337
ENSSSCG00000037106	ECRG4	ECRG4 augurin precursor	33.7453	-0.571179	0.0119297	0.976337
ENSSSCG00000037575	FKBP14	FKBP prolyl isomerase 14	200.599	-0.425469	0.0115112	0.976337
ENSSSCG00000037815	ZC3H12A	zinc finger CCCH-type containing 12A	33.8689	0.454238	0.00893629	0.976337
ENSSSCG00000038112	SPDYC	speedy/RINGO cell cycle regulator family member C	8.89709	-0.890549	0.00994551	0.976337
ENSSSCG00000038487	TMPO	thymopoietin	856.265	-0.166013	0.00803386	0.976337
ENSSSCG00000038489	BHLHA15	basic helix-loop-helix family member a15	6.65455	0.895503	0.0109323	0.976337
ENSSSCG00000038494	LPIN2	lipin 2	2855.72	0.157006	0.0111004	0.976337
ENSSSCG00000038776	GET3	guided entry of tail-anchored proteins factor 3, ATPase	2122.07	0.166564	0.007469	0.976337
ENSSSCG00000038979	ARHGDIG	Rho GDP dissociation inhibitor gamma	906.061	0.270235	0.0112625	0.976337
ENSSSCG00000039261	WSCD2	WSC domain containing 2	1465.38	0.152796	0.0117892	0.976337
ENSSSCG00000039779	CHGB	chromogranin B	9602.35	0.25001	0.0089222	0.976337
ENSSSCG00000002879	GRAMD1A	GRAM domain containing 1A	2630.29	0.13349	0.0130664	0.979382
ENSSSCG00000005040	GNPNAT1	glucosamine-phosphate N-acetyltransferase 1	283.597	-0.213603	0.0125748	0.979382
ENSSSCG00000005065	AP5M1	adaptor related protein complex 5 subunit mu 1	312.66	-0.175151	0.0127205	0.979382
ENSSSCG00000006135	CPNE3	copine 3	629.723	-0.195177	0.0129814	0.979382
ENSSSCG00000006651	ADAMTSL4	ADAMTS like 4	31.2334	-0.640905	0.0126699	0.979382
ENSSSCG00000008937	AMBN	ameloblastin	10.5833	-1.17789	0.0130059	0.979382
ENSSSCG00000009505	MBNL2	muscleblind like splicing regulator 2	1578.46	-0.124898	0.0124523	0.979382
ENSSSCG00000013397	ARNTL	aryl hydrocarbon receptor nuclear translocator like	375.038	-0.246177	0.0124749	0.979382
ENSSSCG00000027571	ARL13B	ADP ribosylation factor like GTPase 13B	181.58	-0.194906	0.0131019	0.979382
ENSSSCG00000028045	MUL1	mitochondrial E3 ubiquitin protein ligase 1	1082.88	0.144357	0.0130682	0.979382
ENSSSCG00000031251	DDA1	DET1 and DDB1 associated 1	342.111	0.238155	0.0130859	0.979382
ENSSSCG00000038521	CHAC1	ChaC glutathione specific gamma-glutamylcyclotransferase 1	606.557	0.288104	0.0130162	0.979382
ENSSSCG00000012773	PNCK	pregnancy up-regulated nonubiquitous CaM kinase	3537.12	0.174733	0.0132722	0.982338
ENSSSCG00000032330	THY1	Thy-1 cell surface antigen	28756.3	0.224737	0.0132692	0.982338
ENSSSCG00000036438	GPX3	glutathione peroxidase 3	246.255	0.341042	0.0134465	0.990358
ENSSSCG00000002776	ATP6V0D1	ATPase H+ transporting V0 subunit d1	6222.06	0.186071	0.013801	0.99215
ENSSSCG00000005671	CRAT	carnitine O-acetyltransferase	1628.79	0.179848	0.0135698	0.99215
ENSSSCG00000032340	CDR2	cerebellar degeneration related protein 2	48.3141	-0.316723	0.0136582	0.99215
ENSSSCG00000034302	SLC12A7	solute carrier family 12 member 7	335.404	-0.325483	0.0137154	0.99215
ENSSSCG00000037734	UBE2M	ubiquitin conjugating enzyme E2 M	3419.93	0.172119	0.0137509	0.99215
ENSSSCG00000009874	RASAL1	RAS protein activator like 1	906.989	0.261205	0.0138955	0.994192
ENSSSCG00000011027	KIF5B	kinesin family member 5B	1945.65	-0.164715	0.0140007	0.996969
ENSSSCG00000000002	GTSE1	G2 and S-phase expressed 1	133.609	-0.0736465	0.647573	0.999608
ENSSSCG00000000003	TTC38	tetratricopeptide repeat domain 38	242.675	-0.104719	0.254518	0.999608
ENSSSCG00000000005	CDPF1	cysteine rich DPF motif domain containing 1	506.678	-0.0130879	0.897465	0.999608
ENSSSCG00000000006	PPARA	peroxisome proliferator activated receptor alpha	52.3311	0.133257	0.524745	0.999608
ENSSSCG00000000007	TRMU	tRNA 5-methylaminomethyl-2-thiouridylate methyltransferase	369.606	-0.0216573	0.781205	0.999608
ENSSSCG00000000010	FBLN1	fibulin 1	260.231	-0.178274	0.252237	0.999608
ENSSSCG00000000014	FAM118A	family with sequence similarity 118 member A	12.2877	0.0631814	0.821751	0.999608
ENSSSCG00000000018	KIAA0930	KIAA0930 ortholog	4491.69	-0.0280957	0.663053	0.999608
ENSSSCG00000000019	NUP50	nucleoporin 50	1195.24	0.0813322	0.116763	0.999608
ENSSSCG00000000020	PHF21B	PHD finger protein 21B	353.647	-0.16667	0.144331	0.999608
ENSSSCG00000000022	RTL6	retrotransposon Gag like 6	2178.65	-0.023231	0.775803	0.999608
ENSSSCG00000000024	PARVB	parvin beta	485.936	-0.178309	0.107503	0.999608
ENSSSCG00000000026	SULT4A1	sulfotransferase family 4A member 1	4971.49	0.178271	0.0475052	0.999608
ENSSSCG00000000029	SCUBE1	signal peptide, CUB domain and EGF like domain containing 1	107.83	0.0382699	0.848797	0.999608
ENSSSCG00000000031	MCAT	malonyl-CoA-acyl carrier protein transacylase	555.355	0.105844	0.239325	0.999608
ENSSSCG00000000033	TSPO	translocator protein	130.404	0.0866851	0.582538	0.999608
ENSSSCG00000000034	TTLL12	tubulin tyrosine ligase like 12	3274.02	0.0904544	0.284438	0.999608
ENSSSCG00000000035	TTLL1	tubulin tyrosine ligase like 1	1582.85	0.154546	0.0176962	0.999608
ENSSSCG00000000036	PACSIN2	protein kinase C and casein kinase substrate in neurons 2	783.248	-0.0875316	0.439804	0.999608
ENSSSCG00000000037	ARFGAP3	ADP ribosylation factor GTPase activating protein 3	533.557	-0.0474853	0.422364	0.999608
ENSSSCG00000000038	CYB5R3	NADH-cytochrome b5 reductase 3-like	1014.42	0.0782995	0.277646	0.999608
ENSSSCG00000000039	POLDIP3	DNA polymerase delta interacting protein 3	1880.69	0.00366965	0.920924	0.999608
ENSSSCG00000000040	SEPTIN3	septin 3	6015.03	0.109397	0.117796	0.999608
ENSSSCG00000000045	NDUFA6	NADH:ubiquinone oxidoreductase subunit A6	1586.49	0.0945812	0.488175	0.999608
ENSSSCG00000000046	CYP2D25	vitamin D3 25-Hydroxylase	10.428	-0.468383	0.177659	0.999608
ENSSSCG00000000050	NAGA	alpha-N-acetylgalactosaminidase	679.226	-0.0193538	0.871764	0.999608
ENSSSCG00000000058	SNU13	small nuclear ribonucleoprotein 13	7789.32	0.0275841	0.744682	0.999608
ENSSSCG00000000059	XRCC6	X-ray repair cross complementing 6	579.26	0.048485	0.472655	0.999608
ENSSSCG00000000061	PMM1	phosphomannomutase 1	928.276	0.000254262	0.997537	0.999608
ENSSSCG00000000062	CSDC2	cold shock domain containing C2	2599.17	0.0835265	0.364068	0.999608
ENSSSCG00000000063	POLR3H	RNA polymerase III subunit H	560.919	0.16327	0.0230368	0.999608
ENSSSCG00000000064	ACO2	aconitase 2	5409.03	0.0998559	0.172629	0.999608
ENSSSCG00000000066	L3MBTL2	L3MBTL histone methyl-lysine binding protein 2	867.205	0.05897	0.247503	0.999608
ENSSSCG00000000067	CHADL	chondroadherin like	230.159	-0.187245	0.170233	0.999608
ENSSSCG00000000068	EP300	E1A binding protein p300	727.028	-0.0666798	0.483894	0.999608
ENSSSCG00000000071	ST13	ST13 Hsp70 interacting protein	3641.24	-0.0430546	0.525905	0.999608
ENSSSCG00000000072	SLC25A17	solute carrier family 25 member 17	1102.47	0.0245033	0.846446	0.999608
ENSSSCG00000000074	MCHR1	melanin concentrating hormone receptor 1	112.912	0.105729	0.522087	0.999608
ENSSSCG00000000075	MRTFA	myocardin related transcription factor A	181.806	0.105931	0.513872	0.999608
ENSSSCG00000000076	SGSM3	small G protein signaling modulator 3	1455.6	0.03806	0.650599	0.999608
ENSSSCG00000000077	ADSL	adenylosuccinate lyase	441.387	-0.0396404	0.525586	0.999608
ENSSSCG00000000078	TNRC6B	trinucleotide repeat containing adaptor 6B	137.734	0.0515478	0.579108	0.999608
ENSSSCG00000000079	FAM83F	family with sequence similarity 83 member F	5.52024	-0.18935	0.677954	0.999608
ENSSSCG00000000080	GRAP2	GRB2 related adaptor protein 2	0.0426914	-0.108881	0.972208	0.999608
ENSSSCG00000000081	ENTHD1	ENTH domain containing 1	1.0315	0.33663	0.740842	0.999608
ENSSSCG00000000082	CACNA1I	calcium voltage-gated channel subunit alpha1 I	726.564	0.170899	0.278747	0.999608
ENSSSCG00000000084	ATF4	activating transcription factor 4	5485.05	0.0891327	0.140255	0.999608
ENSSSCG00000000091	APOBEC3B	apolipoprotein B mRNA editing enzyme catalytic subunit 3B	65.9311	-0.348049	0.11224	0.999608
ENSSSCG00000000092	NPTXR	neuronal pentraxin receptor	8187.95	0.195865	0.0553148	0.999608
ENSSSCG00000000093	DNAL4	dynein axonemal light chain 4	271.878	-0.0197551	0.853666	0.999608
ENSSSCG00000000094	SUN2	Sad1 and UNC84 domain containing 2	632.464	0.0181121	0.825121	0.999608
ENSSSCG00000000095	GTPBP1	GTP binding protein 1	959.863	0.028738	0.580824	0.999608
ENSSSCG00000000103	DMC1	DNA meiotic recombinase 1	10.5538	-0.158979	0.642878	0.999608
ENSSSCG00000000104	DDX17	DEAD-box helicase 17	7473.93	-0.0769931	0.318301	0.999608
ENSSSCG00000000105	KDELR3	KDEL endoplasmic reticulum protein retention receptor 3	74.6224	-0.296632	0.276674	0.999608
ENSSSCG00000000106	KCNJ4	potassium inwardly rectifying channel subfamily J member 4	1189.47	-0.0509779	0.761893	0.999608
ENSSSCG00000000108	TMEM184B	transmembrane protein 184B	1025.97	0.0198526	0.771677	0.999608
ENSSSCG00000000110	PLA2G6	phospholipase A2 group VI	419.603	-0.0194346	0.795755	0.999608
ENSSSCG00000000111	BAIAP2L2	BAR/IMD domain containing adaptor protein 2 like 2	156.451	-0.0394846	0.783852	0.999608
ENSSSCG00000000113	SLC16A8	solute carrier family 16 member 8	18.873	0.277889	0.273744	0.999608
ENSSSCG00000000114	PICK1	protein interacting with PRKCA 1	1559.52	0.08927	0.193876	0.999608
ENSSSCG00000000117	C22orf23	chromosome 5 C22orf23 homolog	194.907	-0.193406	0.239421	0.999608
ENSSSCG00000000118	MICALL1	MICAL like 1	628.12	-0.0761068	0.544828	0.999608
ENSSSCG00000000119	EIF3L	eukaryotic translation initiation factor 3 subunit L	2094.92	0.0385385	0.549449	0.999608
ENSSSCG00000000120	ANKRD54	ankyrin repeat domain 54	334.735	-0.0196486	0.775313	0.999608
ENSSSCG00000000121	GALR3	galanin receptor 3	22.66	0.394585	0.15255	0.999608
ENSSSCG00000000130	CYTH4	cytohesin 4	140.51	0.0419135	0.7854	0.999608
ENSSSCG00000000131	ELFN2	extracellular leucine rich repeat and fibronectin type III domain containing 2	643.663	-0.0335575	0.851021	0.999608
ENSSSCG00000000132	TEX33	testis expressed 33	2.07953	-0.522601	0.43291	0.999608
ENSSSCG00000000133	TST	thiosulfate sulfurtransferase	2722.48	-0.111096	0.373679	0.999608
ENSSSCG00000000135	KCTD17	potassium channel tetramerization domain containing 17	1266.37	0.160953	0.0511421	0.999608
ENSSSCG00000000136	CSF2RB	colony stimulating factor 2 receptor beta common subunit	28.2086	-0.526401	0.0459248	0.999608
ENSSSCG00000000137	NCF4	neutrophil cytosolic factor 4	174.319	-0.187	0.169528	0.999608
ENSSSCG00000000138	PVALB	parvalbumin	249.136	0.338468	0.0798202	0.999608
ENSSSCG00000000139	IFT27	intraflagellar transport 27	350.317	-0.0164797	0.894289	0.999608
ENSSSCG00000000141	EIF3D	eukaryotic translation initiation factor 3 subunit D	2281.02	0.130394	0.121732	0.999608
ENSSSCG00000000142	FOXRED2	FAD dependent oxidoreductase domain containing 2	612.846	0.00352754	0.968074	0.999608
ENSSSCG00000000146	MYH11	myosin heavy chain 11	117.718	-0.336257	0.387657	0.999608
ENSSSCG00000000152	RBFOX2	RNA binding fox-1 homolog 2	1920.62	0.0489665	0.715678	0.999608
ENSSSCG00000000156	FBXO7	F-box protein 7	492.045	0.0643949	0.356204	0.999608
ENSSSCG00000000158	RTCB	RNA 2',3'-cyclic phosphate and 5'-OH ligase	1095.01	0.0909419	0.291975	0.999608
ENSSSCG00000000159	ASCL4	achaete-scute family bHLH transcription factor 4	0.0466985	0.45532	0.884167	0.999608
ENSSSCG00000000160	PRDM4	PR/SET domain 4	378.101	0.0790855	0.286764	0.999608
ENSSSCG00000000161	PWP1	PWP1 homolog, endonuclein	866.812	0.111241	0.209733	0.999608
ENSSSCG00000000162	BTBD11	BTB domain containing 11	233.761	0.0505991	0.71903	0.999608
ENSSSCG00000000164	CRY1	cryptochrome circadian regulator 1	259.499	-0.0589005	0.470508	0.999608
ENSSSCG00000000167	RIC8B	RIC8 guanine nucleotide exchange factor B	610.269	-0.0216104	0.725712	0.999608
ENSSSCG00000000169	POLR3B	RNA polymerase III subunit B	726.482	-0.0427306	0.456513	0.999608
ENSSSCG00000000171	CKAP4	cytoskeleton associated protein 4	236.631	0.0291937	0.842258	0.999608
ENSSSCG00000000174	TEX49	testis expressed 49	2.03136	-0.0906642	0.918206	0.999608
ENSSSCG00000000175	ADCY6	adenylate cyclase 6	1244.57	0.0567662	0.492758	0.999608
ENSSSCG00000000176	DDX23	DEAD-box helicase 23	796.529	0.018756	0.776699	0.999608
ENSSSCG00000000179	CCDC65	coiled-coil domain containing 65	164.559	-0.157422	0.12205	0.999608
ENSSSCG00000000182	WNT10B	Wnt family member 10B	84.793	-0.261872	0.188496	0.999608
ENSSSCG00000000183	WNT1	Wnt family member 1	0.32716	-1.25448	0.589344	0.999608
ENSSSCG00000000184	DDN	dendrin	4800.43	-0.0211432	0.878563	0.999608
ENSSSCG00000000185	PRKAG1	protein kinase AMP-activated non-catalytic subunit gamma 1	360.27	-0.0141074	0.874204	0.999608
ENSSSCG00000000186	RHEBL1	RHEB like 1	40.7527	-0.111915	0.601201	0.999608
ENSSSCG00000000188	DHH	desert hedgehog signaling molecule	5.78252	0.341067	0.535596	0.999608
ENSSSCG00000000189	LMBR1L	limb development membrane protein 1 like	191.091	-0.0809416	0.304899	0.999608
ENSSSCG00000000190	TUBA1B	tubulin alpha 1a	71672.6	0.150471	0.119992	0.999608
ENSSSCG00000000195	PRPH	peripherin	75.4512	0.413723	0.30755	0.999608
ENSSSCG00000000197	C1QL4	complement C1q like 4	16.0562	-0.197297	0.41284	0.999608
ENSSSCG00000000198	DNAJC22	DnaJ heat shock protein family (Hsp40) member C22	2.99112	0.4587	0.451765	0.999608
ENSSSCG00000000199	SPATS2	spermatogenesis associated serine rich 2	532.853	0.0543518	0.457606	0.999608
ENSSSCG00000000202	MCRS1	microspherule protein 1	1111.23	0.0452811	0.514081	0.999608
ENSSSCG00000000203	KCNH3	potassium voltage-gated channel subfamily H member 3	2771.61	-0.0702781	0.537563	0.999608
ENSSSCG00000000204	PRPF40B	pre-mRNA processing factor 40 homolog B	1113.74	0.0136574	0.898608	0.999608
ENSSSCG00000000205	FAM186B	family with sequence similarity 186 member B	116.853	0.136522	0.208356	0.999608
ENSSSCG00000000206	FAIM2	Fas apoptotic inhibitory molecule 2	10552.2	0.129379	0.0172093	0.999608
ENSSSCG00000000209	NCKAP5L	NCK associated protein 5 like	654.053	0.0630619	0.470938	0.999608
ENSSSCG00000000211	AQP5	aquaporin 5	130.491	0.108962	0.32672	0.999608
ENSSSCG00000000212	AQP6	aquaporin 6	1.59322	0.492405	0.610613	0.999608
ENSSSCG00000000214	GPD1	glycerol-3-phosphate dehydrogenase 1	2459.13	-0.0345825	0.812564	0.999608
ENSSSCG00000000215	SMARCD1	SWI/SNF related, matrix associated, actin dependent regulator of chromatin, subfamily d, member 1	836.347	-0.00981587	0.893575	0.999608
ENSSSCG00000000216	ASIC1	acid sensing ion channel subunit 1	1415.81	0.000334751	0.99547	0.999608
ENSSSCG00000000217	RACGAP1	Rac GTPase activating protein 1	244.978	0.0303376	0.718513	0.999608
ENSSSCG00000000228	SCN8A	sodium voltage-gated channel alpha subunit 8	514.183	-0.0485421	0.806616	0.999608
ENSSSCG00000000232	ACVRL1	activin A receptor like type 1	156.771	0.0559665	0.7388	0.999608
ENSSSCG00000000233	ACVR1B	activin A receptor type 1B	649.272	0.0701595	0.447526	0.999608
ENSSSCG00000000234	GRASP	general receptor for phosphoinositides 1 associated scaffold protein	1042.87	-0.0126816	0.904741	0.999608
ENSSSCG00000000236	KRT75	keratin, type II cytoskeletal 75	1.61655	0.375591	0.723139	0.999608
ENSSSCG00000000241	KRT84	keratin 84	0.639529	1.0309	0.456341	0.999608
ENSSSCG00000000248	KRT5	keratin 6A	21.8916	-0.263749	0.354887	0.999608
ENSSSCG00000000249	KRT72	keratin, type II cytoskeletal 72	0.124849	-0.514713	0.869186	0.999608
ENSSSCG00000000251	KRT1	keratin 1	0.0472466	0.346443	0.911734	0.999608
ENSSSCG00000000252	KRT8	keratin 8	10.5372	-0.916636	0.0906895	0.999608
ENSSSCG00000000253	KRT18	keratin 18	4.8625	-0.0662333	0.873517	0.999608
ENSSSCG00000000257	ITGB7	integrin subunit beta 7	13.9497	0.0175607	0.968854	0.999608
ENSSSCG00000000258	RARG	retinoic acid receptor gamma	148.073	-0.0237698	0.841383	0.999608
ENSSSCG00000000259	CSAD	cysteine sulfinic acid decarboxylase	166.845	-0.139981	0.108375	0.999608
ENSSSCG00000000260	SOAT2	sterol O-acyltransferase 2	7.28427	-0.0140008	0.972338	0.999608
ENSSSCG00000000262	SPRYD3	SPRY domain containing 3	4353.7	0.0995144	0.0283404	0.999608
ENSSSCG00000000263	TNS2	tensin 2	803.945	-0.0472437	0.772716	0.999608
ENSSSCG00000000264	MFSD5	major facilitator superfamily domain containing 5	364.322	0.173639	0.0222495	0.999608
ENSSSCG00000000265	ESPL1	extra spindle pole bodies like 1, separase	81.9202	-0.37734	0.146645	0.999608
ENSSSCG00000000267	C12orf10	chromosome 5 C12orf10 homolog	5.51467	-0.0544665	0.901358	0.999608
ENSSSCG00000000268	AAAS	aladin WD repeat nucleoporin	178.436	0.0602235	0.50468	0.999608
ENSSSCG00000000271	AMHR2	anti-Mullerian hormone receptor type 2	57.2503	-0.0911361	0.740734	0.999608
ENSSSCG00000000272	SP1	Sp1 transcription factor	62.0483	-0.0554832	0.805054	0.999608
ENSSSCG00000000273	PRR13	proline rich 13	1622.1	0.270896	0.0343695	0.999608
ENSSSCG00000000274	PCBP2	poly(rC) binding protein 2	4294.91	0.0669947	0.249789	0.999608
ENSSSCG00000000275	MAP3K12	mitogen-activated protein kinase kinase kinase 12	1108.13	0.121313	0.185809	0.999608
ENSSSCG00000000276	TARBP2	TARBP2 subunit of RISC loading complex	713.598	0.0233426	0.792648	0.999608
ENSSSCG00000000277	NPFF	neuropeptide FF-amide peptide precursor	23.3848	-0.256536	0.275738	0.999608
ENSSSCG00000000279	HOXC13	homeobox C13	1.08376	-0.855062	0.448977	0.999608
ENSSSCG00000000288	HNRNPA1	heterogeneous nuclear ribonucleoprotein A1	7082.08	0.0181019	0.743068	0.999608
ENSSSCG00000000289	NFE2	nuclear factor, erythroid 2	0.862859	-0.1155	0.908447	0.999608
ENSSSCG00000000290	COPZ1	COPI coat complex subunit zeta 1	1338.2	0.0760596	0.186019	0.999608
ENSSSCG00000000292	ZNF385A	zinc finger protein 385A	503.535	0.0170973	0.851483	0.999608
ENSSSCG00000000295	NCKAP1L	NCK associated protein 1 like	188.577	0.0157108	0.921883	0.999608
ENSSSCG00000000297	PDE1B	phosphodiesterase 1B	805.973	0.0467179	0.640054	0.999608
ENSSSCG00000000298	PPP1R1A	protein phosphatase 1 regulatory inhibitor subunit 1A	1499.92	0.192947	0.0706413	0.999608
ENSSSCG00000000299	TESPA1	thymocyte expressed, positive selection associated 1	0.56555	-0.683826	0.583546	0.999608
ENSSSCG00000000361	CD63	CD63 molecule	2360.71	-0.00145659	0.984919	0.999608
ENSSSCG00000000362	RDH5	retinol dehydrogenase 5	45.6479	0.0230248	0.905737	0.999608
ENSSSCG00000000363	GDF11	growth differentiation factor 11	122.245	0.060001	0.770363	0.999608
ENSSSCG00000000366	DNAJC14	DnaJ heat shock protein family (Hsp40) member C14	1111.47	-0.0237314	0.613563	0.999608
ENSSSCG00000000368	MMP19	matrix metallopeptidase 19	32.3713	-0.389546	0.162764	0.999608
ENSSSCG00000000370	DGKA	diacylglycerol kinase alpha	292.708	0.0209251	0.810488	0.999608
ENSSSCG00000000371	PMEL	premelanosome protein	5.98033	-0.147063	0.731859	0.999608
ENSSSCG00000000376	SUOX	sulfite oxidase	537.76	0.0983707	0.242787	0.999608
ENSSSCG00000000379	ESYT1	extended synaptotagmin 1	225.727	-0.110553	0.233921	0.999608
ENSSSCG00000000382	SMARCC2	SWI/SNF related, matrix associated, actin dependent regulator of chromatin subfamily c member 2	3156.87	0.0107067	0.827097	0.999608
ENSSSCG00000000383	RNF41	ring finger protein 41	884.157	0.101863	0.081665	0.999608
ENSSSCG00000000384	NABP2	nucleic acid binding protein 2	1121.01	0.10369	0.143079	0.999608
ENSSSCG00000000385	SLC39A5	solute carrier family 39 member 5	30.8168	-0.163065	0.47341	0.999608
ENSSSCG00000000386	ANKRD52	ankyrin repeat domain 52	1191.63	0.102865	0.248143	0.999608
ENSSSCG00000000393	PAN2	poly(A) specific ribonuclease subunit PAN2	499.348	-0.163593	0.154208	0.999608
ENSSSCG00000000396	STAT2	signal transducer and activator of transcription 2	659.153	-0.190359	0.29068	0.999608
ENSSSCG00000000398	APOF	apolipoprotein F	1.71499	-0.432282	0.640238	0.999608
ENSSSCG00000000399	TIMELESS	timeless circadian regulator	25.7265	0.222242	0.33466	0.999608
ENSSSCG00000000400	MIP	major intrinsic protein of lens fiber	0.432454	-1.18526	0.393636	0.999608
ENSSSCG00000000401	GLS2	glutaminase 2	150.883	0.175639	0.0995607	0.999608
ENSSSCG00000000402	RBMS2	RNA binding motif single stranded interacting protein 2	83.3194	-0.108308	0.449747	0.999608
ENSSSCG00000000403	BAZ2A	bromodomain adjacent to zinc finger domain 2A	835.871	-0.033802	0.740242	0.999608
ENSSSCG00000000406	PTGES3	prostaglandin E synthase 3	2950.55	0.00235838	0.973759	0.999608
ENSSSCG00000000411	NAB2	NGFI-A binding protein 2	533.311	0.106794	0.207874	0.999608
ENSSSCG00000000413	MYO1A	myosin IA	0.512831	-0.765935	0.590611	0.999608
ENSSSCG00000000415	SDR9C7	short chain dehydrogenase/reductase family 9C member 7	0.131978	-0.386021	0.901699	0.999608
ENSSSCG00000000418	TAC3	tachykinin precursor 3	116.396	-0.0302352	0.886756	0.999608
ENSSSCG00000000419	RDH16	retinol dehydrogenase 16	31.3662	-0.09367	0.709718	0.999608
ENSSSCG00000000431	MBD6	methyl-CpG binding domain protein 6	455.39	-0.12431	0.379748	0.999608
ENSSSCG00000000433	B4GALNT1	beta-1,4-N-acetyl-galactosaminyltransferase 1	1499.91	0.114164	0.12641	0.999608
ENSSSCG00000000436	PIP4K2C	phosphatidylinositol-5-phosphate 4-kinase type 2 gamma	5.13169	0.280786	0.527391	0.999608
ENSSSCG00000000437	ARHGAP9	Rho GTPase activating protein 9	48.2229	0.129464	0.415033	0.999608
ENSSSCG00000000439	KIF5A	kinesin family member 5A	9871.98	0.01928	0.852119	0.999608
ENSSSCG00000000443	GLI1	GLI family zinc finger 1	31.3115	0.0313077	0.927236	0.999608
ENSSSCG00000000444	DCTN2	dynactin subunit 2	4061.76	0.0795245	0.117017	0.999608
ENSSSCG00000000449	DTX3	deltex E3 ubiquitin ligase 3	2927.54	0.0745341	0.275395	0.999608
ENSSSCG00000000453	ATP23	ATP23 metallopeptidase and ATP synthase assembly factor homolog	242.908	0.00521433	0.956315	0.999608
ENSSSCG00000000455	LRIG3	leucine rich repeats and immunoglobulin like domains 3	145.436	-0.212342	0.278758	0.999608
ENSSSCG00000000456	SLC16A7	solute carrier family 16 member 7	28.1322	-0.0912646	0.648512	0.999608
ENSSSCG00000000457	USP15	ubiquitin specific peptidase 15	331.159	-0.0368952	0.769964	0.999608
ENSSSCG00000000458	MON2	MON2 homolog, regulator of endosome-to-Golgi trafficking	630.457	-0.0111982	0.860823	0.999608
ENSSSCG00000000462	RXYLT1	ribitol xylosyltransferase 1	319.352	-0.0702841	0.407347	0.999608
ENSSSCG00000000464	C12orf56	chromosome 5 C12orf56 homolog	8.26368	-0.0385926	0.904286	0.999608
ENSSSCG00000000466	XPOT	exportin for tRNA	260.46	0.100808	0.415632	0.999608
ENSSSCG00000000469	LEMD3	LEM domain containing 3	640.376	0.00392034	0.947119	0.999608
ENSSSCG00000000475	IRAK3	interleukin 1 receptor associated kinase 3	125.345	0.0323796	0.782907	0.999608
ENSSSCG00000000477	HELB	DNA helicase B	156.909	0.0191916	0.83584	0.999608
ENSSSCG00000000478	GRIP1	glutamate receptor interacting protein 1	518.497	0.00941976	0.928668	0.999608
ENSSSCG00000000482	IL22	interleukin 22	0.495204	-0.396247	0.798819	0.999608
ENSSSCG00000000483	MDM1	Mdm1 nuclear protein	193.747	-0.0907964	0.233884	0.999608
ENSSSCG00000000486	NUP107	nucleoporin 107	332.262	0.00864468	0.905683	0.999608
ENSSSCG00000000487	SLC35E3	solute carrier family 35 member E3	229.409	0.0931667	0.241444	0.999608
ENSSSCG00000000488	MDM2	MDM2 proto-oncogene	348.02	-0.0869537	0.213061	0.999608
ENSSSCG00000000493	FRS2	fibroblast growth factor receptor substrate 2	47.2502	-0.0886212	0.747195	0.999608
ENSSSCG00000000496	CCT2	chaperonin containing TCP1 subunit 2	1.70524	-0.295977	0.756118	0.999608
ENSSSCG00000000499	BEST3	bestrophin 3	2.83761	-1.09381	0.0683285	0.999608
ENSSSCG00000000502	CNOT2	CCR4-NOT transcription complex subunit 2	630.545	-0.00918935	0.830219	0.999608
ENSSSCG00000000504	PTPRB	protein tyrosine phosphatase receptor type B	226.609	0.106718	0.502078	0.999608
ENSSSCG00000000509	ZFC3H1	zinc finger C3H1-type containing	692.793	-0.0579712	0.382273	0.999608
ENSSSCG00000000510	TMEM19	RAB21, member RAS oncogene family	2879.67	-0.00231201	0.962438	0.999608
ENSSSCG00000000512	TBC1D15	TBC1 domain family member 15	446.634	-0.108714	0.245903	0.999608
ENSSSCG00000000515	TRHDE	thyrotropin releasing hormone degrading enzyme	590.136	0.214915	0.180337	0.999608
ENSSSCG00000000516	KCNC2	potassium voltage-gated channel subfamily C member 2	1084.71	0.0797638	0.528188	0.999608
ENSSSCG00000000517	CAPS2	calcyphosine 2	386.816	-0.0383949	0.74343	0.999608
ENSSSCG00000000519	GLIPR1	GLI pathogenesis related 1	385.355	0.0114102	0.903617	0.999608
ENSSSCG00000000521	PHLDA1	pleckstrin homology like domain family A member 1	406.609	-0.226937	0.189455	0.999608
ENSSSCG00000000522	NAP1L1	nucleosome assembly protein 1 like 1	4755.5	-0.0255187	0.615691	0.999608
ENSSSCG00000000523	BBS10	Bardet-Biedl syndrome 10	159.764	-0.0579459	0.538083	0.999608
ENSSSCG00000000527	SYT10	synaptotagmin 10	14.0046	0.325627	0.253581	0.999608
ENSSSCG00000000528	PKP2	plakophilin 2	388.15	0.0715475	0.403874	0.999608
ENSSSCG00000000531	BICD1	BICD cargo adaptor 1	629.329	0.03732	0.667941	0.999608
ENSSSCG00000000534	IPO8	importin 8	597.361	-0.123368	0.0551681	0.999608
ENSSSCG00000000536	ERGIC2	ERGIC and golgi 2	543.918	0.0202313	0.692962	0.999608
ENSSSCG00000000540	OVCH1	ovochymase 1	19.3002	0.0604838	0.786158	0.999608
ENSSSCG00000000541	FAR2	fatty acyl-CoA reductase 2	388.054	0.032141	0.856047	0.999608
ENSSSCG00000000545	KLHL42	kelch like family member 42	126.566	0.0157645	0.901698	0.999608
ENSSSCG00000000546	MANSC4	MANSC domain containing 4	27.1857	-0.275233	0.22111	0.999608
ENSSSCG00000000547	MRPS35	mitochondrial ribosomal protein S35	108.208	0.0661879	0.598619	0.999608
ENSSSCG00000000549	PPFIBP1	PPFIA binding protein 1	566.835	-0.123432	0.162432	0.999608
ENSSSCG00000000550	SMCO2	single-pass membrane protein with coiled-coil domains 2	0.0436175	-0.108881	0.972208	0.999608
ENSSSCG00000000551	ARNTL2	aryl hydrocarbon receptor nuclear translocator like 2	165.94	-0.052474	0.649748	0.999608
ENSSSCG00000000553	TM7SF3	transmembrane 7 superfamily member 3	530.619	-0.0923672	0.174235	0.999608
ENSSSCG00000000554	FGFR1OP2	FGFR1 oncogene partner 2	515.071	0.0256311	0.76559	0.999608
ENSSSCG00000000555	ITPR2	inositol 1,4,5-trisphosphate receptor type 2	200.738	0.0315657	0.828798	0.999608
ENSSSCG00000000559	RASSF8	Ras association domain family member 8	220.548	-0.10725	0.269409	0.999608
ENSSSCG00000000567	SOX5	SRY-box transcription factor 5	47.4799	-0.099083	0.70561	0.999608
ENSSSCG00000000570	C2CD5	C2 calcium dependent domain containing 5	1353.78	-0.030921	0.676999	0.999608
ENSSSCG00000000571	ABCC9	ATP binding cassette subfamily C member 9	36.0012	-0.0965859	0.64724	0.999608
ENSSSCG00000000573	KCNJ8	potassium inwardly rectifying channel subfamily J member 8	109.175	0.0276541	0.776845	0.999608
ENSSSCG00000000577	GYS2	glycogen synthase 2	0.492245	-0.877552	0.571371	0.999608
ENSSSCG00000000579	GOLT1B	golgi transport 1B	518.668	-0.0890462	0.187052	0.999608
ENSSSCG00000000580	RECQL	RecQ like helicase	93.9873	-0.00334245	0.982868	0.999608
ENSSSCG00000000582	IAPP	islet amyloid polypeptide	19.5875	0.0781451	0.818746	0.999608
ENSSSCG00000000583	PYROXD1	pyridine nucleotide-disulphide oxidoreductase domain 1	168.598	-0.0961915	0.323067	0.999608
ENSSSCG00000000584	SLCO1A2	solute carrier organic anion transporter family member 1A2	260.83	-0.211508	0.137166	0.999608
ENSSSCG00000000585	SLCO1C1	solute carrier organic anion transporter family member 1C1	759.483	0.13317	0.121164	0.999608
ENSSSCG00000000587	AEBP2	AE binding protein 2	430.974	-0.0716252	0.283194	0.999608
ENSSSCG00000000588	PLEKHA5	pleckstrin homology domain containing A5	820.668	-0.0927234	0.41632	0.999608
ENSSSCG00000000590	PLCZ1	phospholipase C zeta 1	0.974245	0.132525	0.91121	0.999608
ENSSSCG00000000591	PIK3C2G	phosphatidylinositol-4-phosphate 3-kinase catalytic subunit type 2 gamma	1.94951	0.443306	0.55929	0.999608
ENSSSCG00000000598	SLC15A5	solute carrier family 15 member 5	0.0943877	0.143527	0.963371	0.999608
ENSSSCG00000000599	DERA	deoxyribose-phosphate aldolase	398.141	-0.0621033	0.551706	0.999608
ENSSSCG00000000600	EPS8	epidermal growth factor receptor pathway substrate 8	673.606	0.0264314	0.701103	0.999608
ENSSSCG00000000601	PTPRO	protein tyrosine phosphatase receptor type O	923.293	-0.0551317	0.472149	0.999608
ENSSSCG00000000602	RERG	RAS like estrogen regulated growth inhibitor	194.668	0.193875	0.360455	0.999608
ENSSSCG00000000605	ERP27	endoplasmic reticulum protein 27	0.56886	-0.31701	0.850788	0.999608
ENSSSCG00000000607	ART4	ADP-ribosyltransferase 4 (Dombrock blood group)	1.51459	0.205646	0.8497	0.999608
ENSSSCG00000000610	SMCO3	single-pass membrane protein with coiled-coil domains 3	0.164181	0.146808	0.962523	0.999608
ENSSSCG00000000612	ATF7IP	activating transcription factor 7 interacting protein	795.244	-0.0844445	0.215781	0.999608
ENSSSCG00000000614	GRIN2B	glutamate ionotropic receptor NMDA type subunit 2B	38.3121	-0.0893326	0.626922	0.999608
ENSSSCG00000000619	FAM234B	family with sequence similarity 234 member B	460.615	0.138562	0.447677	0.999608
ENSSSCG00000000623	BCL2L14	BCL2 like 14	6.85777	-0.823136	0.0763129	0.999608
ENSSSCG00000000625	LRP6	LDL receptor related protein 6	109.559	-0.147303	0.344319	0.999608
ENSSSCG00000000629	TP23	Sus scrofa basic proline-rich protein (TP23), mRNA.	0.365914	0.322559	0.871283	0.999608
ENSSSCG00000000633	YBX3	Y-box binding protein 3	430.997	-0.106873	0.393835	0.999608
ENSSSCG00000000634	STYK1	serine/threonine/tyrosine kinase 1	3.35881	0.929166	0.0682047	0.999608
ENSSSCG00000000635	MAGOHB	mago homolog B, exon junction complex subunit	241.069	0.0821897	0.42877	0.999608
ENSSSCG00000000645	GABARAPL1	GABA type A receptor associated protein like 1	8070.77	0.0861122	0.204523	0.999608
ENSSSCG00000000647	OLR1	oxidized low density lipoprotein receptor 1	5.82877	-1.17602	0.0780477	0.999608
ENSSSCG00000000648	CLEC7A	C-type lectin domain containing 7A	0.657795	0.518184	0.709019	0.999608
ENSSSCG00000000649	CLEC1A	C-type lectin domain family 1 member A	12.0524	-0.431602	0.146305	0.999608
ENSSSCG00000000650	CLEC1B	C-type lectin domain family 1 member B	0.352232	-0.907929	0.652842	0.999608
ENSSSCG00000000651	CLEC12B	C-type lectin domain family 12 member B	2.59228	-0.134643	0.826602	0.999608
ENSSSCG00000000653	CD69	CD69 molecule	0.436909	-0.218279	0.889295	0.999608
ENSSSCG00000000656	CLEC2B	C-type lectin domain family 2, member B	19.9983	-0.338571	0.209878	0.999608
ENSSSCG00000000660	A2M	alpha-2-macroglobulin	111.899	0.261941	0.0818159	0.999608
ENSSSCG00000000661	PHC1	polyhomeotic homolog 1	921.383	-0.0523428	0.617623	0.999608
ENSSSCG00000000663	KLRG1	killer cell lectin like receptor G1	0.143712	0.504812	0.87168	0.999608
ENSSSCG00000000664	A2ML1	alpha-2-macroglobulin like 1	67.7181	-0.153471	0.308364	0.999608
ENSSSCG00000000665	RIMKLB	ribosomal modification protein rimK like family member B	1381.05	-0.121051	0.0420299	0.999608
ENSSSCG00000000672	CLSTN3	calsyntenin 3	7052.48	0.18289	0.0491336	0.999608
ENSSSCG00000000679	LRRC23	leucine rich repeat containing 23	24.3392	0.0587677	0.824994	0.999608
ENSSSCG00000000680	GPR162	G protein-coupled receptor 162	4524.63	0.155377	0.0606155	0.999608
ENSSSCG00000000681	P3H3	prolyl 3-hydroxylase 3	260.724	-0.0523024	0.729913	0.999608
ENSSSCG00000000682	GNB3	G protein subunit beta 3	33.3332	0.1324	0.546132	0.999608
ENSSSCG00000000683	CDCA3	cell division cycle associated 3	57.2367	0.0646892	0.700133	0.999608
ENSSSCG00000000684	USP5	ubiquitin specific peptidase 5	3221.95	0.0966323	0.120079	0.999608
ENSSSCG00000000685	TPI1	triosephosphate isomerase 1	13347.3	0.123881	0.162301	0.999608
ENSSSCG00000000687	CD4	CD4 molecule	12.6735	0.109133	0.730879	0.999608
ENSSSCG00000000688	LAG3	lymphocyte activating 3	12.3892	-0.506462	0.0782169	0.999608
ENSSSCG00000000690	MLF2	myeloid leukemia factor 2	5782.09	0.0723166	0.459302	0.999608
ENSSSCG00000000691	COPS7A	COP9 signalosome subunit 7A	1348.35	0.102885	0.136266	0.999608
ENSSSCG00000000692	PIANP	PILR alpha associated neural protein	2270.76	0.0343874	0.716042	0.999608
ENSSSCG00000000693	NCAPD2	non-SMC condensin I complex subunit D2	264.282	-0.110771	0.352948	0.999608
ENSSSCG00000000694	GAPDH	glyceraldehyde-3-phosphate dehydrogenase	1.85619	0.291685	0.700528	0.999608
ENSSSCG00000000695	IFFO1	intermediate filament family orphan 1	812.25	-0.0249135	0.759263	0.999608
ENSSSCG00000000699	LPAR5	lysophosphatidic acid receptor 5	27.1194	0.0681282	0.765524	0.999608
ENSSSCG00000000700	ACRBP	acrosin binding protein	42.296	-0.0508653	0.784845	0.999608
ENSSSCG00000000702	ZNF384	zinc finger protein 384	682.165	-0.021393	0.713113	0.999608
ENSSSCG00000000704	TAPBPL	TAP binding protein like	0.934385	2.76288	0.0311636	0.999608
ENSSSCG00000000705	CD27	CD27 molecule	5.42198	-0.201981	0.655772	0.999608
ENSSSCG00000000706	LTBR	lymphotoxin beta receptor	177.431	-0.124614	0.385755	0.999608
ENSSSCG00000000707	SCNN1A	sodium channel epithelial 1 alpha subunit	8.36238	-0.239157	0.448756	0.999608
ENSSSCG00000000708	TNFRSF1A	TNF receptor superfamily member 1A	608.658	0.00619531	0.946295	0.999608
ENSSSCG00000000709	PLEKHG6	pleckstrin homology and RhoGEF domain containing G6	21.7701	0.206549	0.495257	0.999608
ENSSSCG00000000712	VWF	von Willebrand factor	526.246	0.00769229	0.976146	0.999608
ENSSSCG00000000716	KCNA1	potassium voltage-gated channel subfamily A member 1	126.745	0.241323	0.25097	0.999608
ENSSSCG00000000719	NDUFA9	NADH:ubiquinone oxidoreductase subunit A9	1513.61	0.0703603	0.431381	0.999608
ENSSSCG00000000720	AKAP3	A-kinase anchoring protein 3	147.562	0.00242695	0.982612	0.999608
ENSSSCG00000000721	DYRK4	dual specificity tyrosine phosphorylation regulated kinase 4	13.5051	0.150102	0.604471	0.999608
ENSSSCG00000000722	RAD51AP1	RAD51 associated protein 1	41.6815	0.131547	0.448772	0.999608
ENSSSCG00000000723	C12orf4	chromosome 5 C12orf4 homolog	721.645	-0.0445581	0.404346	0.999608
ENSSSCG00000000728	PARP11	poly(ADP-ribose) polymerase family member 11	2.39168	-0.611437	0.35093	0.999608
ENSSSCG00000000730	PRMT8	protein arginine methyltransferase 8	767.637	0.0912753	0.318411	0.999608
ENSSSCG00000000732	CRACR2A	calcium release activated channel regulator 2A	21.4312	-0.00297941	0.98859	0.999608
ENSSSCG00000000734	TSPAN11	tetraspanin 11	107.125	0.059974	0.736517	0.999608
ENSSSCG00000000735	TSPAN9	tetraspanin 9	521.423	0.0559871	0.486892	0.999608
ENSSSCG00000000736	TEAD4	TEA domain transcription factor 4	31.4448	0.067313	0.73953	0.999608
ENSSSCG00000000737	TULP3	TUB like protein 3	432.968	0.0169963	0.759616	0.999608
ENSSSCG00000000738	RHNO1	RAD9-HUS1-RAD1 interacting nuclear orphan 1	279.047	0.0079755	0.965203	0.999608
ENSSSCG00000000739	FOXM1	forkhead box M1	11.933	-0.275811	0.326591	0.999608
ENSSSCG00000000740	TEX52	testis expressed 52	0.202095	0.214808	0.945168	0.999608
ENSSSCG00000000741	NRIP2	nuclear receptor interacting protein 2	177.329	0.0325829	0.815851	0.999608
ENSSSCG00000000742	ITFG2	integrin alpha FG-GAP repeat containing 2	258.164	0.0432241	0.524105	0.999608
ENSSSCG00000000743	FKBP4	FKBP prolyl isomerase 4	3434.7	0.0869454	0.320671	0.999608
ENSSSCG00000000745	DDX11	DEAD/H-box helicase 11	122.51	0.0376019	0.737187	0.999608
ENSSSCG00000000746	WASHC1	WASH complex subunit 1	502.799	0.13182	0.0413203	0.999608
ENSSSCG00000000748	IQSEC3	IQ motif and Sec7 domain ArfGEF 3	1668.18	0.17901	0.0626588	0.999608
ENSSSCG00000000749	SLC6A12	solute carrier family 6 member 12	248.237	0.102177	0.626046	0.999608
ENSSSCG00000000751	CCDC77	coiled-coil domain containing 77	67.9297	-0.0546842	0.698354	0.999608
ENSSSCG00000000753	WNK1	WNK lysine deficient protein kinase 1	1107.78	-0.030249	0.852926	0.999608
ENSSSCG00000000754	RAD52	RAD52 homolog, DNA repair protein	122.648	-0.0412398	0.715722	0.999608
ENSSSCG00000000755	ERC1	ELKS/RAB6-interacting/CAST family member 1	1444.26	0.0578095	0.518325	0.999608
ENSSSCG00000000757	ADIPOR2	adiponectin receptor 2	983.359	-0.0270638	0.634086	0.999608
ENSSSCG00000000759	WNT5B	Wnt family member 5B	72.889	-0.344495	0.0697239	0.999608
ENSSSCG00000000760	LRTM2	leucine rich repeats and transmembrane domains 2	343.654	0.128107	0.170601	0.999608
ENSSSCG00000000764	HDHD5	haloacid dehalogenase like hydrolase domain containing 5	166.382	-0.0379003	0.721351	0.999608
ENSSSCG00000000765	IL17RA	interleukin 17 receptor A	264.635	0.0577146	0.578687	0.999608
ENSSSCG00000000766	CECR2	cat eye syndrome critical region protein 2	267.107	0.0939162	0.373138	0.999608
ENSSSCG00000000770	MICAL3	microtubule associated monooxygenase, calponin and LIM domain containing 3	2317.39	-0.139324	0.277186	0.999608
ENSSSCG00000000774	USP18	ubiquitin specific peptidase 18	472.434	-1.38561	0.0360297	0.999608
ENSSSCG00000000778	CPNE8	copine 8	226.964	-0.0425946	0.717476	0.999608
ENSSSCG00000000779	KIF21A	kinesin family member 21A	2315.05	-0.0605212	0.448831	0.999608
ENSSSCG00000000781	ABCD2	ATP binding cassette subfamily D member 2	192.449	-0.113874	0.461714	0.999608
ENSSSCG00000000782	C12orf40	chromosome 5 C12orf40 homolog	0.389827	-0.274372	0.859547	0.999608
ENSSSCG00000000783	SLC2A13	solute carrier family 2 member 13	59.3955	-0.283578	0.440433	0.999608
ENSSSCG00000000784	LRRK2	leucine rich repeat kinase 2	205.879	-0.0758656	0.618495	0.999608
ENSSSCG00000000789	CNTN1	contactin 1	9806.48	-0.0121217	0.843335	0.999608
ENSSSCG00000000791	PDZRN4	PDZ domain containing ring finger 4	239.674	0.0062325	0.949812	0.999608
ENSSSCG00000000793	PPHLN1	periphilin 1	497.649	-0.111158	0.066126	0.999608
ENSSSCG00000000795	ADAMTS20	ADAM metallopeptidase with thrombospondin type 1 motif 20	182.621	-0.0855327	0.540519	0.999608
ENSSSCG00000000798	TWF1	twinfilin actin binding protein 1	672.096	-0.094952	0.174633	0.999608
ENSSSCG00000000799	IRAK4	interleukin 1 receptor associated kinase 4	98.2675	-0.0768749	0.534464	0.999608
ENSSSCG00000000800	PUS7L	pseudouridine synthase 7 like	124.429	0.0127493	0.913178	0.999608
ENSSSCG00000000801	TMEM117	transmembrane protein 117	265.065	-0.149633	0.267069	0.999608
ENSSSCG00000000802	NELL2	neural EGFL like 2	11819.8	0.161069	0.0275796	0.999608
ENSSSCG00000000804	ANO6	anoctamin 6	192.304	-0.164096	0.0554493	0.999608
ENSSSCG00000000806	SCAF11	SR-related CTD associated factor 11	650.071	-0.171415	0.0301172	0.999608
ENSSSCG00000000808	SLC38A2	solute carrier family 38 member 2	1343.68	-0.0119291	0.896264	0.999608
ENSSSCG00000000810	AMIGO2	adhesion molecule with Ig like domain 2	295.593	0.0083463	0.950565	0.999608
ENSSSCG00000000811	PCED1B	PC-esterase domain containing 1B	9.3978	-0.233342	0.551218	0.999608
ENSSSCG00000000816	SENP1	SUMO specific peptidase 1	54.3577	-0.00550556	0.968705	0.999608
ENSSSCG00000000837	CHST11	carbohydrate sulfotransferase 11	378.588	0.00771455	0.918249	0.999608
ENSSSCG00000000838	SLC41A2	solute carrier family 41 member 2	469.264	-0.0151583	0.879639	0.999608
ENSSSCG00000000839	ALDH1L2	aldehyde dehydrogenase 1 family member L2	948.854	-0.0350158	0.618491	0.999608
ENSSSCG00000000840	WASHC4	WASH complex subunit 4	545.397	-0.159252	0.041041	0.999608
ENSSSCG00000000841	APPL2	adaptor protein, phosphotyrosine interacting with PH domain and leucine zipper 2	632.593	-0.0488117	0.409626	0.999608
ENSSSCG00000000842	KANSL2	KAT8 regulatory NSL complex subunit 2	540.786	0.0512514	0.349844	0.999608
ENSSSCG00000000843	TXNRD1	thioredoxin reductase 1	960.913	0.0239677	0.80775	0.999608
ENSSSCG00000000846	HCFC2	host cell factor C2	417.479	-0.0176467	0.765899	0.999608
ENSSSCG00000000847	TDG	thymine DNA glycosylase	490.322	-0.0568555	0.505999	0.999608
ENSSSCG00000000848	GLT8D2	glycosyltransferase 8 domain containing 2	96.3705	-0.17227	0.302151	0.999608
ENSSSCG00000000849	HSP90B1	heat shock protein 90 beta family member 1	4788.2	-0.0283725	0.687241	0.999608
ENSSSCG00000000853	NT5DC3	5'-nucleotidase domain containing 3	5175.74	0.0932624	0.28876	0.999608
ENSSSCG00000000856	PAH	phenylalanine hydroxylase	22.4461	-0.199632	0.50044	0.999608
ENSSSCG00000000857	IGF1	insulin like growth factor 1	21.5553	0.058009	0.77806	0.999608
ENSSSCG00000000859	PARPBP	PARP1 binding protein	6.93391	-0.136411	0.730216	0.999608
ENSSSCG00000000860	NUP37	nucleoporin 37	48.6308	-0.0816966	0.576788	0.999608
ENSSSCG00000000862	GNPTAB	N-acetylglucosamine-1-phosphate transferase subunits alpha and beta	2343.28	0.0411125	0.469049	0.999608
ENSSSCG00000000863	SYCP3	synaptonemal complex protein 3	20.7822	-0.245864	0.255899	0.999608
ENSSSCG00000000864	CHPT1	choline phosphotransferase 1	686.768	0.00893287	0.917499	0.999608
ENSSSCG00000000866	MYBPC1	myosin binding protein C, slow type	16.1357	-0.444077	0.0829191	0.999608
ENSSSCG00000000867	SPIC	Spi-C transcription factor	15.3865	0.050655	0.833909	0.999608
ENSSSCG00000000869	UTP20	UTP20 small subunit processome component	172.358	-0.0644451	0.573154	0.999608
ENSSSCG00000000870	ARL1	ADP ribosylation factor like GTPase 1	2556.54	0.0213039	0.685755	0.999608
ENSSSCG00000000871	SLC5A8	solute carrier family 5 member 8	1.09573	0.419043	0.701036	0.999608
ENSSSCG00000000873	ANO4	anoctamin 4	205.125	-0.0254393	0.828511	0.999608
ENSSSCG00000000874	GAS2L3	growth arrest specific 2 like 3	44.8058	-0.307681	0.113099	0.999608
ENSSSCG00000000875	NR1H4	nuclear receptor subfamily 1 group H member 4	4.36131	-0.403871	0.355976	0.999608
ENSSSCG00000000877	SCYL2	SCY1 like pseudokinase 2	604.21	-0.0366345	0.577158	0.999608
ENSSSCG00000000884	APAF1	apoptotic peptidase activating factor 1	694.169	-0.130474	0.155626	0.999608
ENSSSCG00000000886	SLC25A3	solute carrier family 25 member 3	8144.27	0.0943577	0.115486	0.999608
ENSSSCG00000000890	NEDD1	NEDD1 gamma-tubulin ring complex targeting factor	116.14	-0.137403	0.316806	0.999608
ENSSSCG00000000891	LTA4H	leukotriene A4 hydrolase	570.488	0.0884944	0.200918	0.999608
ENSSSCG00000000892	HAL	histidine ammonia-lyase	0.991968	-0.990379	0.317604	0.999608
ENSSSCG00000000893	AMDHD1	amidohydrolase domain containing 1	27.9547	0.171911	0.470746	0.999608
ENSSSCG00000000894	CCDC38	coiled-coil domain containing 38	31.1387	-0.00582949	0.973372	0.999608
ENSSSCG00000000895	SNRPF	small nuclear ribonucleoprotein polypeptide F	53.4984	0.413955	0.0250796	0.999608
ENSSSCG00000000896	NTN4	netrin 4	245.57	-0.23398	0.242867	0.999608
ENSSSCG00000000900	VEZT	vezatin, adherens junctions transmembrane protein	919.738	0.0774795	0.133711	0.999608
ENSSSCG00000000901	FGD6	FYVE, RhoGEF and PH domain containing 6	73.2343	-0.0144712	0.926665	0.999608
ENSSSCG00000000902	NR2C1	nuclear receptor subfamily 2 group C member 1	232.765	-0.0430346	0.605171	0.999608
ENSSSCG00000000906	TMCC3	transmembrane and coiled-coil domain family 3	397.33	-0.0685856	0.478188	0.999608
ENSSSCG00000000907	PLXNC1	plexin C1	962.904	-0.054995	0.622043	0.999608
ENSSSCG00000000910	CRADD	suppressor of cytokine signaling 2	253.633	0.140298	0.166275	0.999608
ENSSSCG00000000915	DCN	decorin	484.101	-0.142187	0.632629	0.999608
ENSSSCG00000000916	LUM	lumican	199.713	0.0391008	0.731424	0.999608
ENSSSCG00000000917	KERA	keratocan	0.496513	-2.04933	0.277918	0.999608
ENSSSCG00000000918	EPYC	epiphycan	0.304156	0.23462	0.909439	0.999608
ENSSSCG00000000920	POC1B	POC1 centriolar protein B	161.097	-0.218635	0.061441	0.999608
ENSSSCG00000000924	C12orf50	chromosome 5 C12orf50 homolog	12.502	0.0117126	0.967425	0.999608
ENSSSCG00000000925	C12orf29	chromosome 5 C12orf29 homolog	620.401	0.00302837	0.967944	0.999608
ENSSSCG00000000926	CEP290	centrosomal protein 290	263.694	-0.0920644	0.244785	0.999608
ENSSSCG00000000927	TMTC3	transmembrane O-mannosyltransferase targeting cadherins 3	99.8615	-0.0461916	0.736174	0.999608
ENSSSCG00000000932	NTS	neurotensin	621.662	-0.168855	0.773404	0.999608
ENSSSCG00000000934	LRRIQ1	leucine rich repeats and IQ motif containing 1	82.6525	-0.151434	0.366963	0.999608
ENSSSCG00000000936	SLC6A15	solute carrier family 6 member 15	773.169	0.0410803	0.702127	0.999608
ENSSSCG00000000939	ACSS3	acyl-CoA synthetase short chain family member 3	703.48	-0.0622535	0.448685	0.999608
ENSSSCG00000000940	PPFIA2	PTPRF interacting protein alpha 2	1559.34	0.110834	0.314193	0.999608
ENSSSCG00000000941	METTL25	methyltransferase like 25	109.985	0.0963919	0.594667	0.999608
ENSSSCG00000000943	OTOGL	otogelin like	44.7379	0.0554838	0.737809	0.999608
ENSSSCG00000000948	SYT1	synaptotagmin 1	16244.5	0.0619308	0.259212	0.999608
ENSSSCG00000000950	E2F7	E2F transcription factor 7	43.0743	-0.260284	0.15391	0.999608
ENSSSCG00000000951	CSRP2	cysteine and glycine rich protein 2	2129.89	0.132405	0.230913	0.999608
ENSSSCG00000000952	ZDHHC17	zinc finger DHHC-type containing 17	1675.15	-0.0302658	0.574953	0.999608
ENSSSCG00000000955	TBC1D22A	TBC1 domain family member 22A	425.656	0.0462647	0.553491	0.999608
ENSSSCG00000000958	DYRK2	dual specificity tyrosine phosphorylation regulated kinase 2	1069.07	-0.000766932	0.992243	0.999608
ENSSSCG00000000963	SYCE3	synaptonemal complex central element protein 3	0.364142	-0.224137	0.886976	0.999608
ENSSSCG00000000964	LMF2	lipase maturation factor 2	1333.75	-0.0209753	0.826268	0.999608
ENSSSCG00000000965	NCAPH2	non-SMC condensin II complex subunit H2	109.28	-0.032306	0.78538	0.999608
ENSSSCG00000000968	SBF1	SET binding factor 1	6101.45	0.0970936	0.0828813	0.999608
ENSSSCG00000000970	PPP6R2	protein phosphatase 6 regulatory subunit 2	1683.18	-0.00970977	0.893088	0.999608
ENSSSCG00000000971	HDAC10	histone deacetylase 10	191.429	-0.0763185	0.64892	0.999608
ENSSSCG00000000972	TUBGCP6	tubulin gamma complex associated protein 6	668.332	0.0355092	0.648507	0.999608
ENSSSCG00000000973	SELENOO	selenoprotein O	1092.13	0.0990082	0.182817	0.999608
ENSSSCG00000000974	TRABD	TraB domain containing	488.698	-0.125033	0.221246	0.999608
ENSSSCG00000000975	PANX2	pannexin 2	1924.85	0.059958	0.480084	0.999608
ENSSSCG00000000978	MLC1	modulator of VRAC current 1	1451.71	0.00269146	0.99103	0.999608
ENSSSCG00000000980	ALG12	ALG12 alpha-1,6-mannosyltransferase	766.939	0.0136076	0.824562	0.999608
ENSSSCG00000000981	CRELD2	cysteine rich with EGF like domains 2	335.091	0.0368777	0.723944	0.999608
ENSSSCG00000000982	TTLL8	tubulin tyrosine ligase like 8	28.3869	-0.253355	0.344288	0.999608
ENSSSCG00000000985	EXOC2	exocyst complex component 2	2456.28	0.0558605	0.342466	0.999608
ENSSSCG00000000991	FOXQ1	forkhead box Q1	45.1391	0.173443	0.451923	0.999608
ENSSSCG00000000994	GMDS	GDP-mannose 4,6-dehydratase	1018.16	0.123847	0.198313	0.999608
ENSSSCG00000000997	PPP1R3G	protein phosphatase 1 regulatory subunit 3G	2.61359	-0.0023697	0.997366	0.999608
ENSSSCG00000000998	RPP40	ribonuclease P/MRP subunit p40	442.068	-0.0231315	0.816324	0.999608
ENSSSCG00000000999	CDYL	chromodomain Y like	184.884	-0.0306194	0.829913	0.999608
ENSSSCG00000001000	ECI2	enoyl-CoA delta isomerase 2	346.436	-0.03109	0.7439	0.999608
ENSSSCG00000001002	PRPF4B	pre-mRNA processing factor 4B	898.343	0.0256318	0.728569	0.999608
ENSSSCG00000001004	SLC22A23	solute carrier family 22 member 23	2151.52	-0.113057	0.290786	0.999608
ENSSSCG00000001008	BPHL	biphenyl hydrolase like	1149.36	0.150045	0.0636312	0.999608
ENSSSCG00000001009	RIPK1	receptor interacting serine/threonine kinase 1	628.784	-0.0395351	0.663064	0.999608
ENSSSCG00000001010	WRNIP1	WRN helicase interacting protein 1	2948.45	0.0584367	0.386265	0.999608
ENSSSCG00000001011	SERPINB1	serpin family B member 1	293.47	-0.183437	0.165185	0.999608
ENSSSCG00000001022	SSR1	signal sequence receptor subunit 1	2526.01	0.0640891	0.316371	0.999608
ENSSSCG00000001024	RIOK1	RIO kinase 1	382.526	-0.0970029	0.339819	0.999608
ENSSSCG00000001025	DSP	desmoplakin	61.7778	-0.356942	0.229298	0.999608
ENSSSCG00000001027	BMP6	bone morphogenetic protein 6	72.6001	-0.00380205	0.97863	0.999608
ENSSSCG00000001033	SLC35B3	solute carrier family 35 member B3	332.118	-0.0971894	0.160644	0.999608
ENSSSCG00000001036	TFAP2A	transcription factor AP-2 alpha	9.08811	0.0592109	0.844551	0.999608
ENSSSCG00000001040	C6orf52	chromosome 7 C6orf52 homolog	0.350824	0.0742545	0.966927	0.999608
ENSSSCG00000001041	PAK1IP1	PAK1 interacting protein 1	432.423	0.0317884	0.785778	0.999608
ENSSSCG00000001042	MAK	male germ cell associated kinase	42.1776	-0.351329	0.215349	0.999608
ENSSSCG00000001045	ELOVL2	ELOVL fatty acid elongase 2	1878.37	0.0285614	0.700432	0.999608
ENSSSCG00000001048	ADTRP	androgen dependent TFPI regulating protein	0.12498	-0.748667	0.810454	0.999608
ENSSSCG00000001049	HIVEP1	HIVEP zinc finger 1	311.716	-0.0064604	0.969606	0.999608
ENSSSCG00000001052	PHACTR1	phosphatase and actin regulator 1	4158.13	0.0922617	0.170133	0.999608
ENSSSCG00000001053	TBC1D7	TBC1 domain family member 7	459.67	0.0652604	0.510841	0.999608
ENSSSCG00000001056	RANBP9	RAN binding protein 9	499.264	0.0317971	0.773808	0.999608
ENSSSCG00000001057	MCUR1	mitochondrial calcium uniporter regulator 1	501.392	0.218541	0.0987957	0.999608
ENSSSCG00000001061	JARID2	jumonji and AT-rich interaction domain containing 2	712.557	-0.0139829	0.817364	0.999608
ENSSSCG00000001062	DTNBP1	dystrobrevin binding protein 1	762.738	0.074843	0.585431	0.999608
ENSSSCG00000001063	MYLIP	myosin regulatory light chain interacting protein	223.702	-0.150366	0.226756	0.999608
ENSSSCG00000001065	ATXN1	ataxin 1	212.08	-0.194861	0.319161	0.999608
ENSSSCG00000001067	STMND1	stathmin domain containing 1	2.95344	-0.538455	0.374313	0.999608
ENSSSCG00000001068	CAP2	cyclase associated actin cytoskeleton regulatory protein 2	2359.95	0.000356382	0.995917	0.999608
ENSSSCG00000001070	FAM8A1	family with sequence similarity 8 member A1	859.717	-0.0280981	0.591911	0.999608
ENSSSCG00000001072	NHLRC1	NHL repeat containing E3 ubiquitin protein ligase 1	51.9556	0.0263624	0.888155	0.999608
ENSSSCG00000001073	TPMT	thiopurine S-methyltransferase	145.264	0.0969386	0.373791	0.999608
ENSSSCG00000001074	KDM1B	lysine demethylase 1B	290.842	0.0507488	0.577045	0.999608
ENSSSCG00000001075	DEK	DEK proto-oncogene	1201.08	-0.105586	0.150367	0.999608
ENSSSCG00000001076	RNF144B	ring finger protein 144B	184.558	-0.179029	0.0897304	0.999608
ENSSSCG00000001078	MBOAT1	membrane bound O-acyltransferase domain containing 1	64.0156	-0.128223	0.598082	0.999608
ENSSSCG00000001080	CDKAL1	CDK5 regulatory subunit associated protein 1 like 1	137.302	0.0409793	0.758538	0.999608
ENSSSCG00000001085	DCDC2	doublecortin domain containing 2	57.5748	-0.33427	0.128341	0.999608
ENSSSCG00000001087	MRS2	magnesium transporter MRS2	323.306	-0.0558016	0.519916	0.999608
ENSSSCG00000001089	GPLD1	glycosylphosphatidylinositol specific phospholipase D1	79.1629	-0.155441	0.370358	0.999608
ENSSSCG00000001090	ALDH5A1	aldehyde dehydrogenase 5 family member A1	1581.27	0.0375935	0.760658	0.999608
ENSSSCG00000001091	KIAA0319	KIAA0319 ortholog	866.068	0.0627566	0.560853	0.999608
ENSSSCG00000001092	TDP2	tyrosyl-DNA phosphodiesterase 2	485.883	-0.0362529	0.554786	0.999608
ENSSSCG00000001095	GMNN	geminin DNA replication inhibitor	215.532	-0.0732727	0.570453	0.999608
ENSSSCG00000001096	ARMH2	armadillo like helical domain containing 2	0.248266	1.10686	0.655147	0.999608
ENSSSCG00000001097	RIPOR2	RHO family interacting cell polarization regulator 2	1979.67	-0.0557216	0.341011	0.999608
ENSSSCG00000001099	CMAH	cytidine monophosphate-N-acetylneuraminic acid hydroxylase	9.15363	-0.0132869	0.974455	0.999608
ENSSSCG00000001100	CARMIL1	capping protein regulator and myosin 1 linker 1	879.527	-0.00518642	0.957869	0.999608
ENSSSCG00000001101	SCGN	secretagogin, EF-hand calcium binding protein	17.6955	0.699414	0.153049	0.999608
ENSSSCG00000001107	SLC17A1	solute carrier family 17 member 1	6.66664	0.0320432	0.947657	0.999608
ENSSSCG00000001131	BTN2A2	butyrophilin subfamily 2 member A2	67.6596	-0.0432367	0.781086	0.999608
ENSSSCG00000001132	BTN1A1	butyrophilin subfamily 1 member A1	20.6635	0.218121	0.52671	0.999608
ENSSSCG00000001137	H1-3	H1.3 linker histone, cluster member	77.4574	-0.183913	0.354259	0.999608
ENSSSCG00000001156	ZNF322	zinc finger protein 322	482.482	-0.0105341	0.850755	0.999608
ENSSSCG00000001164	ZNF184	zinc finger protein 184	365.204	-0.0220121	0.8092	0.999608
ENSSSCG00000001197	ZNF165	zinc finger protein 165	33.5432	-0.0713479	0.679906	0.999608
ENSSSCG00000001201	ZKSCAN8	zinc finger with KRAB and SCAN domains 8	240.008	-0.161577	0.132923	0.999608
ENSSSCG00000001203	ZSCAN9	zinc finger and SCAN domain containing 9	19.762	-0.371042	0.260717	0.999608
ENSSSCG00000001204	ZKSCAN4	zinc finger with KRAB and SCAN domains 4	72.0025	0.0132313	0.924763	0.999608
ENSSSCG00000001205	NKAPL	NFKB activating protein like	54.4243	0.110485	0.4927	0.999608
ENSSSCG00000001206	ZSCAN26	zinc finger and SCAN domain containing 26	93.8635	0.0714795	0.47108	0.999608
ENSSSCG00000001207	PGBD1	piggyBac transposable element derived 1	57.8804	-0.148919	0.332526	0.999608
ENSSSCG00000001209	ZSCAN12	zinc finger and SCAN domain containing 12	156.798	-0.125779	0.303685	0.999608
ENSSSCG00000001213	GPX6	glutathione peroxidase 6	2.35762	0.343673	0.619257	0.999608
ENSSSCG00000001214	GPX5	glutathione peroxidase 5	0.372708	-0.715135	0.683677	0.999608
ENSSSCG00000001216	ZBED9	zinc finger BED-type containing 9	43.6302	-0.0257702	0.880255	0.999608
ENSSSCG00000001233	TRIM26	tripartite motif containing 26	656.826	-0.197303	0.214216	0.999608
ENSSSCG00000001234	TRIM10	tripartite motif containing 10	53.051	0.735611	0.0329673	0.999608
ENSSSCG00000001235	TRIM15	tripartite motif containing 15	4.1785	-0.713008	0.128284	0.999608
ENSSSCG00000001236	TRIM40	tripartite motif containing 40	0.610463	-0.612045	0.602173	0.999608
ENSSSCG00000001242	GABBR1	gamma-aminobutyric acid type B receptor subunit 1	10606.3	0.0608047	0.344472	0.999608
ENSSSCG00000001245	ZNRD1	zinc ribbon domain containing 1	146.297	0.0315823	0.769664	0.999608
ENSSSCG00000001247	ZFP57	ZFP57 zinc finger protein	219.4	-0.270024	0.402666	0.999608
ENSSSCG00000001248	MOG	myelin oligodendrocyte glycoprotein	1418.5	-0.281224	0.365222	0.999608
ENSSSCG00000001252	UBD	ubiquitin D	4.29174	-0.652987	0.268543	0.999608
ENSSSCG00000001253	OR2I1P	olfactory receptor family 2 subfamily I member 1 pseudogene	1.31061	-1.75712	0.12884	0.999608
ENSSSCG00000001342	TRIM39	tripartite motif containing 39	202.112	-0.0437207	0.641808	0.999608
ENSSSCG00000001346	ABCF1	ATP binding cassette subfamily F member 1	1336.54	-0.0078673	0.862949	0.999608
ENSSSCG00000001347	PPP1R10	protein phosphatase 1 regulatory subunit 10	834.079	0.0526978	0.371226	0.999608
ENSSSCG00000001362	MDC1	mediator of DNA damage checkpoint 1	736.349	-0.028447	0.707415	0.999608
ENSSSCG00000001372	GNL1	G protein nucleolar 1 (putative)	2333.1	0.0676493	0.264323	0.999608
ENSSSCG00000001376	DHX16	DEAH-box helicase 16	477.911	-0.0506354	0.550186	0.999608
ENSSSCG00000001379	TUBB	tubulin beta class I	18481.9	0.157315	0.029312	0.999608
ENSSSCG00000001382	DDR1	discoidin domain receptor tyrosine kinase 1	4758.01	-0.0459105	0.650362	0.999608
ENSSSCG00000001384	VARS2	valyl-tRNA synthetase 2, mitochondrial	1112.65	0.0779601	0.334488	0.999608
ENSSSCG00000001388	C6orf15	chromosome 7 C6orf15 homolog	0.14817	0.395934	0.899188	0.999608
ENSSSCG00000001391	CCHCR1	coiled-coil alpha-helical rod protein 1	2.05662	-0.0890301	0.900541	0.999608
ENSSSCG00000001392	TCF19	transcription factor 19	58.6744	0.0634589	0.701144	0.999608
ENSSSCG00000001400	DDX39B	DExD-box helicase 39B	4643.74	-0.0390499	0.387737	0.999608
ENSSSCG00000001401	ATP6V1G2-DDX39B	ATPase H+ transporting V1 subunit G2	3361.57	0.132154	0.13363	0.999608
ENSSSCG00000001402	NFKBIL1	NFKB inhibitor like 1	687.955	0.10488	0.282631	0.999608
ENSSSCG00000001403	LTA	lymphotoxin alpha	5.5247	-0.352991	0.523828	0.999608
ENSSSCG00000001404	TNF	tumor necrosis factor	3.70251	0.205045	0.757151	0.999608
ENSSSCG00000001409	PRRC2A	proline rich coiled-coil 2A	5421.75	0.0482838	0.569724	0.999608
ENSSSCG00000001410	BAG6	BCL2 associated athanogene 6	2634.24	0.00328255	0.937423	0.999608
ENSSSCG00000001411	APOM	apolipoprotein M	54.5393	-0.183834	0.250191	0.999608
ENSSSCG00000001413	GPANK1	G-patch domain and ankyrin repeats 1	563.919	0.0228947	0.784394	0.999608
ENSSSCG00000001418	NEU1	neuraminidase 1	429.223	0.059478	0.567927	0.999608
ENSSSCG00000001419	SLC44A4	solute carrier family 44 member 4	20.8847	-0.0413058	0.893205	0.999608
ENSSSCG00000001420	EHMT2	euchromatic histone lysine methyltransferase 2	2043.35	0.00317659	0.960082	0.999608
ENSSSCG00000001421	ZBTB12	zinc finger and BTB domain containing 12	274.406	-0.0507401	0.570324	0.999608
ENSSSCG00000001422	C2	complement C2	0.137506	0.960136	0.75868	0.999608
ENSSSCG00000001423	NELFE	negative elongation factor complex member E	505.963	0.133673	0.109523	0.999608
ENSSSCG00000001424	SKIV2L	Ski2 like RNA helicase	106.725	-0.16696	0.3072	0.999608
ENSSSCG00000001425	DXO	decapping exoribonuclease	244.076	0.138259	0.170946	0.999608
ENSSSCG00000001426	STK19	serine/threonine kinase 19	538.997	0.0344101	0.686144	0.999608
ENSSSCG00000001427	C4A	complement C4A (Rodgers blood group)	278.658	-0.531968	0.0594182	0.999608
ENSSSCG00000001428	CYP21A2	cytochrome P450, family 21, subfamily A, polypepide 2	1.36573	1.178	0.237131	0.999608
ENSSSCG00000001430	ATF6B	activating transcription factor 6 beta	1399.08	-0.00777772	0.896386	0.999608
ENSSSCG00000001431	FKBPL	FKBP prolyl isomerase like	79.7212	-0.0915606	0.485519	0.999608
ENSSSCG00000001433	PPT2	palmitoyl-protein thioesterase 2	367.176	-0.0607552	0.420464	0.999608
ENSSSCG00000001434	EGFL8	EGF like domain multiple 8	273.575	0.11314	0.190802	0.999608
ENSSSCG00000001435	AGPAT1	1-acylglycerol-3-phosphate O-acyltransferase 1	2401.09	0.106753	0.0885965	0.999608
ENSSSCG00000001436	RNF5	ring finger protein 5	1471.07	0.132061	0.0981884	0.999608
ENSSSCG00000001437	AGER	advanced glycosylation end-product specific receptor	8.53514	0.174912	0.675918	0.999608
ENSSSCG00000001438	PBX2	PBX homeobox 2	2.28584	0.427327	0.564746	0.999608
ENSSSCG00000001439	GPSM3	G protein signaling modulator 3	23.959	0.0451628	0.869558	0.999608
ENSSSCG00000001440	NOTCH4	notch receptor 4	461.585	-0.00651467	0.947746	0.999608
ENSSSCG00000001453	HLA-DRA	MHC class II DR-alpha	18.5794	-0.816019	0.153025	0.999608
ENSSSCG00000001457	SLA-DQB1	SLA-DQ beta1 domain	57.4234	0.0144366	0.95221	0.999608
ENSSSCG00000001459	HLA-DOB	MHC class II, DO beta	43.138	-0.180324	0.427519	0.999608
ENSSSCG00000001463	PSMB9	proteasome 20S subunit beta 9	117.451	-0.980587	0.0424308	0.999608
ENSSSCG00000001469	SLA-DMB	MHC class II, DM beta	169.305	0.0855278	0.648559	0.999608
ENSSSCG00000001470	SLA-DMA	SLA-DM alpha chain	32.6449	-0.0838401	0.786737	0.999608
ENSSSCG00000001471	BRD2	bromodomain containing 2	3820.38	0.010593	0.860382	0.999608
ENSSSCG00000001472	SLA-DOA	major histocompatibility complex, class II, DO alpha	2.27195	-1.01157	0.275201	0.999608
ENSSSCG00000001473	COL11A2	collagen type XI alpha 2 chain	910.135	-0.0778761	0.599213	0.999608
ENSSSCG00000001474	RXRB	retinoid X receptor beta	1190.93	0.00706305	0.900475	0.999608
ENSSSCG00000001475	SLC39A7	solute carrier family 39 member 7	1984.94	0.0507405	0.344972	0.999608
ENSSSCG00000001476	HSD17B8	hydroxysteroid 17-beta dehydrogenase 8	441.667	-0.0306992	0.732621	0.999608
ENSSSCG00000001477	RING1	ring finger protein 1	1655.34	0.0292915	0.698624	0.999608
ENSSSCG00000001478	BMP5	bone morphogenetic protein 5	82.4186	-0.156859	0.367126	0.999608
ENSSSCG00000001479	HMGCLL1	3-hydroxymethyl-3-methylglutaryl-CoA lyase like 1	854.157	0.0392405	0.693361	0.999608
ENSSSCG00000001480	GFRAL	GDNF family receptor alpha like	5.81196	-0.329259	0.434072	0.999608
ENSSSCG00000001481	HCRTR2	hypocretin receptor 2	136.291	-0.0998731	0.658111	0.999608
ENSSSCG00000001483	FAM83B	family with sequence similarity 83 member B	11.0303	0.261182	0.591901	0.999608
ENSSSCG00000001484	TINAG	tubulointerstitial nephritis antigen	1.26898	1.15735	0.195069	0.999608
ENSSSCG00000001485	MLIP	muscular LMNA interacting protein	161.075	-0.134597	0.391799	0.999608
ENSSSCG00000001486	LRRC1	leucine rich repeat containing 1	145.02	-0.119089	0.288904	0.999608
ENSSSCG00000001487	KLHL31	kelch like family member 31	2.69777	0.895971	0.132953	0.999608
ENSSSCG00000001488	GCLC	glutamate-cysteine ligase catalytic subunit	582.711	-0.0950706	0.300434	0.999608
ENSSSCG00000001490	KHDRBS2	KH RNA binding domain containing, signal transduction associated 2	122.104	-0.1042	0.526757	0.999608
ENSSSCG00000001493	PRIM2	DNA primase subunit 2	138.558	0.0687281	0.527254	0.999608
ENSSSCG00000001497	ZNF451	zinc finger protein 451	525.927	0.0562118	0.448176	0.999608
ENSSSCG00000001498	BEND6	BEN domain containing 6	1570.35	0.0371052	0.676285	0.999608
ENSSSCG00000001499	DST	dystonin	7494.04	-0.0832621	0.294431	0.999608
ENSSSCG00000001500	COL21A1	collagen type XXI alpha 1 chain	227.438	-0.22506	0.288712	0.999608
ENSSSCG00000001501	VPS52	VPS52 subunit of GARP complex	1752.32	0.103599	0.0751019	0.999608
ENSSSCG00000001502	RPS18	ribosomal protein S18	5379.72	0.184241	0.158518	0.999608
ENSSSCG00000001503	B3GALT4	beta-1,3-galactosyltransferase 4	237.726	0.110349	0.190641	0.999608
ENSSSCG00000001504	WDR46	WD repeat domain 46	13.568	-0.0219588	0.950176	0.999608
ENSSSCG00000001506	RGL2	ral guanine nucleotide dissociation stimulator like 2	500.457	0.0501233	0.710039	0.999608
ENSSSCG00000001507	ZBTB22	zinc finger and BTB domain containing 22	1690.38	-0.0624299	0.428431	0.999608
ENSSSCG00000001509	DAXX	death domain associated protein	851.023	-0.106263	0.286099	0.999608
ENSSSCG00000001510	KIFC1	kinesin family member C1	9.04256	0.562664	0.178409	0.999608
ENSSSCG00000001511	PHF1	PHD finger protein 1	648.069	-0.00344812	0.965875	0.999608
ENSSSCG00000001513	SYNGAP1	synaptic Ras GTPase activating protein 1	4781.91	0.0381309	0.70092	0.999608
ENSSSCG00000001518	ITPR3	inositol 1,4,5-trisphosphate receptor type 3	82.4264	-0.0114019	0.94824	0.999608
ENSSSCG00000001520	LEMD2	LEM domain containing 2	1281.09	0.0204914	0.831281	0.999608
ENSSSCG00000001523	GRM4	glutamate metabotropic receptor 4	248.519	-0.083425	0.712667	0.999608
ENSSSCG00000001527	ILRUN	inflammation and lipid regulator with UBA-like and NBR1-like domains	1705.4	-0.0235665	0.815702	0.999608
ENSSSCG00000001531	SNRPC	small nuclear ribonucleoprotein polypeptide C	938.767	0.0674481	0.463452	0.999608
ENSSSCG00000001532	UHRF1BP1	UHRF1 binding protein 1	70.0132	-0.0361416	0.847166	0.999608
ENSSSCG00000001534	ANKS1A	ankyrin repeat and sterile alpha motif domain containing 1A	533.521	-0.0158073	0.802421	0.999608
ENSSSCG00000001535	TCP11	t-complex 11	32.2469	-0.157897	0.451702	0.999608
ENSSSCG00000001536	SCUBE3	signal peptide, CUB domain and EGF like domain containing 3	40.1134	-0.356456	0.0505657	0.999608
ENSSSCG00000001537	ZNF76	zinc finger protein 76	11.1831	-0.0955224	0.758084	0.999608
ENSSSCG00000001538	DEF6	DEF6 guanine nucleotide exchange factor	0.641497	-0.838413	0.51355	0.999608
ENSSSCG00000001539	PPARD	peroxisome proliferator activated receptor delta	538.414	0.0819563	0.327846	0.999608
ENSSSCG00000001543	RPL10A	ribosomal protein L10a	18.2892	0.346156	0.181244	0.999608
ENSSSCG00000001544	TEAD3	TEA domain transcription factor 3	147.027	-0.0430148	0.709334	0.999608
ENSSSCG00000001546	FANCE	FA complementation group E	36.282	0.250717	0.18927	0.999608
ENSSSCG00000001549	FKBP5	FKBP prolyl isomerase 5	534.837	-0.0963608	0.52545	0.999608
ENSSSCG00000001550	ARMC12	armadillo repeat containing 12	34.1606	-0.112674	0.566589	0.999608
ENSSSCG00000001552	CLPS	colipase	0.337904	1.5302	0.577329	0.999608
ENSSSCG00000001553	LHFPL5	LHFPL tetraspan subfamily member 5	59.2241	0.0212325	0.885532	0.999608
ENSSSCG00000001554	SRPK1	SRSF protein kinase 1	1114.32	0.0733958	0.130335	0.999608
ENSSSCG00000001555	SLC26A8	solute carrier family 26 member 8	24.8996	-0.160321	0.493428	0.999608
ENSSSCG00000001556	MAPK14	mitogen-activated protein kinase 14	866.188	-0.0514384	0.405735	0.999608
ENSSSCG00000001559	PNPLA1	patatin like phospholipase domain containing 1	0.843355	1.19083	0.320211	0.999608
ENSSSCG00000001560	BNIP5	BCL2 interacting protein 5	2.45971	0.190767	0.759872	0.999608
ENSSSCG00000001561	ETV7	ETS variant transcription factor 7	148.301	-0.360737	0.141444	0.999608
ENSSSCG00000001562	KCTD20	potassium channel tetramerization domain containing 20	552.15	-0.057556	0.428115	0.999608
ENSSSCG00000001563	STK38	serine/threonine kinase 38	306.804	-0.0899137	0.278962	0.999608
ENSSSCG00000001564	SRSF3	serine and arginine rich splicing factor 3	3067.7	-0.0822881	0.16594	0.999608
ENSSSCG00000001565	CDKN1A	cyclin dependent kinase inhibitor 1A	220.109	-0.20088	0.0907015	0.999608
ENSSSCG00000001566	RAB44	RAB44, member RAS oncogene family	2.6257	0.542456	0.455001	0.999608
ENSSSCG00000001567	CPNE5	copine 5	675.952	0.0600669	0.473248	0.999608
ENSSSCG00000001570	PI16	peptidase inhibitor 16	22.7801	0.106865	0.658027	0.999608
ENSSSCG00000001571	MTCH1	mitochondrial carrier 1	9364.84	0.165835	0.0154163	0.999608
ENSSSCG00000001572	FGD2	FYVE, RhoGEF and PH domain containing 2	441.506	0.10494	0.477878	0.999608
ENSSSCG00000001573	PIM1	Pim-1 proto-oncogene, serine/threonine kinase	190.483	0.210197	0.0483441	0.999608
ENSSSCG00000001576	TMEM217	transmembrane protein 217	0.795837	0.671908	0.546483	0.999608
ENSSSCG00000001577	TBC1D22B	TBC1 domain family member 22B	442.436	0.0698464	0.248491	0.999608
ENSSSCG00000001578	CMTR1	cap methyltransferase 1	1076.91	0.000788621	0.990206	0.999608
ENSSSCG00000001582	MDGA1	MAM domain containing glycosylphosphatidylinositol anchor 1	483.822	0.205966	0.0512541	0.999608
ENSSSCG00000001589	GLP1R	glucagon like peptide 1 receptor	2.65467	0.167537	0.890705	0.999608
ENSSSCG00000001592	KCNK17	potassium two pore domain channel subfamily K member 17	0.194935	0.0925377	0.971993	0.999608
ENSSSCG00000001595	DAAM2	dishevelled associated activator of morphogenesis 2	3618.61	-0.198874	0.202902	0.999608
ENSSSCG00000001596	MOCS1	molybdenum cofactor synthesis 1	161.754	0.0886882	0.334947	0.999608
ENSSSCG00000001597	LRFN2	leucine rich repeat and fibronectin type III domain containing 2	463.357	0.118151	0.0649303	0.999608
ENSSSCG00000001611	NFYA	nuclear transcription factor Y subunit alpha	406.572	-0.0256744	0.685097	0.999608
ENSSSCG00000001613	TREML1	triggering receptor expressed on myeloid cells like 1	0.142634	0.504812	0.87168	0.999608
ENSSSCG00000001616	TREML2	triggering receptor expressed on myeloid cells like 2	2.76937	-1.11039	0.0870636	0.999608
ENSSSCG00000001619	FOXP4	forkhead box P4	397.948	0.0422727	0.693655	0.999608
ENSSSCG00000001620	MDFI	MyoD family inhibitor	130.891	0.0269017	0.85189	0.999608
ENSSSCG00000001621	TFEB	transcription factor EB	611.108	-0.145583	0.300766	0.999608
ENSSSCG00000001624	FRS3	fibroblast growth factor receptor substrate 3	275.666	0.0564611	0.489179	0.999608
ENSSSCG00000001625	PGC	progastricsin	2.10556	-1.02908	0.257863	0.999608
ENSSSCG00000001629	USP49	ubiquitin specific peptidase 49	79.0153	0.00298836	0.987721	0.999608
ENSSSCG00000001637	GUCA1B	guanylate cyclase activator 1B	2.54732	-0.136714	0.82144	0.999608
ENSSSCG00000001638	MRPS10	mitochondrial ribosomal protein S10	711.063	0.0182595	0.787017	0.999608
ENSSSCG00000001639	TRERF1	transcriptional regulating factor 1	133.278	-0.171674	0.132127	0.999608
ENSSSCG00000001641	UBR2	ubiquitin protein ligase E3 component n-recognin 2	306.009	0.0202347	0.866308	0.999608
ENSSSCG00000001646	BICRAL	BRD4 interacting chromatin remodeling complex associated protein like	446.319	-0.107871	0.162506	0.999608
ENSSSCG00000001650	PTCRA	pre T cell antigen receptor alpha	2.35446	-0.233805	0.742714	0.999608
ENSSSCG00000001651	CNPY3	canopy FGF signaling regulator 3	665.137	0.0502657	0.513791	0.999608
ENSSSCG00000001653	PEX6	peroxisomal biogenesis factor 6	808.613	0.021273	0.781495	0.999608
ENSSSCG00000001654	PPP2R5D	protein phosphatase 2 regulatory subunit B'delta	242.519	0.178267	0.44049	0.999608
ENSSSCG00000001655	MEA1	male-enhanced antigen 1	21.2818	0.121648	0.66968	0.999608
ENSSSCG00000001656	RRP36	ribosomal RNA processing 36	774.468	0.104796	0.238616	0.999608
ENSSSCG00000001657	CUL7	cullin 7	494.988	-0.0305307	0.766083	0.999608
ENSSSCG00000001659	KLC4	kinesin light chain 4	620.539	0.139704	0.0320215	0.999608
ENSSSCG00000001660	PTK7	protein tyrosine kinase 7 (inactive)	689.812	0.0151344	0.794874	0.999608
ENSSSCG00000001661	SRF	serum response factor	308.917	0.0053608	0.972565	0.999608
ENSSSCG00000001664	TTBK1	tau tubulin kinase 1	881.067	0.0814062	0.429971	0.999608
ENSSSCG00000001667	ZNF318	zinc finger protein 318	218.632	0.0280022	0.80926	0.999608
ENSSSCG00000001672	CRIP3	cysteine rich protein 3	22.8811	-0.216652	0.435011	0.999608
ENSSSCG00000001676	LRRC73	leucine rich repeat containing 73	756.975	0.0804033	0.445445	0.999608
ENSSSCG00000001679	XPO5	exportin 5	1314.05	0.00850447	0.875251	0.999608
ENSSSCG00000001680	ABCC10	ATP binding cassette subfamily C member 10	406.095	-0.0983051	0.479529	0.999608
ENSSSCG00000001682	DLK2	delta like non-canonical Notch ligand 2	277.232	0.0333899	0.78992	0.999608
ENSSSCG00000001683	POLH	DNA polymerase eta	146.62	-0.0540542	0.659251	0.999608
ENSSSCG00000001688	TJAP1	tight junction associated protein 1	686.464	-0.219059	0.0581867	0.999608
ENSSSCG00000001689	GTPBP2	GTP binding protein 2	464.438	0.027368	0.714887	0.999608
ENSSSCG00000001691	RSPH9	radial spoke head component 9	61.4059	0.0210075	0.890086	0.999608
ENSSSCG00000001692	MRPS18A	mitochondrial ribosomal protein S18A	1363.31	0.116265	0.202023	0.999608
ENSSSCG00000001695	VEGFA	vascular endothelial growth factor A	460.981	-0.0578599	0.739633	0.999608
ENSSSCG00000001697	TMEM63B	transmembrane protein 63B	2035.03	0.122168	0.0356979	0.999608
ENSSSCG00000001698	CAPN11	calpain 11	2.97925	0.219189	0.730202	0.999608
ENSSSCG00000001700	SLC29A1	solute carrier family 29 member 1 (Augustine blood group)	235.515	0.133904	0.173588	0.999608
ENSSSCG00000001701	HSP90AB1	heat shock protein 90 alpha family class B member 1	5850.25	0.192121	0.29207	0.999608
ENSSSCG00000001702	SLC35B2	solute carrier family 35 member B2	5.45749	-0.0678939	0.880369	0.999608
ENSSSCG00000001703	NFKBIE	NFKB inhibitor epsilon	557.23	0.139927	0.0263158	0.999608
ENSSSCG00000001705	TCTE1	t-complex-associated-testis-expressed 1	1912.82	0.00905945	0.923939	0.999608
ENSSSCG00000001706	AARS2	alanyl-tRNA synthetase 2, mitochondrial	712.268	-0.139532	0.109976	0.999608
ENSSSCG00000001708	CDC5L	cell division cycle 5 like	1060.09	0.0222263	0.651299	0.999608
ENSSSCG00000001709	SUPT3H	SPT3 homolog, SAGA and STAGA complex component	344.931	0.0269379	0.690335	0.999608
ENSSSCG00000001710	RUNX2	RUNX family transcription factor 2	130.07	0.110191	0.578901	0.999608
ENSSSCG00000001715	ENPP5	ectonucleotide pyrophosphatase/phosphodiesterase family member 5	986.941	0.00686713	0.95976	0.999608
ENSSSCG00000001716	RCAN2	regulator of calcineurin 2	663.415	-0.0989549	0.20788	0.999608
ENSSSCG00000001718	CYP39A1	cytochrome P450, family 39, subfamily A, polypeptide 1	179.953	-0.126089	0.351188	0.999608
ENSSSCG00000001720	SLC25A27	solute carrier family 25 member 27	1081.97	-0.0331916	0.597469	0.999608
ENSSSCG00000001723	PLA2G7	phospholipase A2 group VII	244.948	-0.105299	0.507382	0.999608
ENSSSCG00000001725	ADGRF5	adhesion G protein-coupled receptor F5	235.06	-0.0827326	0.547247	0.999608
ENSSSCG00000001727	TNFRSF21	TNF receptor superfamily member 21	1530.35	0.0126394	0.881269	0.999608
ENSSSCG00000001729	PTCHD4	patched domain containing 4	8.04287	0.411352	0.201592	0.999608
ENSSSCG00000001731	CENPQ	centromere protein Q	20.3984	0.430185	0.148124	0.999608
ENSSSCG00000001732	MMUT	methylmalonyl-CoA mutase	414.903	0.0434604	0.659621	0.999608
ENSSSCG00000001735	RHAG	Rh associated glycoprotein	2.8515	-1.32418	0.0266487	0.999608
ENSSSCG00000001736	CRISP2	cysteine rich secretory protein 2	3.97718	0.306919	0.645604	0.999608
ENSSSCG00000001739	CRISP1	cysteine rich secretory protein 1	0.617827	-2.15706	0.184223	0.999608
ENSSSCG00000001744	TFAP2D	transcription factor AP-2 delta	0.561176	1.17845	0.547919	0.999608
ENSSSCG00000001746	PKHD1	PKHD1 ciliary IPT domain containing fibrocystin/polyductin	1.36871	-0.983496	0.227668	0.999608
ENSSSCG00000001750	PAQR8	progestin and adipoQ receptor family member 8	1498.66	0.0365225	0.522892	0.999608
ENSSSCG00000001751	CHRNA5	cholinergic receptor nicotinic alpha 5 subunit	82.2176	-0.0838991	0.708157	0.999608
ENSSSCG00000001752	CHRNA3	cholinergic receptor nicotinic alpha 3 subunit	105.249	-0.197098	0.184426	0.999608
ENSSSCG00000001755	HYKK	hydroxylysine kinase	43.1503	-0.0649443	0.730212	0.999608
ENSSSCG00000001756	IREB2	iron responsive element binding protein 2	736.242	-0.0816188	0.388975	0.999608
ENSSSCG00000001757	WDR61	WD repeat domain 61	642.452	0.13208	0.190058	0.999608
ENSSSCG00000001760	ACSBG1	acyl-CoA synthetase bubblegum family member 1	2959.31	0.0310284	0.671621	0.999608
ENSSSCG00000001762	CIB2	calcium and integrin binding family member 2	2660.35	0.141302	0.12354	0.999608
ENSSSCG00000001764	SH2D7	SH2 domain containing 7	48.7191	0.223077	0.466927	0.999608
ENSSSCG00000001765	ADAMTS7	ADAM metallopeptidase with thrombospondin type 1 motif 7	70.3663	-0.0125248	0.935953	0.999608
ENSSSCG00000001769	MORF4L1	mortality factor 4 like 1	3424.31	-0.0258601	0.803264	0.999608
ENSSSCG00000001770	CTSH	cathepsin H	48.2351	-0.0169111	0.923923	0.999608
ENSSSCG00000001771	RASGRF1	Ras protein specific guanine nucleotide releasing factor 1	2957.68	0.0947774	0.251745	0.999608
ENSSSCG00000001773	TMED3	transmembrane p24 trafficking protein 3	498.1	0.135052	0.265727	0.999608
ENSSSCG00000001775	MINAR1	membrane integral NOTCH2 associated receptor 1	149.874	0.128572	0.467863	0.999608
ENSSSCG00000001779	ZFAND6	zinc finger AN1-type containing 6	1142.18	0.0727446	0.293946	0.999608
ENSSSCG00000001780	FAH	fumarylacetoacetate hydrolase	247.205	0.0533723	0.672817	0.999608
ENSSSCG00000001782	ABHD17C	abhydrolase domain containing 17C	901.489	-0.0339034	0.657016	0.999608
ENSSSCG00000001786	CFAP161	cilia and flagella associated protein 161	144.285	-0.227606	0.146712	0.999608
ENSSSCG00000001787	IL16	interleukin 16	46.4101	-0.0427391	0.776648	0.999608
ENSSSCG00000001788	STARD5	StAR related lipid transfer domain containing 5	54.4828	0.0657822	0.595265	0.999608
ENSSSCG00000001789	TMC3	transmembrane channel like 3	0.635818	-0.964534	0.514438	0.999608
ENSSSCG00000001792	EFL1	elongation factor like GTPase 1	416.896	0.0849193	0.205129	0.999608
ENSSSCG00000001793	ADAMTSL3	ADAMTS like 3	173.772	-0.128369	0.684273	0.999608
ENSSSCG00000001795	SH3GL3	SH3 domain containing GRB2 like 3, endophilin A3	1967.21	-0.104713	0.390771	0.999608
ENSSSCG00000001798	BNC1	basonuclin 1	2.49954	-0.797789	0.185278	0.999608
ENSSSCG00000001800	TM6SF1	transmembrane 6 superfamily member 1	609.518	-0.045305	0.717635	0.999608
ENSSSCG00000001801	BTBD1	BTB domain containing 1	1168.47	0.0220574	0.87473	0.999608
ENSSSCG00000001804	HOMER2	homer scaffold protein 2	514.213	-0.00114746	0.990822	0.999608
ENSSSCG00000001805	WHAMM	WASP homolog associated with actin, golgi membranes and microtubules	271.714	-0.124339	0.247122	0.999608
ENSSSCG00000001806	FSD2	fibronectin type III and SPRY domain containing 2	11.3785	0.295944	0.3845	0.999608
ENSSSCG00000001807	AP3B2	adaptor related protein complex 3 subunit beta 2	2300.87	0.142327	0.105661	0.999608
ENSSSCG00000001808	CPEB1	cytoplasmic polyadenylation element binding protein 1	486.102	0.0700345	0.408473	0.999608
ENSSSCG00000001810	PDE8A	phosphodiesterase 8A	221.554	-0.201499	0.0883211	0.999608
ENSSSCG00000001814	IQGAP1	IQ motif containing GTPase activating protein 1	364.828	-0.0326548	0.691037	0.999608
ENSSSCG00000001816	BLM	BLM RecQ like helicase	159.423	-0.0536346	0.524328	0.999608
ENSSSCG00000001817	FURIN	furin, paired basic amino acid cleaving enzyme	1193.14	0.113788	0.0945778	0.999608
ENSSSCG00000001818	FES	FES proto-oncogene, tyrosine kinase	314.182	0.0130294	0.907002	0.999608
ENSSSCG00000001819	MAN2A2	mannosidase alpha class 2A member 2	3725.22	-0.00201169	0.978819	0.999608
ENSSSCG00000001820	HDDC3	HD domain containing 3	365.828	0.0256494	0.657376	0.999608
ENSSSCG00000001821	UNC45A	unc-45 myosin chaperone A	447.26	0.216965	0.149116	0.999608
ENSSSCG00000001822	RCCD1	RCC1 domain containing 1	167.081	-0.0841653	0.435331	0.999608
ENSSSCG00000001823	UROC1	urocanate hydratase 1	21.9426	-0.199893	0.562056	0.999608
ENSSSCG00000001824	ZXDC	ZXD family zinc finger C	352.353	0.0911562	0.350319	0.999608
ENSSSCG00000001825	SLC41A3	solute carrier family 41 member 3	464.092	0.223415	0.0248095	0.999608
ENSSSCG00000001826	CFAP100	cilia and flagella associated protein 100	967.976	-0.262059	0.160655	0.999608
ENSSSCG00000001832	ACAN	aggrecan	82.4658	-0.0369903	0.843059	0.999608
ENSSSCG00000001834	MFGE8	milk fat globule-EGF factor 8 protein	2966.45	0.123585	0.136138	0.999608
ENSSSCG00000001835	ABHD2	abhydrolase domain containing 2	52.4244	0.00322818	0.989935	0.999608
ENSSSCG00000001836	RLBP1	retinaldehyde binding protein 1	1599.08	0.0512927	0.521282	0.999608
ENSSSCG00000001837	FANCI	FA complementation group I	87.2441	0.158562	0.187401	0.999608
ENSSSCG00000001838	POLG	DNA polymerase gamma, catalytic subunit	727.765	0.0470334	0.637308	0.999608
ENSSSCG00000001840	KIF7	kinesin family member 7	330.908	-0.0344384	0.758614	0.999608
ENSSSCG00000001841	RHCG	Rh family C glycoprotein	88.5909	0.146068	0.343386	0.999608
ENSSSCG00000001844	PLIN1	perilipin 1	22.0243	0.0860637	0.814554	0.999608
ENSSSCG00000001846	WDR93	WD repeat domain 93	73.5899	-0.283708	0.066284	0.999608
ENSSSCG00000001847	MESP1	mesoderm posterior bHLH transcription factor 1	520.659	0.0958172	0.349547	0.999608
ENSSSCG00000001848	MESP2	mesoderm posterior bHLH transcription factor 2	375.798	0.0888346	0.371813	0.999608
ENSSSCG00000001849	ANPEP	alanyl aminopeptidase, membrane	58.9065	-0.0301152	0.843768	0.999608
ENSSSCG00000001852	IDH2	isocitrate dehydrogenase (NADP(+)) 2	2583.98	0.0134064	0.838975	0.999608
ENSSSCG00000001858	CIB1	calcium and integrin binding 1	593.48	-0.018568	0.864845	0.999608
ENSSSCG00000001862	ETFA	electron transfer flavoprotein subunit alpha	715.631	-0.0180031	0.825766	0.999608
ENSSSCG00000001863	TMEM266	transmembrane protein 266	253.124	-0.013228	0.86412	0.999608
ENSSSCG00000001865	SCAPER	S-phase cyclin A associated protein in the ER	493.051	0.07905	0.321551	0.999608
ENSSSCG00000001866	RCN2	reticulocalbin 2	2487.64	0.017009	0.720126	0.999608
ENSSSCG00000001867	PSTPIP1	proline-serine-threonine phosphatase interacting protein 1	10.1121	-0.029581	0.930437	0.999608
ENSSSCG00000001868	TSPAN3	tetraspanin 3	5565.7	0.0927958	0.142797	0.999608
ENSSSCG00000001869	PEAK1	pseudopodium enriched atypical kinase 1	55.2214	0.0278823	0.908873	0.999608
ENSSSCG00000001871	HMG20A	high mobility group 20A	1529.32	0.00476398	0.917526	0.999608
ENSSSCG00000001872	LINGO1	leucine rich repeat and Ig domain containing 1	5486.79	0.0942907	0.217982	0.999608
ENSSSCG00000001873	CSPG4	chondroitin sulfate proteoglycan 4	522.771	-0.0508097	0.620556	0.999608
ENSSSCG00000001875	SNX33	sorting nexin 33	136.477	-0.151037	0.329709	0.999608
ENSSSCG00000001877	SNUPN	snurportin 1	512.13	0.106255	0.268618	0.999608
ENSSSCG00000001878	PTPN9	protein tyrosine phosphatase non-receptor type 9	649.424	0.0197255	0.816613	0.999608
ENSSSCG00000001879	ODF3L1	outer dense fiber of sperm tails 3 like 1	0.744948	1.40638	0.239256	0.999608
ENSSSCG00000001880	SIN3A	SIN3 transcription regulator family member A	549.702	-0.0218316	0.732382	0.999608
ENSSSCG00000001881	MAN2C1	mannosidase alpha class 2C member 1	592.609	-0.067508	0.618245	0.999608
ENSSSCG00000001882	NEIL1	nei like DNA glycosylase 1	148.4	-0.013209	0.913134	0.999608
ENSSSCG00000001884	COMMD4	COMM domain containing 4	255.053	0.0780538	0.567998	0.999608
ENSSSCG00000001885	C15orf39	chromosome 7 C15orf39 homolog	159.924	-0.0900293	0.356032	0.999608
ENSSSCG00000001887	SCAMP5	secretory carrier membrane protein 5	4942.61	0.062948	0.446577	0.999608
ENSSSCG00000001888	RPP25	ribonuclease P and MRP subunit p25	148.366	0.0743137	0.556412	0.999608
ENSSSCG00000001892	SCAMP2	secretory carrier membrane protein 2	348.44	-0.189465	0.0573211	0.999608
ENSSSCG00000001895	CPLX3	complexin 3	36.276	0.0605263	0.75752	0.999608
ENSSSCG00000001899	LMAN1L	lectin, mannose binding 1 like	3.54156	0.124443	0.863216	0.999608
ENSSSCG00000001900	CSK	CSK, non-receptor tyrosine kinase	1062.9	0.0477343	0.325842	0.999608
ENSSSCG00000001901	CYP1A2	cytochrome P450, family 1, subfamily A, polypeptide 2	1.30543	0.633589	0.452211	0.999608
ENSSSCG00000001903	EDC3	enhancer of mRNA decapping 3	622.799	0.0206416	0.683031	0.999608
ENSSSCG00000001904	CLK3	CDC like kinase 3	287.755	-0.00679503	0.938335	0.999608
ENSSSCG00000001905	ARID3B	AT-rich interaction domain 3B	155.763	-0.000452752	0.997391	0.999608
ENSSSCG00000001906	CYP1A1	cytochrome P450 1A1	1.7641	1.25237	0.224664	0.999608
ENSSSCG00000001907	UBL7	ubiquitin like 7	1244.99	0.0409353	0.629524	0.999608
ENSSSCG00000001908	CCDC33	coiled-coil domain containing 33	38.301	-0.433187	0.171439	0.999608
ENSSSCG00000001909	STRA6	stimulated by retinoic acid 6	67.1158	0.0674956	0.660047	0.999608
ENSSSCG00000001910	ISLR	immunoglobulin superfamily containing leucine rich repeat	136.012	0.170077	0.367699	0.999608
ENSSSCG00000001912	PML	promyelocytic leukemia	613.858	-0.401277	0.120576	0.999608
ENSSSCG00000001913	STOML1	stomatin like 1	844.095	0.00677295	0.92952	0.999608
ENSSSCG00000001914	LOXL1	lysyl oxidase like 1	243.768	0.154345	0.26088	0.999608
ENSSSCG00000001916	INSYN1	inhibitory synaptic factor 1	2158.92	0.125674	0.0863975	0.999608
ENSSSCG00000001917	CD276	CD276 molecule	386.176	0.0198791	0.740275	0.999608
ENSSSCG00000001918	NPTN	neuroplastin	6912.11	0.0464991	0.394312	0.999608
ENSSSCG00000001920	HCN4	hyperpolarization activated cyclic nucleotide gated potassium channel 4	151.548	0.0821356	0.608553	0.999608
ENSSSCG00000001921	NEO1	neogenin 1	2148.44	0.0453383	0.531777	0.999608
ENSSSCG00000001925	ADPGK	ADP dependent glucokinase	614.989	-0.142714	0.15968	0.999608
ENSSSCG00000001926	TMEM202	transmembrane protein 202	1.70207	0.135049	0.887558	0.999608
ENSSSCG00000001934	SEC23A	Sec23 homolog A, COPII coat complex component	844.062	0.0226906	0.795284	0.999608
ENSSSCG00000001938	SSTR1	somatostatin receptor 1	1251.37	0.0784154	0.762915	0.999608
ENSSSCG00000001942	PAX9	paired box 9	32.9104	0.0543281	0.764222	0.999608
ENSSSCG00000001944	NKX2-8	NK2 homeobox 8	2.11967	0.319106	0.729371	0.999608
ENSSSCG00000001945	NKX2-1	NK2 homeobox 1	13.0317	0.0767818	0.823992	0.999608
ENSSSCG00000001946	MBIP	MAP3K12 binding inhibitory protein 1	389.537	0.134758	0.361303	0.999608
ENSSSCG00000001947	BRMS1L	BRMS1 like transcriptional repressor	631.307	0.046563	0.399632	0.999608
ENSSSCG00000001949	INSM2	INSM transcriptional repressor 2	1.04843	-0.618752	0.5293	0.999608
ENSSSCG00000001950	PSMA6	protein only RNase P catalytic subunit	1485.14	0.107177	0.155935	0.999608
ENSSSCG00000001952	NFKBIA	NFKB inhibitor alpha	419.868	-0.00101041	0.992631	0.999608
ENSSSCG00000001955	SRP54	signal recognition particle 54	735.467	-0.0357811	0.652889	0.999608
ENSSSCG00000001958	BAZ1A	bromodomain adjacent to zinc finger domain 1A	176.792	-0.151049	0.226628	0.999608
ENSSSCG00000001959	CFL2	cofilin 2	1413.77	-0.0934458	0.188335	0.999608
ENSSSCG00000001960	EAPP	E2F associated phosphoprotein	354.878	-0.0113465	0.906448	0.999608
ENSSSCG00000001963	EGLN3	egl-9 family hypoxia inducible factor 3	250.53	-0.239346	0.113202	0.999608
ENSSSCG00000001964	NPAS3	neuronal PAS domain protein 3	132.445	-0.0508435	0.777723	0.999608
ENSSSCG00000001966	ARHGAP5	Rho GTPase activating protein 5	1593.58	-0.143835	0.0860003	0.999608
ENSSSCG00000001968	NUBPL	nucleotide binding protein like	338.29	0.0318184	0.654326	0.999608
ENSSSCG00000001971	HECTD1	HECT domain E3 ubiquitin protein ligase 1	583.241	-0.00488688	0.978548	0.999608
ENSSSCG00000001972	AP4S1	adaptor related protein complex 4 subunit sigma 1	367.138	-0.0236393	0.789114	0.999608
ENSSSCG00000001973	SCFD1	sec1 family domain containing 1	534.541	-0.036531	0.627252	0.999608
ENSSSCG00000001974	G2E3	G2/M-phase specific E3 ubiquitin protein ligase	273.915	-0.120611	0.371632	0.999608
ENSSSCG00000001975	PRKD1	protein kinase D1	316.16	-0.0366384	0.68347	0.999608
ENSSSCG00000001977	STXBP6	syntaxin binding protein 6	976.767	-0.157241	0.360934	0.999608
ENSSSCG00000001978	GZMH	granzyme B (granzyme 2, cytotoxic T-lymphocyte-associated serine esterase 1)	1.22258	0.169963	0.878484	0.999608
ENSSSCG00000001983	SDR39U1	short chain dehydrogenase/reductase family 39U member 1	606.786	-0.00206202	0.980943	0.999608
ENSSSCG00000001984	KHNYN	KH and NYN domain containing	203.759	-0.0386957	0.70374	0.999608
ENSSSCG00000001985	CBLN3	cerebellin 3 precursor	23.5215	-0.191611	0.296121	0.999608
ENSSSCG00000001986	NFATC4	nuclear factor of activated T cells 4	69.2083	0.179487	0.367257	0.999608
ENSSSCG00000001987	RIPK3	receptor interacting serine/threonine kinase 3	4.66782	0.122779	0.792918	0.999608
ENSSSCG00000001988	ADCY4	adenylate cyclase 4	74.1231	0.242753	0.256011	0.999608
ENSSSCG00000001989	CIDEB	cell death inducing DFFA like effector b	5.26204	-0.353207	0.447183	0.999608
ENSSSCG00000001990	NOP9	NOP9 nucleolar protein	285.423	0.137188	0.0877236	0.999608
ENSSSCG00000001991	DHRS1	dehydrogenase/reductase 1	337.156	0.0388276	0.651024	0.999608
ENSSSCG00000001992	RABGGTA	Rab geranylgeranyltransferase subunit alpha	2.92198	-0.331017	0.559255	0.999608
ENSSSCG00000001993	TGM1	transglutaminase 1	17.1307	-0.248198	0.376307	0.999608
ENSSSCG00000001994	TINF2	TERF1 interacting nuclear factor 2	725.194	0.0362772	0.536089	0.999608
ENSSSCG00000002000	IPO4	importin 4	1170.31	0.0544319	0.285335	0.999608
ENSSSCG00000002001	REC8	REC8 meiotic recombination protein	271.69	-0.458027	0.0284013	0.999608
ENSSSCG00000002002	IRF9	interferon regulatory factor 9	11.4612	-0.814221	0.167051	0.999608
ENSSSCG00000002004	PSME2	proteasome activator subunit 2	17.7696	0.0599619	0.880134	0.999608
ENSSSCG00000002005	EMC9	ER membrane protein complex subunit 9	13.6396	0.166128	0.576888	0.999608
ENSSSCG00000002006	PSME1	proteasome activator subunit 1	11.5931	-0.0194623	0.945882	0.999608
ENSSSCG00000002007	FITM1	fat storage inducing transmembrane protein 1	1.89722	-0.0888293	0.906799	0.999608
ENSSSCG00000002008	DCAF11	DDB1 and CUL4 associated factor 11	1202.88	0.0421512	0.539834	0.999608
ENSSSCG00000002009	PCK2	phosphoenolpyruvate carboxykinase 2, mitochondrial	163.435	-0.131473	0.14527	0.999608
ENSSSCG00000002010	NRL	neural retina leucine zipper	2.42662	-0.729089	0.341462	0.999608
ENSSSCG00000002012	CARMIL3	capping protein regulator and myosin 1 linker 3	1137.84	0.135084	0.237574	0.999608
ENSSSCG00000002013	DHRS4	dehydrogenase/reductase (SDR family) member 4	509.432	0.112539	0.183896	0.999608
ENSSSCG00000002014	JPH4	junctophilin 4	9116.5	0.0862	0.285056	0.999608
ENSSSCG00000002015	AP1G2	adaptor related protein complex 1 subunit gamma 2	1.57687	0.265911	0.717289	0.999608
ENSSSCG00000002016	THTPA	thiamine triphosphatase	346.896	0.0899868	0.345086	0.999608
ENSSSCG00000002023	PABPN1	poly(A) binding protein nuclear 1	7122.96	-0.00727042	0.936115	0.999608
ENSSSCG00000002025	SLC22A17	solute carrier family 22 member 17	19014.3	0.0744487	0.113531	0.999608
ENSSSCG00000002026	EFS	embryonal Fyn-associated substrate	439.265	-0.144981	0.23853	0.999608
ENSSSCG00000002028	CMTM5	CKLF like MARVEL transmembrane domain containing 5	191.682	-0.144317	0.424874	0.999608
ENSSSCG00000002029	MYH7	myosin heavy chain 7	166.46	-0.0947256	0.478378	0.999608
ENSSSCG00000002032	SLC7A8	solute carrier family 7 member 8	812.453	0.0420676	0.650999	0.999608
ENSSSCG00000002033	CEBPE	CCAAT enhancer binding protein epsilon	1.55205	-0.458792	0.623922	0.999608
ENSSSCG00000002034	ACIN1	apoptotic chromatin condensation inducer 1	2347.58	-0.000613775	0.99423	0.999608
ENSSSCG00000002035	C14orf119	chromosome 7 C14orf119 homolog	330.222	-0.00455447	0.955164	0.999608
ENSSSCG00000002037	CDH24	cadherin 24	441.535	0.0670807	0.561777	0.999608
ENSSSCG00000002038	PSMB11	proteasome subunit beta 11	0.0455949	-0.217758	0.944452	0.999608
ENSSSCG00000002039	MMP14	matrix metallopeptidase 14	782.958	-0.0658547	0.455044	0.999608
ENSSSCG00000002040	MRPL52	mitochondrial ribosomal protein L52	518.276	0.1443	0.315802	0.999608
ENSSSCG00000002041	SLC7A7	solute carrier family 7 member 7	13.2067	-0.0810373	0.776826	0.999608
ENSSSCG00000002042	OXA1L	OXA1L mitochondrial inner membrane protein	542.268	0.162812	0.268178	0.999608
ENSSSCG00000002050	DAD1	defender against cell death 1	2025.34	0.0693499	0.542986	0.999608
ENSSSCG00000002051	ABHD4	abhydrolase domain containing 4	625.441	-0.00375131	0.960262	0.999608
ENSSSCG00000002052	OR6J1	olfactory receptor 6J1-like	0.0466985	0.45532	0.884167	0.999608
ENSSSCG00000002127	CHD8	chromodomain helicase DNA binding protein 8	1048.78	-0.025511	0.723625	0.999608
ENSSSCG00000002129	RPGRIP1	RPGR interacting protein 1	27.8786	-0.0542442	0.80734	0.999608
ENSSSCG00000002134	RNASE10	ribonuclease A family member 10 (inactive)	4.21642	0.167748	0.747798	0.999608
ENSSSCG00000002135	PNP	purine nucleoside phosphorylase	681.277	0.0225329	0.777066	0.999608
ENSSSCG00000002138	OSGEP	O-sialoglycoprotein endopeptidase	113.594	0.0677313	0.58964	0.999608
ENSSSCG00000002140	KLHL33	kelch like family member 33	6.58785	-0.141959	0.749858	0.999608
ENSSSCG00000002142	TEP1	telomerase associated protein 1	207.08	-0.183851	0.120595	0.999608
ENSSSCG00000002143	PARP2	poly(ADP-ribose) polymerase 2	313.87	-0.0719231	0.422122	0.999608
ENSSSCG00000002144	CCNB1IP1	cyclin B1 interacting protein 1	510.427	0.0845129	0.307892	0.999608
ENSSSCG00000002145	TTC5	tetratricopeptide repeat domain 5	264.44	-0.00608646	0.947639	0.999608
ENSSSCG00000002235	LPCAT4	lysophosphatidylcholine acyltransferase 4	1979.49	0.0848989	0.236137	0.999608
ENSSSCG00000002241	NUTM1	NUT midline carcinoma family member 1	17.5321	-0.0445415	0.874317	0.999608
ENSSSCG00000002243	SLC12A6	solute carrier family 12 member 6	603.25	-0.0177646	0.911724	0.999608
ENSSSCG00000002245	KATNBL1	katanin regulatory subunit B1 like 1	222.865	0.016297	0.85678	0.999608
ENSSSCG00000002252	ARRDC4	arrestin domain containing 4	345.527	-0.0622698	0.608626	0.999608
ENSSSCG00000002254	NR2F2	nuclear receptor subfamily 2 group F member 2	696.715	0.0800816	0.653694	0.999608
ENSSSCG00000002257	MCTP2	multiple C2 and transmembrane domain containing 2	8.36419	-0.168785	0.681493	0.999608
ENSSSCG00000002258	KLHL25	kelch like family member 25	168.419	-0.0297959	0.893749	0.999608
ENSSSCG00000002262	SV2B	synaptic vesicle glycoprotein 2B	2471.93	0.172772	0.233316	0.999608
ENSSSCG00000002263	SLCO3A1	solute carrier organic anion transporter family member 3A1	525.645	0.12949	0.0677792	0.999608
ENSSSCG00000002265	FAM174B	family with sequence similarity 174 member B	729.439	0.079071	0.316018	0.999608
ENSSSCG00000002267	RGMA	repulsive guidance molecule BMP co-receptor a	4030.86	0.00591493	0.963873	0.999608
ENSSSCG00000002268	AKAP5	A-kinase anchoring protein 5	576.238	0.0345887	0.801891	0.999608
ENSSSCG00000002269	MTHFD1	methylenetetrahydrofolate dehydrogenase, cyclohydrolase and formyltetrahydrofolate synthetase 1	1113.02	0.0931335	0.247511	0.999608
ENSSSCG00000002275	PPP1R36	protein phosphatase 1 regulatory subunit 36	290.377	-0.138204	0.390094	0.999608
ENSSSCG00000002276	PLEKHG3	pleckstrin homology and RhoGEF domain containing G3	1183.14	-0.345043	0.176047	0.999608
ENSSSCG00000002277	SPTB	spectrin beta, erythrocytic	716.09	0.152172	0.264206	0.999608
ENSSSCG00000002279	GPX2	glutathione peroxidase 2	6.34091	-0.162523	0.765714	0.999608
ENSSSCG00000002280	RAB15	RAB15, member RAS oncogene family	3847.08	0.152497	0.0588317	0.999608
ENSSSCG00000002283	FUT8	fucosyltransferase 8	652.479	0.00731175	0.888926	0.999608
ENSSSCG00000002284	CCDC196	coiled-coil domain containing 196	0.900293	1.36169	0.30546	0.999608
ENSSSCG00000002285	GPHN	gephyrin	1060.73	0.0974119	0.124064	0.999608
ENSSSCG00000002286	FAM71D	family with sequence similarity 71 member D	2.82862	-0.430964	0.426187	0.999608
ENSSSCG00000002287	MPP5	membrane palmitoylated protein 5	689.719	-0.17901	0.0652787	0.999608
ENSSSCG00000002290	PLEK2	pleckstrin 2	16.1038	-0.0899571	0.728083	0.999608
ENSSSCG00000002292	PLEKHH1	pleckstrin homology, MyTH4 and FERM domain containing H1	741.122	-0.345736	0.220392	0.999608
ENSSSCG00000002294	ARG2	arginase 2	87.0281	0.0279361	0.817875	0.999608
ENSSSCG00000002295	VTI1B	vesicle transport through interaction with t-SNAREs 1B	2152.37	0.108661	0.100659	0.999608
ENSSSCG00000002297	RDH12	retinol dehydrogenase 12	16.1783	-0.0436014	0.853253	0.999608
ENSSSCG00000002298	ZFYVE26	zinc finger FYVE-type containing 26	221.658	-0.108764	0.277575	0.999608
ENSSSCG00000002305	EXD2	exonuclease 3'-5' domain containing 2	667.588	0.0232569	0.71556	0.999608
ENSSSCG00000002306	GALNT16	polypeptide N-acetylgalactosaminyltransferase 16	1698.41	0.0125353	0.902802	0.999608
ENSSSCG00000002307	ERH	ERH mRNA splicing and mitosis factor	2195.64	0.0341003	0.653856	0.999608
ENSSSCG00000002309	PLEKHD1	pleckstrin homology and coiled-coil domain containing D1	189.526	0.152671	0.12755	0.999608
ENSSSCG00000002310	CCDC177	coiled-coil domain containing 177	21.1731	0.0360696	0.917772	0.999608
ENSSSCG00000002311	SUSD6	sushi domain containing 6	468.782	-0.00917927	0.907153	0.999608
ENSSSCG00000002313	SLC10A1	solute carrier family 10 member 1	454.459	-0.0532121	0.694429	0.999608
ENSSSCG00000002314	SMOC1	SPARC related modular calcium binding 1	1275.84	-0.148314	0.0959547	0.999608
ENSSSCG00000002315	SLC8A3	solute carrier family 8 member A3	416.674	-0.0855167	0.511002	0.999608
ENSSSCG00000002316	COX16	cytochrome c oxidase assembly protein COX16 homolog, mitochondrial	44.0655	0.00741264	0.967512	0.999608
ENSSSCG00000002322	ADAM21	ADAM metallopeptidase domain 21	0.687239	-1.82011	0.179572	0.999608
ENSSSCG00000002329	MAP3K9	mitogen-activated protein kinase kinase kinase 9	88.6699	0.0641197	0.815967	0.999608
ENSSSCG00000002330	PCNX1	pecanex 1	930.783	0.0382301	0.536946	0.999608
ENSSSCG00000002332	SIPA1L1	signal induced proliferation associated 1 like 1	1401.07	0.0487894	0.468517	0.999608
ENSSSCG00000002333	DPF3	double PHD fingers 3	203.634	-0.0251038	0.838958	0.999608
ENSSSCG00000002337	ZFYVE1	zinc finger FYVE-type containing 1	792.433	0.0312035	0.570983	0.999608
ENSSSCG00000002340	PSEN1	presenilin 1	810.865	-0.0268573	0.710042	0.999608
ENSSSCG00000002341	PAPLN	papilin, proteoglycan like sulfated glycoprotein	39.1426	-0.0465344	0.838931	0.999608
ENSSSCG00000002344	RIOX1	ribosomal oxygenase 1	185.198	0.0491933	0.608455	0.999608
ENSSSCG00000002349	ACOT4	acyl-coenzyme A thioesterase 4	1869.85	0.0701516	0.199012	0.999608
ENSSSCG00000002350	ELMSAN1	ELM2 and Myb/SANT domain containing 1	278.553	-0.000353047	0.997545	0.999608
ENSSSCG00000002352	ZNF410	zinc finger protein 410	262.214	-0.0377082	0.53847	0.999608
ENSSSCG00000002353	FAM161B	FAM161 centrosomal protein B	201.651	-0.0216562	0.827375	0.999608
ENSSSCG00000002354	COQ6	coenzyme Q6, monooxygenase	8.7145	-0.277158	0.389963	0.999608
ENSSSCG00000002355	ENTPD5	ectonucleoside triphosphate diphosphohydrolase 5 (inactive)	232.156	-0.12074	0.215994	0.999608
ENSSSCG00000002356	BBOF1	basal body orientation factor 1	14.8249	-0.148196	0.658776	0.999608
ENSSSCG00000002357	ALDH6A1	aldehyde dehydrogenase 6 family member A1	869.531	0.022534	0.757459	0.999608
ENSSSCG00000002361	VRTN	vertebrae development associated	0.0507656	0.237566	0.939408	0.999608
ENSSSCG00000002363	VSX2	visual system homeobox 2	0.231484	1.47957	0.619937	0.999608
ENSSSCG00000002366	NPC2	NPC intracellular cholesterol transporter 2	791.691	0.121301	0.129305	0.999608
ENSSSCG00000002367	ISCA2	iron-sulfur cluster assembly 2	208.532	0.014591	0.866788	0.999608
ENSSSCG00000002368	LTBP2	latent transforming growth factor beta binding protein 2	223.034	-0.0346276	0.760365	0.999608
ENSSSCG00000002370	AREL1	apoptosis resistant E3 ubiquitin protein ligase 1	1933.56	0.0620076	0.382831	0.999608
ENSSSCG00000002372	YLPM1	YLP motif containing 1	984.21	-0.0630868	0.260107	0.999608
ENSSSCG00000002373	PROX2	prospero homeobox 2	14.2367	0.0458893	0.891201	0.999608
ENSSSCG00000002374	DLST	dihydrolipoamide S-succinyltransferase	306.994	0.0884121	0.672891	0.999608
ENSSSCG00000002375	RPS6KL1	ribosomal protein S6 kinase like 1	903.081	0.0603793	0.458502	0.999608
ENSSSCG00000002377	EIF2B2	eukaryotic translation initiation factor 2B subunit beta	585.025	0.0372526	0.664235	0.999608
ENSSSCG00000002378	MLH3	acylphosphatase 1	161.325	0.118978	0.318565	0.999608
ENSSSCG00000002379	ACYP1	acylphosphatase 1	190.701	0.0805334	0.66126	0.999608
ENSSSCG00000002380	ZC2HC1C	zinc finger C2HC-type containing 1C	31.2352	-0.0414229	0.863652	0.999608
ENSSSCG00000002381	NEK9	NIMA related kinase 9	764.477	-0.0713333	0.171829	0.999608
ENSSSCG00000002383	FOS	Fos proto-oncogene, AP-1 transcription factor subunit	172.678	0.0733895	0.609051	0.999608
ENSSSCG00000002385	TGFB3	transforming growth factor beta 3	112.321	-0.174443	0.193313	0.999608
ENSSSCG00000002387	GPATCH2L	G-patch domain containing 2 like	17.4223	-0.186727	0.597005	0.999608
ENSSSCG00000002388	ESRRB	estrogen related receptor beta	5.68385	0.7553	0.0878338	0.999608
ENSSSCG00000002389	VASH1	vasohibin 1	1200.96	-0.00774868	0.938718	0.999608
ENSSSCG00000002390	ANGEL1	angel homolog 1	375	0.107101	0.104681	0.999608
ENSSSCG00000002391	LRRC74A	leucine rich repeat containing 74A	0.970779	0.821551	0.528057	0.999608
ENSSSCG00000002396	GSTZ1	glutathione S-transferase zeta 1	307.641	0.0545016	0.58665	0.999608
ENSSSCG00000002397	POMT2	protein O-mannosyltransferase 2	385.721	-0.0430312	0.58021	0.999608
ENSSSCG00000002398	TMEM63C	transmembrane protein 63C	668.218	0.121957	0.220329	0.999608
ENSSSCG00000002399	NGB	neuroglobin	95.3767	0.10272	0.451857	0.999608
ENSSSCG00000002403	VIPAS39	VPS33B interacting protein, apical-basolateral polarity regulator, spe-39 homolog	278.612	0.133349	0.218475	0.999608
ENSSSCG00000002404	SPTLC2	serine palmitoyltransferase long chain base subunit 2	701.42	-0.0732684	0.276172	0.999608
ENSSSCG00000002406	AHSA1	activator of HSP90 ATPase activity 1	3098.38	0.108604	0.157541	0.999608
ENSSSCG00000002408	ADCK1	aarF domain containing kinase 1	70.9479	0.154997	0.42493	0.999608
ENSSSCG00000002410	CEP128	centrosomal protein 128	56.8057	-0.144186	0.319363	0.999608
ENSSSCG00000002411	GTF2A1	general transcription factor IIA subunit 1	785.101	-0.0653567	0.183941	0.999608
ENSSSCG00000002412	STON2	stonin 2	279.903	0.0728598	0.520774	0.999608
ENSSSCG00000002414	SEL1L	SEL1L adaptor subunit of ERAD E3 ubiquitin ligase	1137.28	-0.0783733	0.239123	0.999608
ENSSSCG00000002423	KCNK10	potassium two pore domain channel subfamily K member 10	566.629	-0.0045971	0.968079	0.999608
ENSSSCG00000002425	PTPN21	protein tyrosine phosphatase non-receptor type 21	249.994	-0.180313	0.121331	0.999608
ENSSSCG00000002426	ZC3H14	zinc finger CCCH-type containing 14	778.994	-0.0712256	0.276475	0.999608
ENSSSCG00000002427	EML5	EMAP like 5	167.505	-0.00353019	0.978227	0.999608
ENSSSCG00000002428	TTC8	tetratricopeptide repeat domain 8	408.377	0.0213879	0.767848	0.999608
ENSSSCG00000002429	FOXN3	forkhead box N3	97.6452	-0.0433531	0.80905	0.999608
ENSSSCG00000002430	EFCAB11	EF-hand calcium binding domain 11	89.4023	-0.207232	0.047148	0.999608
ENSSSCG00000002431	TDP1	tyrosyl-DNA phosphodiesterase 1	196.682	0.0716295	0.442092	0.999608
ENSSSCG00000002432	KCNK13	potassium two pore domain channel subfamily K member 13	24.3944	0.241275	0.288014	0.999608
ENSSSCG00000002433	PSMC1	proteasome 26S subunit, ATPase 1	1814.4	0.150946	0.0156856	0.999608
ENSSSCG00000002434	NRDE2	NRDE-2, necessary for RNA interference, domain containing	139.399	0.0157751	0.890682	0.999608
ENSSSCG00000002436	TTC7B	tetratricopeptide repeat domain 7B	1670.95	0.0514736	0.226585	0.999608
ENSSSCG00000002440	CCDC88C	coiled-coil domain containing 88C	471.037	-0.193435	0.104055	0.999608
ENSSSCG00000002441	PPP4R3A	protein phosphatase 4 regulatory subunit 3A	772.242	-0.00264579	0.966665	0.999608
ENSSSCG00000002442	CATSPERB	cation channel sperm associated auxiliary subunit beta	0.288683	1.75741	0.46205	0.999608
ENSSSCG00000002443	TC2N	tandem C2 domains, nuclear	14.4517	-0.147366	0.748269	0.999608
ENSSSCG00000002444	FBLN5	fibulin 5	96.8624	0.131028	0.510686	0.999608
ENSSSCG00000002445	TRIP11	thyroid hormone receptor interactor 11	326.802	-0.114664	0.142903	0.999608
ENSSSCG00000002447	CPSF2	cleavage and polyadenylation specific factor 2	776.848	0.0364534	0.452245	0.999608
ENSSSCG00000002450	SLC24A4	solute carrier family 24 member 4	84.0411	-0.0565626	0.777667	0.999608
ENSSSCG00000002452	LGMN	legumain	807.432	-0.072843	0.505706	0.999608
ENSSSCG00000002455	GOLGA5	golgin A5	439.241	0.0133664	0.814314	0.999608
ENSSSCG00000002457	ITPK1	inositol-tetrakisphosphate 1-kinase	1442.03	0.0795906	0.282316	0.999608
ENSSSCG00000002458	TMEM251	transmembrane protein 251	190.871	0.140208	0.122824	0.999608
ENSSSCG00000002461	BTBD7	BTB domain containing 7	360.44	-0.130758	0.0202912	0.999608
ENSSSCG00000002467	ASB2	ankyrin repeat and SOCS box containing 2	364.663	0.101427	0.300069	0.999608
ENSSSCG00000002469	OTUB2	OTU deubiquitinase, ubiquitin aldehyde binding 2	153.694	0.126886	0.281443	0.999608
ENSSSCG00000002470	DDX24	DEAD-box helicase 24	2672.86	0.055307	0.331347	0.999608
ENSSSCG00000002474	PPP4R4	protein phosphatase 4 regulatory subunit 4	407.59	0.154591	0.203665	0.999608
ENSSSCG00000002475	SERPINA6	serpin family A member 6	18.8346	0.0818293	0.737642	0.999608
ENSSSCG00000002476	SERPINA1	serpin family A member 1	6.00423	-0.113964	0.837594	0.999608
ENSSSCG00000002481	SERPINA5	serpin family A member 5	8.87548	-0.181295	0.587427	0.999608
ENSSSCG00000002490	GSC	goosecoid homeobox	0.503829	0.99626	0.551508	0.999608
ENSSSCG00000002494	CLMN	calmin	84.1182	-0.0750231	0.718143	0.999608
ENSSSCG00000002495	SYNE3	spectrin repeat containing nuclear envelope family member 3	41.7206	-0.148521	0.455074	0.999608
ENSSSCG00000002496	GLRX5	glutaredoxin 5	1104.46	0.0592	0.513073	0.999608
ENSSSCG00000002501	BDKRB1	bradykinin receptor B1	0.366323	0.335581	0.88347	0.999608
ENSSSCG00000002502	ATG2B	autophagy related 2B	372.681	-0.0657914	0.496172	0.999608
ENSSSCG00000002504	AK7	adenylate kinase 7	167.3	-0.359563	0.303374	0.999608
ENSSSCG00000002505	PAPOLA	poly(A) polymerase alpha	1224.79	0.016792	0.841573	0.999608
ENSSSCG00000002506	VRK1	VRK serine/threonine kinase 1	277.396	0.104112	0.545244	0.999608
ENSSSCG00000002507	BCL11B	BAF chromatin remodeling complex subunit BCL11B	130.399	-0.158333	0.50122	0.999608
ENSSSCG00000002508	SETD3	SET domain containing 3, actin histidine methyltransferase	2360.67	-0.0584261	0.202254	0.999608
ENSSSCG00000002509	CCNK	cyclin K	529.897	0.0225511	0.77911	0.999608
ENSSSCG00000002510	CYP46A1	cholesterol 24-hydroxylase	3645.19	0.0562278	0.551039	0.999608
ENSSSCG00000002512	DEGS2	delta 4-desaturase, sphingolipid 2	141.744	-0.0162807	0.907417	0.999608
ENSSSCG00000002515	SLC25A47	solute carrier family 25 member 47	71.5439	-0.00269168	0.990165	0.999608
ENSSSCG00000002516	WARS1	tryptophanyl-tRNA synthetase 1	1739.37	0.0265689	0.770871	0.999608
ENSSSCG00000002517	WDR25	WD repeat domain 25	226.765	0.0531242	0.518762	0.999608
ENSSSCG00000002520	SLC25A29	solute carrier family 25 member 29	1626.54	-0.193878	0.115771	0.999608
ENSSSCG00000002573	RTL1	retrotransposon Gag like 1	11.2929	0.197994	0.493872	0.999608
ENSSSCG00000002620	EFHC1	EF-hand domain containing 1	323.354	-0.257427	0.0983517	0.999608
ENSSSCG00000002622	TMEM14A	transmembrane protein 14A	694.915	0.171869	0.0757005	0.999608
ENSSSCG00000002623	GSTA1	glutathione S-transferase alpha 1	14.2633	-0.0150841	0.968133	0.999608
ENSSSCG00000002627	GSTA4	glutathione S-transferase alpha 4	5616.16	0.164505	0.014187	0.999608
ENSSSCG00000002628	ICK	ciliogenesis associated kinase 1	383.189	-0.131705	0.096236	0.999608
ENSSSCG00000002629	FBXO9	F-box protein 9	1381.24	0.0818202	0.276278	0.999608
ENSSSCG00000002632	SLC28A1	solute carrier family 28 member 1	0.223384	-0.791854	0.756547	0.999608
ENSSSCG00000002633	GAS8	growth arrest specific 8	527.656	0.00236506	0.98036	0.999608
ENSSSCG00000002635	SPIRE2	spire type actin nucleation factor 2	1941.75	-0.00552563	0.914483	0.999608
ENSSSCG00000002640	DEF8	differentially expressed in FDCP 8 homolog	1969.16	-0.0255563	0.724325	0.999608
ENSSSCG00000002642	CDH15	cadherin 15	26.6224	-0.091548	0.722552	0.999608
ENSSSCG00000002645	GALNS	galactosamine (N-acetyl)-6-sulfatase	943.073	-0.0307362	0.842654	0.999608
ENSSSCG00000002648	CBFA2T3	CBFA2/RUNX1 partner transcriptional co-repressor 3	114.467	0.0969875	0.523437	0.999608
ENSSSCG00000002650	APRT	adenine phosphoribosyltransferase	1198.6	0.0246815	0.831901	0.999608
ENSSSCG00000002652	KLHDC4	kelch domain containing 4	893.571	-0.025721	0.766075	0.999608
ENSSSCG00000002654	FBXO31	F-box protein 31	2172.61	0.0171086	0.739308	0.999608
ENSSSCG00000002655	MAP1LC3B	microtubule associated protein 1 light chain 3 beta	4126.27	0.0723473	0.207104	0.999608
ENSSSCG00000002656	ZCCHC14	zinc finger CCHC-type containing 14	316.452	0.0614813	0.692004	0.999608
ENSSSCG00000002658	FOXL1	forkhead box L1	4.11596	0.0910623	0.83899	0.999608
ENSSSCG00000002660	MTHFSD	methenyltetrahydrofolate synthetase domain containing	474.715	-0.0470951	0.624568	0.999608
ENSSSCG00000002664	GSE1	Gse1 coiled-coil protein	391.815	-0.0199387	0.875851	0.999608
ENSSSCG00000002666	KIAA0513	KIAA0513 ortholog	2760.28	0.00582514	0.947512	0.999608
ENSSSCG00000002667	ZDHHC7	zinc finger DHHC-type containing 7	1265.79	0.0523355	0.317515	0.999608
ENSSSCG00000002668	FAM92B	family with sequence similarity 92 member B	1.95037	-0.255009	0.749369	0.999608
ENSSSCG00000002669	CRISPLD2	cysteine rich secretory protein LCCL domain containing 2	106.047	0.0819584	0.641858	0.999608
ENSSSCG00000002670	USP10	ubiquitin specific peptidase 10	934.274	-0.0188861	0.672943	0.999608
ENSSSCG00000002671	ATP2C2	ATPase secretory pathway Ca2+ transporting 2	25.3981	0.150358	0.457483	0.999608
ENSSSCG00000002672	MEAK7	MTOR associated protein, eak-7 homolog	254.766	0.132518	0.15444	0.999608
ENSSSCG00000002675	DNAAF1	dynein axonemal assembly factor 1	62.7489	0.0188204	0.912406	0.999608
ENSSSCG00000002680	TAF1C	TATA-box binding protein associated factor, RNA polymerase I subunit C	421.879	0.00224898	0.985788	0.999608
ENSSSCG00000002681	HSDL1	hydroxysteroid dehydrogenase like 1	775.212	-0.0105982	0.91628	0.999608
ENSSSCG00000002682	MBTPS1	membrane bound transcription factor peptidase, site 1	1400.65	0.0253293	0.706171	0.999608
ENSSSCG00000002684	CDH13	cadherin 13	1914.39	0.0957298	0.405155	0.999608
ENSSSCG00000002688	PLCG2	phospholipase C gamma 2	87.4301	-0.0468993	0.737367	0.999608
ENSSSCG00000002689	CMIP	c-Maf inducing protein	2641.86	0.15115	0.232281	0.999608
ENSSSCG00000002690	GAN	gigaxonin	22.4519	-0.108712	0.714163	0.999608
ENSSSCG00000002696	VAT1L	vesicle amine transport 1 like	1630.09	0.0901276	0.519201	0.999608
ENSSSCG00000002697	NUDT7	nudix hydrolase 7	368.194	-0.063323	0.718086	0.999608
ENSSSCG00000002701	MON1B	MON1 homolog B, secretory trafficking associated	996.38	-0.0577454	0.449264	0.999608
ENSSSCG00000002703	TERF2IP	TERF2 interacting protein	2684.88	0.0265361	0.694216	0.999608
ENSSSCG00000002704	KARS1	lysyl-tRNA synthetase 1	2820.32	0.0903319	0.203411	0.999608
ENSSSCG00000002706	ADAT1	adenosine deaminase tRNA specific 1	58.9132	-0.0605896	0.6693	0.999608
ENSSSCG00000002707	GABARAPL2	GABA type A receptor associated protein like 2	3426.5	0.0272278	0.690028	0.999608
ENSSSCG00000002708	TMEM231	transmembrane protein 231	209.364	-0.178925	0.0956861	0.999608
ENSSSCG00000002712	LDHD	lactate dehydrogenase D	135.581	0.189752	0.0913737	0.999608
ENSSSCG00000002714	WDR59	WD repeat domain 59	296.659	-0.158693	0.0876426	0.999608
ENSSSCG00000002715	RFWD3	ring finger and WD repeat domain 3	119.699	-0.071401	0.523234	0.999608
ENSSSCG00000002716	MLKL	mixed lineage kinase domain like pseudokinase	39.853	-0.0365023	0.85316	0.999608
ENSSSCG00000002718	FA2H	fatty acid 2-hydroxylase	960.79	-0.236256	0.417316	0.999608
ENSSSCG00000002719	EXOSC6	exosome component 6	225.857	0.021067	0.807487	0.999608
ENSSSCG00000002723	AARS1	alanyl-tRNA synthetase 1	4301.9	0.0656398	0.361213	0.999608
ENSSSCG00000002724	PDPR	pyruvate dehydrogenase phosphatase regulatory subunit	858.244	-0.0215496	0.763239	0.999608
ENSSSCG00000002729	VAC14	VAC14 component of PIKFYVE complex	901.675	0.117237	0.0301298	0.999608
ENSSSCG00000002730	CALB2	calbindin 2	958.839	0.202044	0.325368	0.999608
ENSSSCG00000002734	MARVELD3	MARVEL domain containing 3	2.27834	-0.303731	0.653037	0.999608
ENSSSCG00000002736	TAT	tyrosine aminotransferase	0.531052	0.0305839	0.98554	0.999608
ENSSSCG00000002737	CHST4	carbohydrate sulfotransferase 4	5.80288	-0.132604	0.810903	0.999608
ENSSSCG00000002738	ZNF23	zinc finger protein 19	241.467	-0.0812171	0.450721	0.999608
ENSSSCG00000002739	PHLPP2	PH domain and leucine rich repeat protein phosphatase 2	475.904	0.0203224	0.775286	0.999608
ENSSSCG00000002740	AP1G1	adaptor related protein complex 1 subunit gamma 1	1661.21	0.0329671	0.585819	0.999608
ENSSSCG00000002741	ZNF821	zinc finger protein 821	773.238	0.0898677	0.31455	0.999608
ENSSSCG00000002743	IST1	IST1 factor associated with ESCRT-III	1552.97	0.0189733	0.762269	0.999608
ENSSSCG00000002746	DHODH	dihydroorotate dehydrogenase (quinone)	119.181	0.220873	0.0613235	0.999608
ENSSSCG00000002747	PMFBP1	polyamine modulated factor 1 binding protein 1	41.6378	0.00983326	0.955792	0.999608
ENSSSCG00000002748	DHX38	DEAH-box helicase 38	430.769	0.0258559	0.709741	0.999608
ENSSSCG00000002752	ZFHX3	zinc finger homeobox 3	25.8416	-0.325209	0.197888	0.999608
ENSSSCG00000002753	NOB1	NIN1 (RPN12) binding protein 1 homolog	609.673	0.0996951	0.236134	0.999608
ENSSSCG00000002754	NQO1	NAD(P)H quinone dehydrogenase 1	316.701	-0.0567756	0.435038	0.999608
ENSSSCG00000002755	NFAT5	nuclear factor of activated T cells 5	105.006	-0.0749681	0.66956	0.999608
ENSSSCG00000002762	TERF2	telomeric repeat binding factor 2	1052.18	0.0570402	0.36179	0.999608
ENSSSCG00000002763	PRMT7	protein arginine methyltransferase 7	976.644	-0.00227818	0.9677	0.999608
ENSSSCG00000002764	SMPD3	sphingomyelin phosphodiesterase 3	2068.97	0.0608358	0.46343	0.999608
ENSSSCG00000002767	TSNAXIP1	translin associated factor X interacting protein 1	335.541	-0.115251	0.213366	0.999608
ENSSSCG00000002769	THAP11	THAP domain containing 11	802.319	-0.0193434	0.716342	0.999608
ENSSSCG00000002774	RIPOR1	RHO family interacting cell polarization regulator 1	1015.32	0.0179784	0.789645	0.999608
ENSSSCG00000002775	AGRP	agouti related neuropeptide	1.42638	0.33202	0.68321	0.999608
ENSSSCG00000002777	HSD11B2	hydroxysteroid 11-beta dehydrogenase 2	16.5197	0.0309173	0.906506	0.999608
ENSSSCG00000002778	ZDHHC1	zinc finger DHHC-type containing 1	21.0624	0.164886	0.536461	0.999608
ENSSSCG00000002779	LRRC36	leucine rich repeat containing 36	81.056	-0.0379094	0.803888	0.999608
ENSSSCG00000002783	SLC9A5	solute carrier family 9 member A5	635.128	0.00294172	0.985177	0.999608
ENSSSCG00000002786	ELMO3	engulfment and cell motility 3	96.5696	-0.163904	0.333184	0.999608
ENSSSCG00000002787	E2F4	E2F transcription factor 4	541.849	0.0400998	0.50145	0.999608
ENSSSCG00000002788	EXOC3L1	exocyst complex component 3 like 1	2.48549	-0.368569	0.553013	0.999608
ENSSSCG00000002790	TMEM208	transmembrane protein 208	733.478	0.0873931	0.415598	0.999608
ENSSSCG00000002792	HSF4	heat shock factor protein 4	18.5458	-0.278382	0.434489	0.999608
ENSSSCG00000002795	CDH11	cadherin 11	1768.03	-0.0489711	0.486842	0.999608
ENSSSCG00000002799	CNOT1	CCR4-NOT transcription complex subunit 1	605.384	0.00783147	0.956886	0.999608
ENSSSCG00000002802	GINS3	GINS complex subunit 3	85.5392	0.106862	0.403206	0.999608
ENSSSCG00000002803	CCDC113	coiled-coil domain containing 113	68.3212	-0.213081	0.312856	0.999608
ENSSSCG00000002804	CSNK2A2	casein kinase 2 alpha 2	1375.22	0.0661258	0.146954	0.999608
ENSSSCG00000002805	CFAP20	cilia and flagella associated protein 20	955.7	0.0143127	0.839409	0.999608
ENSSSCG00000002806	MMP15	matrix metallopeptidase 15	1051.91	0.0536197	0.422935	0.999608
ENSSSCG00000002807	USB1	U6 snRNA biogenesis phosphodiesterase 1	261.184	0.0106955	0.867349	0.999608
ENSSSCG00000002808	ZNF319	zinc finger protein 319	207.428	0.0260377	0.739295	0.999608
ENSSSCG00000002809	TEPP	testis, prostate and placenta expressed	0.419421	0.924004	0.594112	0.999608
ENSSSCG00000002812	KIFC3	kinesin family member C3	755.379	0.0741884	0.314905	0.999608
ENSSSCG00000002813	KATNB1	katanin regulatory subunit B1	1158.1	0.0752299	0.235334	0.999608
ENSSSCG00000002814	ADGRG3	adhesion G protein-coupled receptor G3	8.7822	0.00847331	0.983497	0.999608
ENSSSCG00000002815	ADGRG1	adhesion G protein-coupled receptor G1	3886.24	0.0454755	0.549487	0.999608
ENSSSCG00000002817	DRC7	dynein regulatory complex subunit 7	154.545	-0.29341	0.281498	0.999608
ENSSSCG00000002818	PLLP	plasmolipin	3609.44	-0.239959	0.330237	0.999608
ENSSSCG00000002819	ARL2BP	ADP ribosylation factor like GTPase 2 binding protein	282.496	0.114949	0.470809	0.999608
ENSSSCG00000002820	RSPRY1	ring finger and SPRY domain containing 1	372.181	0.0241493	0.745273	0.999608
ENSSSCG00000002821	CCL22	C-C motif chemokine ligand 22	0.0831374	-0.529552	0.86545	0.999608
ENSSSCG00000002822	AMFR	autocrine motility factor receptor	2419.34	0.0138281	0.82634	0.999608
ENSSSCG00000002827	SLC6A2	solute carrier family 6 member 2	8.15808	-0.129797	0.780564	0.999608
ENSSSCG00000002828	LPCAT2	lysophosphatidylcholine acyltransferase 2	199.29	-0.0339555	0.767092	0.999608
ENSSSCG00000002829	MMP2	matrix metallopeptidase 2	719.065	-0.0301717	0.809019	0.999608
ENSSSCG00000002830	IRX6	iroquois homeobox 6	111.515	0.0983659	0.608647	0.999608
ENSSSCG00000002831	IRX3	iroquois homeobox 3	23.7277	0.328869	0.281499	0.999608
ENSSSCG00000002835	TOX3	TOX high mobility group box family member 3	172.623	-0.161623	0.192312	0.999608
ENSSSCG00000002836	SALL1	spalt like transcription factor 1	563.03	-0.101862	0.453456	0.999608
ENSSSCG00000002838	ZNF423	zinc finger protein 423	617.219	0.068681	0.430959	0.999608
ENSSSCG00000002841	N4BP1	NEDD4 binding protein 1	220.3	0.00774618	0.93076	0.999608
ENSSSCG00000002844	PHKB	phosphorylase kinase regulatory subunit beta	1225.71	0.0121681	0.858627	0.999608
ENSSSCG00000002846	DNAJA2	DnaJ heat shock protein family (Hsp40) member A2	1754.59	0.0317666	0.551241	0.999608
ENSSSCG00000002847	GPT2	glutamic--pyruvic transaminase 2	2208.93	-0.124977	0.445874	0.999608
ENSSSCG00000002849	SHCBP1	SHC binding and spindle associated 1	33.2436	0.0618671	0.767116	0.999608
ENSSSCG00000002852	PLEKHF1	pleckstrin homology and FYVE domain containing 1	49.7666	-0.052528	0.727081	0.999608
ENSSSCG00000002854	POP4	POP4 homolog, ribonuclease P/MRP subunit	333.22	-0.000565306	0.993987	0.999608
ENSSSCG00000002859	ANKRD27	ankyrin repeat domain 27	435.252	-0.0569418	0.457873	0.999608
ENSSSCG00000002860	PDCD5	programmed cell death 5	1187.56	0.0777045	0.414546	0.999608
ENSSSCG00000002863	LRP3	LDL receptor related protein 3	2667.39	0.0650023	0.348097	0.999608
ENSSSCG00000002864	SLC7A10	solute carrier family 7 member 10	295.876	0.0831332	0.63414	0.999608
ENSSSCG00000002865	GPATCH1	G-patch domain containing 1	294.151	0.0931097	0.143335	0.999608
ENSSSCG00000002866	CEBPA	CCAAT enhancer binding protein alpha	267.39	-0.0694281	0.451504	0.999608
ENSSSCG00000002867	CEBPG	CCAAT enhancer binding protein gamma	550.341	0.00482566	0.933084	0.999608
ENSSSCG00000002868	PEPD	peptidase D	1163.59	0.0444266	0.631667	0.999608
ENSSSCG00000002869	LSM14A	LSM14A mRNA processing body assembly factor	1207.95	-0.0862602	0.1275	0.999608
ENSSSCG00000002872	KIAA0355	KIAA0355 ortholog	282.223	-0.194463	0.0901462	0.999608
ENSSSCG00000002873	GPI	glucose-6-phosphate isomerase	12150.5	0.135889	0.0319097	0.999608
ENSSSCG00000002884	LSR	lipolysis stimulated lipoprotein receptor	192.749	0.035251	0.794593	0.999608
ENSSSCG00000002885	USF2	upstream transcription factor 2, c-fos interacting	2728.17	0.00995282	0.888953	0.999608
ENSSSCG00000002887	MAG	myelin associated glycoprotein	12547	-0.358459	0.246354	0.999608
ENSSSCG00000002888	GAPDHS	glyceraldehyde-3-phosphate dehydrogenase, spermatogenic	127.463	0.0768703	0.558387	0.999608
ENSSSCG00000002893	CD22	CD22 molecule	18.3057	-0.0772538	0.779525	0.999608
ENSSSCG00000002895	KMT2B	lysine methyltransferase 2B	621.06	-0.0469957	0.592568	0.999608
ENSSSCG00000002898	LIN37	lin-37 DREAM MuvB core complex component	382.045	0.131914	0.282726	0.999608
ENSSSCG00000002901	UPK1A	uroplakin 1A	0.224311	-0.227649	0.928903	0.999608
ENSSSCG00000002902	ATP4A	ATPase H+/K+ transporting subunit alpha	0.093457	0.0346495	0.991154	0.999608
ENSSSCG00000002904	HAUS5	HAUS augmin like complex subunit 5	287.254	-0.14192	0.0664833	0.999608
ENSSSCG00000002905	RBM42	RNA binding motif protein 42	1543.37	0.0272515	0.695656	0.999608
ENSSSCG00000002906	ETV2	ETS variant transcription factor 2	56.7071	0.0379702	0.826351	0.999608
ENSSSCG00000002908	ZBTB32	zinc finger and BTB domain containing 32	2.14183	-1.40821	0.083709	0.999608
ENSSSCG00000002910	ALKBH6	alkB homolog 6	696.777	0.0895325	0.281432	0.999608
ENSSSCG00000002915	KIRREL2	kirre like nephrin family adhesion molecule 2	19.1693	0.230373	0.415227	0.999608
ENSSSCG00000002916	APLP1	amyloid beta precursor like protein 1	21039.8	-0.0109199	0.875708	0.999608
ENSSSCG00000002917	NFKBID	NFKB inhibitor delta	106.79	-0.0986126	0.533381	0.999608
ENSSSCG00000002919	TYROBP	TYRO protein tyrosine kinase binding protein	195.478	0.0148047	0.935012	0.999608
ENSSSCG00000002921	CLIP3	CAP-Gly domain containing linker protein 3	9028.71	0.0675487	0.177286	0.999608
ENSSSCG00000002923	WDR62	WD repeat domain 62	121.875	0.025818	0.838509	0.999608
ENSSSCG00000002926	TBCB	tubulin folding cofactor B	1616.11	0.107406	0.324761	0.999608
ENSSSCG00000002927	LRFN3	leucine rich repeat and fibronectin type III domain containing 3	501.45	0.0982408	0.265498	0.999608
ENSSSCG00000002929	SYNE4	spectrin repeat containing nuclear envelope family member 4	0.74575	0.471417	0.733982	0.999608
ENSSSCG00000002930	ZNF260	zinc finger protein 260	431.548	-0.139668	0.0231034	0.999608
ENSSSCG00000002931	ZNF565	zinc finger protein 565	112.062	-0.0185089	0.881908	0.999608
ENSSSCG00000002932	ZNF567	zinc finger protein 567	312.619	-0.0403689	0.728856	0.999608
ENSSSCG00000002933	ZNF382	zinc finger protein 382	102.653	0.0613733	0.536269	0.999608
ENSSSCG00000002944	WDR87	WD repeat domain 87	4.44814	-0.44024	0.434284	0.999608
ENSSSCG00000002952	YIF1B	Yip1 interacting factor homolog B, membrane trafficking protein	304.636	0.180018	0.0966415	0.999608
ENSSSCG00000002954	SPINT2	serine peptidase inhibitor, Kunitz type 2	402.947	-0.0258789	0.853441	0.999608
ENSSSCG00000002955	CATSPERG	cation channel sperm associated auxiliary subunit gamma	711.808	-0.0172609	0.906432	0.999608
ENSSSCG00000002957	GGN	gametogenetin	75.7311	-0.100988	0.473442	0.999608
ENSSSCG00000002959	FAM98C	family with sequence similarity 98 member C	474.761	0.0571212	0.631284	0.999608
ENSSSCG00000002960	RASGRP4	RAS guanyl releasing protein 4	52.0904	-0.020981	0.896167	0.999608
ENSSSCG00000002962	MAP4K1	mitogen-activated protein kinase kinase kinase kinase 1	54.0246	0.0446178	0.821262	0.999608
ENSSSCG00000002965	ACTN4	actinin alpha 4	2612	-0.0624967	0.592163	0.999608
ENSSSCG00000002967	CAPN12	calpain 12	222.251	0.146907	0.630392	0.999608
ENSSSCG00000002971	ACP7	acid phosphatase 7, tartrate resistant (putative)	21.2209	-0.180049	0.702425	0.999608
ENSSSCG00000002978	PSP-II	porcine seminal protein I	0.0843514	-0.420674	0.892926	0.999608
ENSSSCG00000002986	SELENOV	selenoprotein V	8.32911	0.051915	0.879596	0.999608
ENSSSCG00000002987	DLL3	delta like canonical Notch ligand 3	223.93	-0.0975539	0.564217	0.999608
ENSSSCG00000002988	ZNF546	zinc finger protein 546	205.515	-0.117018	0.294015	0.999608
ENSSSCG00000002989	AKT2	AKT serine/threonine kinase 2	1528.91	-0.0404764	0.436795	0.999608
ENSSSCG00000002990	CNTD2	cyclin N-terminal domain containing 2	4.24312	-0.253564	0.600659	0.999608
ENSSSCG00000002993	CYP2A19	cytochrome P450 2A19	196.524	0.0336839	0.852749	0.999608
ENSSSCG00000002994	CYP2F1	cytochrome P450 2F3	24.5595	-0.351812	0.129199	0.999608
ENSSSCG00000002998	SNRPA	small nuclear ribonucleoprotein polypeptide A	641.871	-0.000682005	0.994259	0.999608
ENSSSCG00000003000	ITPKC	inositol-trisphosphate 3-kinase C	200.044	0.0830424	0.374851	0.999608
ENSSSCG00000003006	CYP2B22	cytochrome P450 2B4-like	3.04164	-0.0697436	0.903512	0.999608
ENSSSCG00000003013	B9D2	B9 domain containing 2	513.668	0.142384	0.260858	0.999608
ENSSSCG00000003015	EXOSC5	exosome component 5	1045.27	0.125585	0.327582	0.999608
ENSSSCG00000003016	CCDC97	coiled-coil domain containing 97	691.602	-0.0530746	0.373429	0.999608
ENSSSCG00000003017	TGFB1	transforming growth factor beta 1	765.89	0.138208	0.168274	0.999608
ENSSSCG00000003018	LIPE	lipase E, hormone sensitive type	154.68	-0.114756	0.319569	0.999608
ENSSSCG00000003021	MEGF8	multiple EGF like domains 8	1033.09	-0.0672618	0.500205	0.999608
ENSSSCG00000003022	TMEM145	transmembrane protein 145	1166.24	0.0617729	0.444063	0.999608
ENSSSCG00000003024	PRR19	proline rich 19	100.844	-0.0732879	0.671783	0.999608
ENSSSCG00000003030	CIC	capicua transcriptional repressor	2330.64	-0.00664913	0.936776	0.999608
ENSSSCG00000003038	GRIK5	glutamate ionotropic receptor kainate type subunit 5	2582.2	0.0345191	0.55543	0.999608
ENSSSCG00000003040	ARHGEF1	Rho guanine nucleotide exchange factor 1	9.18692	0.721239	0.0260072	0.999608
ENSSSCG00000003043	DMRTC2	DMRT like family C2	4.48824	-0.175868	0.728699	0.999608
ENSSSCG00000003044	LYPD4	LY6/PLAUR domain containing 4	28.639	0.110061	0.716424	0.999608
ENSSSCG00000003046	RABAC1	Rab acceptor 1	2751.36	0.091456	0.393082	0.999608
ENSSSCG00000003049	ERFL	ETS repressor factor like	10.998	-0.283334	0.297878	0.999608
ENSSSCG00000003051	CD177	CD177 molecule	0.523442	1.02735	0.495755	0.999608
ENSSSCG00000003052	TEX101	testis expressed 101	0.38501	0.191743	0.903407	0.999608
ENSSSCG00000003053	BSP1	binder of sperm 1	0.247422	1.00964	0.684619	0.999608
ENSSSCG00000003054	ZNF575	zinc finger protein 575	316.527	0.152758	0.183234	0.999608
ENSSSCG00000003055	XRCC1	X-ray repair cross complementing 1	515.444	0.070049	0.514813	0.999608
ENSSSCG00000003059	ZNF428	zinc finger protein 428	1295.52	0.172757	0.155526	0.999608
ENSSSCG00000003061	CADM4	cell adhesion molecule 4	7327.4	-0.0125101	0.889694	0.999608
ENSSSCG00000003062	LYPD3	LY6/PLAUR domain containing 3	4.2229	-0.807613	0.0692306	0.999608
ENSSSCG00000003063	PHLDB3	pleckstrin homology like domain family B member 3	20.8202	0.479994	0.0661965	0.999608
ENSSSCG00000003064	ETHE1	ETHE1 persulfide dioxygenase	247.709	0.0789762	0.350679	0.999608
ENSSSCG00000003066	IRGC	immunity-related GTPase family, cinema	4.03804	0.226187	0.631947	0.999608
ENSSSCG00000003068	SMG9	SMG9 nonsense mediated mRNA decay factor	544.473	0.0694078	0.431426	0.999608
ENSSSCG00000003069	KCNN4	potassium calcium-activated channel subfamily N member 4	14.3967	0.0527057	0.871549	0.999608
ENSSSCG00000003070	ZNF45	zinc finger protein 45	291.594	0.0040916	0.954871	0.999608
ENSSSCG00000003071	ZNF404	zinc finger protein 404	45.4451	0.126291	0.486051	0.999608
ENSSSCG00000003072	ZNF283	zinc finger protein 283	150.327	0.0371226	0.820358	0.999608
ENSSSCG00000003073	LYPD5	LY6/PLAUR domain containing 5	0.152144	0.413603	0.894708	0.999608
ENSSSCG00000003078	CEACAM19	CEA cell adhesion molecule 19	46.9317	0.0801212	0.859014	0.999608
ENSSSCG00000003081	CEACAM16	CEA cell adhesion molecule 16, tectorial membrane component	23.4734	-0.119627	0.665814	0.999608
ENSSSCG00000003083	CBLC	Cbl proto-oncogene C	0.317833	0.840851	0.677923	0.999608
ENSSSCG00000003085	CLPTM1	CLPTM1 regulator of GABA type A receptor forward trafficking	2418.96	0.0288651	0.596614	0.999608
ENSSSCG00000003088	APOE	apolipoprotein E	60250	-0.0554802	0.59355	0.999608
ENSSSCG00000003089	TOMM40	translocase of outer mitochondrial membrane 40	2487.88	0.129866	0.0227411	0.999608
ENSSSCG00000003091	IRF2BP1	interferon regulatory factor 2 binding protein 1	1289.31	0.0970792	0.0785464	0.999608
ENSSSCG00000003092	FOXA3	forkhead box A3	2.17547	-1.22268	0.101346	0.999608
ENSSSCG00000003093	SYMPK	symplekin	346.846	0.0673833	0.514446	0.999608
ENSSSCG00000003098	PPP5C	serine/threonine-protein phosphatase 5	2248.13	0.114101	0.045524	0.999608
ENSSSCG00000003100	CCDC61	coiled-coil domain containing 61	652.285	0.0380025	0.722734	0.999608
ENSSSCG00000003101	HIF3A	hypoxia inducible factor 3 subunit alpha	283.193	-0.10101	0.416692	0.999608
ENSSSCG00000003103	FKRP	fukutin related protein	447.413	-0.0398104	0.539152	0.999608
ENSSSCG00000003104	STRN4	striatin 4	3782.14	0.0330607	0.645913	0.999608
ENSSSCG00000003105	SLC1A5	solute carrier family 1 member 5	280.22	-0.100365	0.279201	0.999608
ENSSSCG00000003106	AP2S1	adaptor related protein complex 2 subunit sigma 1	3726.07	0.170757	0.0663167	0.999608
ENSSSCG00000003107	ARHGAP35	Rho GTPase activating protein 35	3524.98	0.0144581	0.881769	0.999608
ENSSSCG00000003108	NPAS1	neuronal PAS domain protein 1	302.57	0.177657	0.160059	0.999608
ENSSSCG00000003109	TMEM160	transmembrane protein 160	2216.87	0.0954397	0.418206	0.999608
ENSSSCG00000003110	ZC3H4	zinc finger CCCH-type containing 4	594.207	0.00454498	0.960826	0.999608
ENSSSCG00000003111	SAE1	SUMO1 activating enzyme subunit 1	1469.38	0.0602209	0.319177	0.999608
ENSSSCG00000003113	C5AR2	complement component 5a receptor 2	1.06422	0.583896	0.541886	0.999608
ENSSSCG00000003114	DHX34	DExH-box helicase 34	539.062	-0.0599478	0.559166	0.999608
ENSSSCG00000003115	MEIS3	Meis homeobox 3	1078.51	0.0893205	0.460906	0.999608
ENSSSCG00000003119	ZNF541	zinc finger protein 541	10.0863	-0.32525	0.368144	0.999608
ENSSSCG00000003120	NAPA	NSF attachment protein alpha	4534.9	0.156771	0.0210165	0.999608
ENSSSCG00000003121	KPTN	kaptin, actin binding protein	1.99535	0.33487	0.664884	0.999608
ENSSSCG00000003123	BSPH1	binder of sperm protein homolog 1	0.20149	0.48927	0.875484	0.999608
ENSSSCG00000003124	CRX	cone-rod homeobox	0.0343207	0.346443	0.911734	0.999608
ENSSSCG00000003125	ELSPBP1	epididymal sperm binding protein 1	0.0439271	-0.217758	0.944452	0.999608
ENSSSCG00000003126	CABP5	calcium binding protein 5	1.13555	0.21019	0.809036	0.999608
ENSSSCG00000003128	LIG1	DNA ligase 1	344.37	0.069981	0.339824	0.999608
ENSSSCG00000003129	ZSWIM9	zinc finger SWIM-type containing 9	194.089	-0.143599	0.21044	0.999608
ENSSSCG00000003131	SYNGR4	synaptogyrin 4	7.23895	0.401858	0.273402	0.999608
ENSSSCG00000003133	GRIN2D	glutamate ionotropic receptor NMDA type subunit 2D	327.752	0.143107	0.303481	0.999608
ENSSSCG00000003134	GRWD1	glutamate rich WD repeat containing 1	621.642	0.0811363	0.235392	0.999608
ENSSSCG00000003135	KCNJ14	potassium inwardly rectifying channel subfamily J member 14	104.295	0.000924432	0.994797	0.999608
ENSSSCG00000003136	CYTH2	cytohesin 2	2622.9	0.0619923	0.349067	0.999608
ENSSSCG00000003137	PLEKHA4	pleckstrin homology domain containing A4	103.521	-0.364561	0.156135	0.999608
ENSSSCG00000003139	BCAT2	branched chain amino acid transaminase 2	510.153	-0.082039	0.389581	0.999608
ENSSSCG00000003140	FGF21	fibroblast growth factor 21	89.2919	0.152396	0.284032	0.999608
ENSSSCG00000003142	IZUMO1	izumo sperm-egg fusion 1	0.21939	-0.075876	0.980606	0.999608
ENSSSCG00000003143	MAMSTR	MEF2 activating motif and SAP domain containing transcriptional regulator	167.109	0.156783	0.118175	0.999608
ENSSSCG00000003144	DHDH	BCL2 associated X, apoptosis regulator	1554.74	0.155545	0.108622	0.999608
ENSSSCG00000003145	FUT2	fucosyltransferase 2	17.2522	-0.390507	0.153265	0.999608
ENSSSCG00000003146	NTN5	netrin 5	40.7606	-0.0179235	0.932891	0.999608
ENSSSCG00000003147	CA11	carbonic anhydrase 11	2808.8	0.0811309	0.377632	0.999608
ENSSSCG00000003148	DBP	D-box binding PAR bZIP transcription factor	778.224	0.148281	0.163784	0.999608
ENSSSCG00000003149	TULP2	TUB like protein 2	50.3513	-0.0571118	0.741056	0.999608
ENSSSCG00000003150	NUCB1	nucleobindin 1	12.1264	0.197875	0.5215	0.999608
ENSSSCG00000003152	RUVBL2	RuvB like AAA ATPase 2	1029.78	0.0622079	0.391605	0.999608
ENSSSCG00000003153	FTL	ferritin light chain	15119.9	-0.0554552	0.625369	0.999608
ENSSSCG00000003154	GYS1	glycogen synthase 1	517.671	0.0778988	0.262772	0.999608
ENSSSCG00000003155	PPP1R15A	protein phosphatase 1 regulatory subunit 15A	508.376	0.0763159	0.1753	0.999608
ENSSSCG00000003156	HRC	histidine rich calcium binding protein	26.5156	-0.287161	0.246221	0.999608
ENSSSCG00000003157	LIN7B	lin-7 homolog B, crumbs cell polarity complex component	1469.58	0.145023	0.243799	0.999608
ENSSSCG00000003159	KCNA7	potassium voltage-gated channel subfamily A member 7	11.6254	0.244524	0.471442	0.999608
ENSSSCG00000003160	NTF4	neurotrophin 4	35.1058	0.148277	0.63446	0.999608
ENSSSCG00000003161	PRRG2	proline rich and Gla domain 2	79.4436	0.0294554	0.834415	0.999608
ENSSSCG00000003165	RPS11	ribosomal protein S11	8119.6	0.0888466	0.45184	0.999608
ENSSSCG00000003168	ALDH16A1	aldehyde dehydrogenase 16 family member A1	57.7081	0.0703632	0.692651	0.999608
ENSSSCG00000003169	PIH1D1	PIH1 domain containing 1	503.578	0.0665754	0.511732	0.999608
ENSSSCG00000003171	PTH2	parathyroid hormone 2	46.3884	-0.198057	0.356481	0.999608
ENSSSCG00000003172	CCDC155	coiled-coil domain containing 155	4.93845	0.198489	0.654572	0.999608
ENSSSCG00000003177	BCL2L12	BCL2 like 12	28.5394	0.0628755	0.733995	0.999608
ENSSSCG00000003178	IRF3	interferon regulatory factor 3	558.642	-0.025353	0.753267	0.999608
ENSSSCG00000003183	RRAS	RAS related	178.883	-0.0475163	0.728642	0.999608
ENSSSCG00000003187	FCGRT	Fc fragment of IgG receptor and transporter	996.136	0.00266261	0.976441	0.999608
ENSSSCG00000003189	PRMT1	protein arginine methyltransferase 1	4309.28	0.0911721	0.237276	0.999608
ENSSSCG00000003191	TSKS	testis specific serine kinase substrate	13.6145	-0.183931	0.51842	0.999608
ENSSSCG00000003192	IL4I1	interleukin 4 induced 1	282.654	-0.0849182	0.380542	0.999608
ENSSSCG00000003193	TBC1D17	TBC1 domain family member 17	1213.7	0.0673462	0.337379	0.999608
ENSSSCG00000003194	AKT1S1	AKT1 substrate 1	842.504	0.0452576	0.457815	0.999608
ENSSSCG00000003195	PNKP	polynucleotide kinase 3'-phosphatase	776.69	-0.0917062	0.49855	0.999608
ENSSSCG00000003196	PTOV1	PTOV1 extended AT-hook containing adaptor protein	1482.9	0.135202	0.0431481	0.999608
ENSSSCG00000003197	MED25	mediator complex subunit 25	826.773	-0.0456791	0.465175	0.999608
ENSSSCG00000003198	FUZ	fuzzy planar cell polarity protein	277.467	-0.121275	0.181	0.999608
ENSSSCG00000003201	ATF5	activating transcription factor 5	396.165	-0.00743544	0.941717	0.999608
ENSSSCG00000003204	VRK3	VRK serine/threonine kinase 3	417.263	0.026095	0.726491	0.999608
ENSSSCG00000003207	IZUMO2	IZUMO family member 2	25.6478	0.116455	0.595448	0.999608
ENSSSCG00000003211	NR1H2	nuclear receptor subfamily 1 group H member 2	999.658	-0.0132148	0.83103	0.999608
ENSSSCG00000003212	NAPSA	napsin A aspartic peptidase	76.0348	-0.210739	0.311264	0.999608
ENSSSCG00000003214	KCNC3	potassium voltage-gated channel subfamily C member 3	383.656	0.253911	0.214742	0.999608
ENSSSCG00000003216	POLD1	DNA polymerase delta 1, catalytic subunit	191.071	0.0265544	0.785277	0.999608
ENSSSCG00000003217	ASPDH	aspartate dehydrogenase domain containing	1763.71	-0.0860395	0.492304	0.999608
ENSSSCG00000003218	MYBPC2	myosin binding protein C, fast type	129.654	0.0575775	0.807792	0.999608
ENSSSCG00000003219	FAM71E1	family with sequence similarity 71 member E1	75.8707	-0.0825451	0.558335	0.999608
ENSSSCG00000003222	SYT3	synaptotagmin 3	1211.1	0.0717767	0.366758	0.999608
ENSSSCG00000003228	VSIG10L	V-set and immunoglobulin domain containing 10 like	44.1637	-0.0703963	0.678057	0.999608
ENSSSCG00000003229	ETFB	electron transfer flavoprotein subunit beta	4.90004	-0.435522	0.386479	0.999608
ENSSSCG00000003231	NKG7	natural killer cell granule protein 7	36.8812	-0.0674568	0.782099	0.999608
ENSSSCG00000003232	LIM2	lens intrinsic membrane protein 2	9.92244	-0.345762	0.331123	0.999608
ENSSSCG00000003233	ZNF175	zinc finger protein 175	70.5807	-0.019422	0.88965	0.999608
ENSSSCG00000003238	SPACA6	sperm acrosome associated 6	23.9841	-0.320543	0.173789	0.999608
ENSSSCG00000003239	HAS1	hyaluronan synthase 1	64.5518	0.112837	0.495318	0.999608
ENSSSCG00000003241	ZNF614	zinc finger protein 614	10.7757	0.393815	0.248048	0.999608
ENSSSCG00000003251	NLRP12	NLR family pyrin domain containing 12	2.71131	-0.831238	0.176728	0.999608
ENSSSCG00000003253	MYADM	myeloid associated differentiation marker	1873.19	0.0616334	0.37925	0.999608
ENSSSCG00000003255	CACNG8	calcium voltage-gated channel auxiliary subunit gamma 8	3895.11	0.150503	0.138653	0.999608
ENSSSCG00000003256	PRKCG	protein kinase C gamma	6358.64	0.0368024	0.678709	0.999608
ENSSSCG00000003257	CACNG6	calcium voltage-gated channel auxiliary subunit gamma 6	261.708	0.114859	0.297098	0.999608
ENSSSCG00000003259	OSCAR	osteoclast associated Ig-like receptor	68.3921	-0.0710761	0.6465	0.999608
ENSSSCG00000003262	TFPT	TCF3 fusion partner	979.788	0.0955647	0.392503	0.999608
ENSSSCG00000003263	PRPF31	pre-mRNA processing factor 31	1895.84	0.0803988	0.173229	0.999608
ENSSSCG00000003264	CNOT3	CCR4-NOT transcription complex subunit 3	769.617	0.0470335	0.466896	0.999608
ENSSSCG00000003265	LENG1	leukocyte receptor cluster member 1	48.2646	0.115313	0.43135	0.999608
ENSSSCG00000003266	TMC4	transmembrane channel like 4	28.6001	0.0454724	0.827097	0.999608
ENSSSCG00000003267	MBOAT7	membrane bound O-acyltransferase domain containing 7	2275.86	0.100069	0.156974	0.999608
ENSSSCG00000003268	TSEN34	tRNA splicing endonuclease subunit 34	1027.31	0.100015	0.153718	0.999608
ENSSSCG00000003269	LENG9	leukocyte receptor cluster member 9	154.378	0.0388284	0.667577	0.999608
ENSSSCG00000003271	TTYH1	tweety family member 1	1644.75	-0.0999447	0.26278	0.999608
ENSSSCG00000003284	FCAR	Fc fragment of IgA receptor	0.343255	-1.90704	0.487671	0.999608
ENSSSCG00000003288	HSPBP1	HSPA (Hsp70) binding protein 1	1672.64	0.138099	0.10029	0.999608
ENSSSCG00000003289	ISOC2	isochorismatase domain containing 2	247.86	-0.0443844	0.635267	0.999608
ENSSSCG00000003301	PPP6R1	protein phosphatase 6 regulatory subunit 1	1462.9	0.05685	0.352025	0.999608
ENSSSCG00000003306	HELZ2	helicase with zinc finger 2	0.389668	-1.01593	0.703684	0.999608
ENSSSCG00000003315	NLRP8	NLR family pyrin domain containing 8	2.70218	-0.453248	0.568837	0.999608
ENSSSCG00000003317	ZNF787	zinc finger protein 787	369.134	0.0123002	0.852295	0.999608
ENSSSCG00000003318	GALP	galanin like peptide	293.757	-0.0368965	0.840277	0.999608
ENSSSCG00000003324	ZNF471	zinc finger protein 471	37.6939	-0.203969	0.408045	0.999608
ENSSSCG00000003326	PEG3	paternally expressed 3	903.856	0.125471	0.671549	0.999608
ENSSSCG00000003329	ACAP3	ArfGAP with coiled-coil, ankyrin repeat and PH domains 3	2939.73	-0.0291976	0.725895	0.999608
ENSSSCG00000003331	TNFRSF4	TNF receptor superfamily member 4	0.225597	0.270025	0.931087	0.999608
ENSSSCG00000003332	SDF4	stromal cell derived factor 4	1852.09	0.0465799	0.454548	0.999608
ENSSSCG00000003333	C1QTNF12	C1q and TNF related 12	21.1331	-0.151639	0.518838	0.999608
ENSSSCG00000003334	UBE2J2	ubiquitin conjugating enzyme E2 J2	808.412	0.0369417	0.648652	0.999608
ENSSSCG00000003336	TTLL10	tubulin tyrosine ligase like 10	0.870711	1.10697	0.30774	0.999608
ENSSSCG00000003338	PUSL1	pseudouridine synthase like 1	170.518	-0.0131345	0.939985	0.999608
ENSSSCG00000003339	INTS11	integrator complex subunit 11	201.781	0.0872902	0.618615	0.999608
ENSSSCG00000003341	TAS1R3	taste 1 receptor member 3	527.379	0.0683496	0.26347	0.999608
ENSSSCG00000003342	DVL1	dishevelled segment polarity protein 1	3785.77	0.0176217	0.86905	0.999608
ENSSSCG00000003343	ATAD3A	ATPase family AAA domain-containing protein 3	883.972	0.0733155	0.351341	0.999608
ENSSSCG00000003344	VWA1	von Willebrand factor A domain containing 1	1279.24	-0.0470268	0.572959	0.999608
ENSSSCG00000003350	MIB2	mindbomb E3 ubiquitin protein ligase 2	2072.77	0.01033	0.88423	0.999608
ENSSSCG00000003351	MMP23B	matrix metallopeptidase 23B	78.7109	-0.161316	0.32995	0.999608
ENSSSCG00000003353	SLC35E2B	solute carrier family 35 member E2B	1744.12	0.0244508	0.750276	0.999608
ENSSSCG00000003354	CCNL2	cyclin L2	3412.02	-0.00326377	0.967369	0.999608
ENSSSCG00000003356	MMEL1	membrane metalloendopeptidase like 1	142.683	0.131182	0.253349	0.999608
ENSSSCG00000003357	ACTRT2	actin related protein T2	0.720999	-0.452695	0.706588	0.999608
ENSSSCG00000003359	TPRG1L	tumor protein p63 regulated 1 like	2958.55	0.130402	0.0997414	0.999608
ENSSSCG00000003360	WRAP73	WD repeat containing, antisense to TP73	578.549	-0.02673	0.69214	0.999608
ENSSSCG00000003362	CEP104	centrosomal protein 104	587.87	-0.0579052	0.579342	0.999608
ENSSSCG00000003366	CHD5	chromodomain helicase DNA binding protein 5	3580.29	0.0726155	0.421049	0.999608
ENSSSCG00000003368	RNF207	ring finger protein 207	3.1266	0.0111787	0.984116	0.999608
ENSSSCG00000003369	RPL22	isoprenylcysteine carboxyl methyltransferase	3921.38	0.14607	0.201495	0.999608
ENSSSCG00000003370	HES3	hes family bHLH transcription factor 3	13.5089	0.242493	0.40403	0.999608
ENSSSCG00000003371	GPR153	G protein-coupled receptor 153	53.4594	0.436002	0.098803	0.999608
ENSSSCG00000003374	ESPN	espin	14.8734	0.00674857	0.980162	0.999608
ENSSSCG00000003377	ACOT7	acyl-CoA thioesterase 7	4797.43	0.162922	0.0749156	0.999608
ENSSSCG00000003379	KLHL21	kelch like family member 21	464.364	0.00188417	0.990288	0.999608
ENSSSCG00000003382	TAS1R1	taste 1 receptor member 1	105.897	-0.0923402	0.506546	0.999608
ENSSSCG00000003383	ZBTB48	zinc finger and BTB domain containing 48	311.862	-0.0626337	0.448484	0.999608
ENSSSCG00000003384	DNAJC11	DnaJ heat shock protein family (Hsp40) member C11	1007.96	0.0877772	0.173235	0.999608
ENSSSCG00000003385	PARK7	Parkinsonism associated deglycase	5772.35	0.137252	0.178549	0.999608
ENSSSCG00000003386	TNFRSF9	TNF receptor superfamily member 9	4.88634	-0.0678367	0.909543	0.999608
ENSSSCG00000003388	SLC45A1	solute carrier family 45 member 1	1483.71	0.184783	0.0241977	0.999608
ENSSSCG00000003390	SLC2A7	solute carrier family 2 member 7	3.60185	0.925835	0.313043	0.999608
ENSSSCG00000003391	CA6	carbonic anhydrase 6	4.57195	-0.412372	0.387822	0.999608
ENSSSCG00000003393	TMEM201	transmembrane protein 201	630.477	0.0457609	0.481487	0.999608
ENSSSCG00000003395	PIK3CD	phosphatidylinositol-4,5-bisphosphate 3-kinase catalytic subunit delta	178.582	-0.029496	0.812155	0.999608
ENSSSCG00000003396	CLSTN1	calsyntenin 1	21273.3	0.0794534	0.127972	0.999608
ENSSSCG00000003398	UBE4B	ubiquitination factor E4B	1113.49	0.0058922	0.935895	0.999608
ENSSSCG00000003399	RBP7	retinol binding protein 7	14.75	-0.272473	0.429359	0.999608
ENSSSCG00000003400	NMNAT1	nicotinamide nucleotide adenylyltransferase 1	158.745	-0.055153	0.50207	0.999608
ENSSSCG00000003401	KIF1B	kinesin family member 1B	5827.71	-0.0240796	0.748157	0.999608
ENSSSCG00000003402	PGD	phosphogluconate dehydrogenase	1794.63	0.0166519	0.767809	0.999608
ENSSSCG00000003403	CENPS	apoptosis-inducing, TAF9-like domain 1	78.3013	0.0753978	0.582479	0.999608
ENSSSCG00000003404	DFFA	DNA fragmentation factor subunit alpha	627.3	0.111551	0.0655972	0.999608
ENSSSCG00000003405	PEX14	peroxisomal biogenesis factor 14	1002.83	0.145491	0.0274931	0.999608
ENSSSCG00000003407	CASZ1	castor zinc finger 1	5.84071	0.31578	0.405295	0.999608
ENSSSCG00000003410	MASP2	mannan binding lectin serine peptidase 2	145.679	-0.136887	0.287067	0.999608
ENSSSCG00000003412	EXOSC10	exosome component 10	628.678	0.100928	0.121557	0.999608
ENSSSCG00000003413	MTOR	mechanistic target of rapamycin kinase	1516.21	0.0967166	0.161644	0.999608
ENSSSCG00000003414	ANGPTL7	angiopoietin like 7	7.52036	0.0265631	0.9441	0.999608
ENSSSCG00000003417	DISP3	dispatched RND transporter family member 3	727.388	-0.0660438	0.380251	0.999608
ENSSSCG00000003419	MAD2L2	mitotic arrest deficient 2 like 2	541.55	0.0396946	0.689557	0.999608
ENSSSCG00000003423	DRAXIN	dorsal inhibitory axon guidance protein	1387.09	0.0659611	0.649926	0.999608
ENSSSCG00000003428	MTHFR	methylenetetrahydrofolate reductase	450.11	0.042861	0.62751	0.999608
ENSSSCG00000003429	CLCN6	chloride voltage-gated channel 6	1134.38	0.0234915	0.760301	0.999608
ENSSSCG00000003431	NPPB	natriuretic peptide B	6.02884	-0.143263	0.703509	0.999608
ENSSSCG00000003432	KIAA2013	KIAA2013 ortholog	1350.07	0.0743837	0.105941	0.999608
ENSSSCG00000003433	PLOD1	procollagen-lysine,2-oxoglutarate 5-dioxygenase 1	1174.15	0.0381912	0.515519	0.999608
ENSSSCG00000003434	MFN2	mitofusin 2	2351.02	0.0401834	0.651753	0.999608
ENSSSCG00000003435	MIIP	migration and invasion inhibitory protein	297.265	-0.0134618	0.915661	0.999608
ENSSSCG00000003438	VPS13D	vacuolar protein sorting 13 homolog D	718.786	0.0219909	0.853946	0.999608
ENSSSCG00000003439	DHRS3	dehydrogenase/reductase 3	498.856	-0.0520203	0.595397	0.999608
ENSSSCG00000003440	AADACL4	arylacetamide deacetylase like 4	0.553291	-2.08972	0.209671	0.999608
ENSSSCG00000003442	C1orf158	chromosome 6 C1orf158 homolog	0.626511	0.470309	0.828496	0.999608
ENSSSCG00000003449	LRRC38	leucine rich repeat containing 38	15.7594	-0.54929	0.0368167	0.999608
ENSSSCG00000003455	FHAD1	forkhead associated phosphopeptide binding domain 1	147.986	-0.310169	0.165225	0.999608
ENSSSCG00000003458	CTRC	EF-hand domain family member D2	810.484	0.0133129	0.91862	0.999608
ENSSSCG00000003460	CASP9	caspase 9	352.668	0.0667761	0.541445	0.999608
ENSSSCG00000003461	RSC1A1	regulator of solute carriers 1	610.891	-0.0839627	0.17049	0.999608
ENSSSCG00000003463	AGMAT	agmatinase	0.628464	-2.02957	0.124622	0.999608
ENSSSCG00000003464	DNAJC16	DnaJ heat shock protein family (Hsp40) member C16	636.441	0.0499413	0.564606	0.999608
ENSSSCG00000003465	FBLIM1	filamin binding LIM protein 1	209.861	0.0902989	0.438515	0.999608
ENSSSCG00000003466	TMEM82	transmembrane protein 82	10.9372	0.0234045	0.949728	0.999608
ENSSSCG00000003468	PLEKHM2	pleckstrin homology and RUN domain containing M2	3031.09	0.0641899	0.262055	0.999608
ENSSSCG00000003470	FAM131C	family with sequence similarity 131 member C	2077.99	0.172764	0.0452527	0.999608
ENSSSCG00000003471	EPHA2	EPH receptor A2	48.8781	0.0559736	0.710505	0.999608
ENSSSCG00000003472	ARHGEF19	Rho guanine nucleotide exchange factor 19	119.147	-0.0920188	0.592349	0.999608
ENSSSCG00000003473	CPLANE2	ciliogenesis and planar polarity effector 2	152.803	0.0148247	0.898869	0.999608
ENSSSCG00000003476	SPATA21	spermatogenesis associated 21	1.43172	0.584409	0.513428	0.999608
ENSSSCG00000003477	NECAP2	NECAP endocytosis associated 2	920.519	-0.0526887	0.537461	0.999608
ENSSSCG00000003478	CROCC	ciliary rootlet coiled-coil, rootletin	775.31	-0.174939	0.407425	0.999608
ENSSSCG00000003479	MFAP2	microfibril associated protein 2	48.545	-0.435843	0.0801942	0.999608
ENSSSCG00000003481	PADI1	peptidyl arginine deiminase 1	933.252	0.0945962	0.660338	0.999608
ENSSSCG00000003482	PADI3	peptidyl arginine deiminase 3	0.311489	-1.025	0.616392	0.999608
ENSSSCG00000003483	PADI4	peptidyl arginine deiminase 4	0.437541	-1.24091	0.509881	0.999608
ENSSSCG00000003484	PADI6	peptidyl arginine deiminase 6	3.22133	0.142999	0.811183	0.999608
ENSSSCG00000003485	RCC2	regulator of chromosome condensation 2	1752.3	-0.00918017	0.882296	0.999608
ENSSSCG00000003486	ARHGEF10L	Rho guanine nucleotide exchange factor 10 like	1747.23	-0.064321	0.546935	0.999608
ENSSSCG00000003488	UBR4	ubiquitin protein ligase E3 component n-recognin 4	2447.13	0.00560994	0.910283	0.999608
ENSSSCG00000003489	EMC1	ER membrane protein complex subunit 1	1231.14	0.00814819	0.898147	0.999608
ENSSSCG00000003491	AKR7A2	aldo-keto reductase family 7 member A2	114.602	0.033937	0.850971	0.999608
ENSSSCG00000003492	SLC66A1	solute carrier family 66 member 1	225.131	-0.0806743	0.376388	0.999608
ENSSSCG00000003498	UBXN10	UBX domain protein 10	101.224	-0.409927	0.140914	0.999608
ENSSSCG00000003505	DDOST	dolichyl-diphosphooligosaccharide--protein glycosyltransferase non-catalytic subunit	1433.83	-0.0124269	0.866425	0.999608
ENSSSCG00000003506	PINK1	PTEN induced kinase 1	3993.33	0.0265011	0.686123	0.999608
ENSSSCG00000003509	SH2D5	SH2 domain containing 5	219.116	0.16528	0.147134	0.999608
ENSSSCG00000003511	HP1BP3	heterochromatin protein 1 binding protein 3	2236.01	0.00808233	0.811437	0.999608
ENSSSCG00000003512	EIF4G3	eukaryotic translation initiation factor 4 gamma 3	3885.85	0.0143435	0.761584	0.999608
ENSSSCG00000003513	ECE1	endothelin converting enzyme 1	638.948	0.0246236	0.755416	0.999608
ENSSSCG00000003514	HSPG2	heparan sulfate proteoglycan 2	607.788	-0.154931	0.238908	0.999608
ENSSSCG00000003523	EPHA8	EPH receptor A8	120.646	-0.0908931	0.505008	0.999608
ENSSSCG00000003524	C1QA	complement C1q A chain	834.778	0.0529957	0.765988	0.999608
ENSSSCG00000003527	EPHB2	EPH receptor B2	412.529	0.0809893	0.477927	0.999608
ENSSSCG00000003529	LACTBL1	lactamase beta like 1	0.047385	-0.108881	0.972208	0.999608
ENSSSCG00000003530	TEX46	testis expressed 46	1.83075	0.686818	0.406144	0.999608
ENSSSCG00000003531	KDM1A	lysine demethylase 1A	1005.44	0.019171	0.753707	0.999608
ENSSSCG00000003532	LUZP1	leucine zipper protein 1	775.672	0.00882028	0.903538	0.999608
ENSSSCG00000003539	GRHL3	grainyhead like transcription factor 3	6.98806	-0.874085	0.0425649	0.999608
ENSSSCG00000003541	STPG1	sperm tail PG-rich repeat containing 1	99.7082	0.0410448	0.763962	0.999608
ENSSSCG00000003543	NIPAL3	NIPA like domain containing 3	1677.56	0.00817362	0.940386	0.999608
ENSSSCG00000003547	NCMAP	non-compact myelin associated protein	31.3243	-0.337254	0.0652835	0.999608
ENSSSCG00000003549	LDLRAP1	low density lipoprotein receptor adaptor protein 1	68.914	0.0597922	0.807373	0.999608
ENSSSCG00000003551	PAQR7	progestin and adipoQ receptor family member 7	1167.16	0.0740247	0.266085	0.999608
ENSSSCG00000003552	AUNIP	aurora kinase A and ninein interacting protein	2.05517	0.0154862	0.981643	0.999608
ENSSSCG00000003553	MTFR1L	mitochondrial fission regulator 1 like	778.084	0.082112	0.0884064	0.999608
ENSSSCG00000003555	HMGN2	high mobility group nucleosomal binding domain 2	2.57603	0.956197	0.221864	0.999608
ENSSSCG00000003558	RPS6KA1	ribosomal protein S6 kinase A1	215.555	-0.0230542	0.8569	0.999608
ENSSSCG00000003559	ARID1A	AT-rich interaction domain 1A	856.914	-0.0931741	0.49964	0.999608
ENSSSCG00000003561	ZDHHC18	zinc finger DHHC-type containing 18	547.914	0.118903	0.0800503	0.999608
ENSSSCG00000003564	GPATCH3	G-patch domain containing 3	306.885	0.0679914	0.325567	0.999608
ENSSSCG00000003565	NR0B2	nuclear receptor subfamily 0 group B member 2	0.713802	-1.0238	0.448076	0.999608
ENSSSCG00000003566	NUDC	nuclear distribution C, dynein complex regulator	3124.14	0.090517	0.300661	0.999608
ENSSSCG00000003567	KDF1	keratinocyte differentiation factor 1	13.9326	-0.305337	0.484407	0.999608
ENSSSCG00000003569	SLC9A1	solute carrier family 9 member A1	631.309	0.0787764	0.303212	0.999608
ENSSSCG00000003570	WDTC1	WD and tetratricopeptide repeats 1	1061.43	0.0542641	0.417873	0.999608
ENSSSCG00000003572	SYTL1	synaptotagmin like 1	90.1613	-0.13315	0.435833	0.999608
ENSSSCG00000003573	MAP3K6	mitogen-activated protein kinase kinase kinase 6	52.442	-0.335838	0.116904	0.999608
ENSSSCG00000003575	CD164L2	CD164 molecule like 2	12.126	-0.371152	0.230507	0.999608
ENSSSCG00000003576	GPR3	G protein-coupled receptor 3	78.3936	0.157576	0.238017	0.999608
ENSSSCG00000003577	WASF2	WASP family member 2	511.392	-0.154826	0.334148	0.999608
ENSSSCG00000003578	FGR	FGR proto-oncogene, Src family tyrosine kinase	115.284	-0.033073	0.845083	0.999608
ENSSSCG00000003580	EYA3	EYA transcriptional coactivator and phosphatase 3	457.4	-0.0300079	0.619965	0.999608
ENSSSCG00000003582	SMPDL3B	sphingomyelin phosphodiesterase acid like 3B	11.6524	-0.0367968	0.92277	0.999608
ENSSSCG00000003583	RPA2	replication protein A2	496.081	0.0558252	0.479	0.999608
ENSSSCG00000003584	THEMIS2	thymocyte selection associated family member 2	24.1582	-0.250951	0.26512	0.999608
ENSSSCG00000003585	GJB5	gap junction protein beta 5	15.0517	-0.457256	0.146303	0.999608
ENSSSCG00000003586	EPB41	erythrocyte membrane protein band 4.1	195.547	-0.175164	0.0522657	0.999608
ENSSSCG00000003589	SRSF4	serine and arginine rich splicing factor 4	2798.93	0.00471077	0.932447	0.999608
ENSSSCG00000003590	PTPRU	protein tyrosine phosphatase receptor type U	894.812	0.0895793	0.377833	0.999608
ENSSSCG00000003591	PUM1	pumilio RNA binding family member 1	804.585	-0.0620874	0.613392	0.999608
ENSSSCG00000003592	SDC3	syndecan 3	8330.62	0.115113	0.199369	0.999608
ENSSSCG00000003596	SNRNP40	small nuclear ribonucleoprotein U5 subunit 40	490.158	-0.0225689	0.777322	0.999608
ENSSSCG00000003600	TINAGL1	tubulointerstitial nephritis antigen like 1	34.4992	0.0134722	0.966219	0.999608
ENSSSCG00000003601	HCRTR1	hypocretin receptor 1	126.051	0.131342	0.526873	0.999608
ENSSSCG00000003603	COL16A1	collagen type XVI alpha 1 chain	587.401	-0.167264	0.323613	0.999608
ENSSSCG00000003604	ADGRB2	adhesion G protein-coupled receptor B2	5572.81	0.0782871	0.208457	0.999608
ENSSSCG00000003606	SPOCD1	SPOC domain containing 1	1.22951	0.747965	0.494368	0.999608
ENSSSCG00000003608	LCK	LCK proto-oncogene, Src family tyrosine kinase	1.27252	1.18578	0.293179	0.999608
ENSSSCG00000003610	IQCC	IQ motif containing C	230.18	0.149127	0.0703685	0.999608
ENSSSCG00000003612	EIF3I	eukaryotic translation initiation factor 3 subunit I	660.773	0.120355	0.143116	0.999608
ENSSSCG00000003613	HDAC1	histone deacetylase 1	385.403	-0.0713977	0.37673	0.999608
ENSSSCG00000003616	FAM167B	family with sequence similarity 167 member B	2.6998	0.0875928	0.89735	0.999608
ENSSSCG00000003617	TXLNA	taxilin alpha	1312.79	0.0143684	0.804873	0.999608
ENSSSCG00000003619	AZIN2	antizyme inhibitor 2	88.6316	0.110987	0.297065	0.999608
ENSSSCG00000003620	TRIM62	tripartite motif containing 62	244.988	0.0804599	0.42684	0.999608
ENSSSCG00000003621	ZSCAN20	zinc finger and SCAN domain containing 20	39.9225	-0.17009	0.409565	0.999608
ENSSSCG00000003623	C1orf94	chromosome 6 C1orf94 homolog	8.13428	0.308058	0.357632	0.999608
ENSSSCG00000003627	ZMYM4	zinc finger MYM-type containing 4	577.946	-0.12013	0.0668557	0.999608
ENSSSCG00000003628	CLSPN	claspin	84.3921	-0.040613	0.742143	0.999608
ENSSSCG00000003630	AGO1	argonaute RISC component 1	979.733	0.0400118	0.494031	0.999608
ENSSSCG00000003633	TEKT2	tektin 2	34.0368	-0.0364412	0.888059	0.999608
ENSSSCG00000003634	ADPRHL2	ADP-ribosylhydrolase like 2	761.805	0.135281	0.0518887	0.999608
ENSSSCG00000003637	MAP7D1	MAP7 domain containing 1	5723.86	0.0825818	0.0200834	0.999608
ENSSSCG00000003640	GRIK3	glutamate ionotropic receptor kainate type subunit 3	804.701	-0.0599167	0.684191	0.999608
ENSSSCG00000003642	INPP5B	inositol polyphosphate-5-phosphatase B	295.211	-0.0558802	0.495538	0.999608
ENSSSCG00000003643	SF3A3	splicing factor 3a subunit 3	878.98	0.0478265	0.430772	0.999608
ENSSSCG00000003644	FHL3	four and a half LIM domains 3	123.891	-0.16677	0.132868	0.999608
ENSSSCG00000003645	UTP11	UTP11 small subunit processome component	841.836	0.0172907	0.798769	0.999608
ENSSSCG00000003646	POU3F1	POU class 3 homeobox 1	408.129	-0.159755	0.328027	0.999608
ENSSSCG00000003648	RRAGC	Ras related GTP binding C	988.499	0.000153395	0.997485	0.999608
ENSSSCG00000003650	GJA9	gap junction protein alpha 9	54.7123	0.364619	0.269147	0.999608
ENSSSCG00000003651	RHBDL2	rhomboid like 2	57.952	-0.366947	0.0680575	0.999608
ENSSSCG00000003652	AKIRIN1	akirin 1	1387.44	-0.0425149	0.560274	0.999608
ENSSSCG00000003653	NDUFS5	NADH:ubiquinone oxidoreductase subunit S5	2887.76	0.126864	0.266802	0.999608
ENSSSCG00000003654	MACF1	microtubule actin crosslinking factor 1	4010.78	-0.0948384	0.297551	0.999608
ENSSSCG00000003660	PABPC4	poly(A) binding protein cytoplasmic 4	873.383	-0.00250348	0.965945	0.999608
ENSSSCG00000003662	NT5C1A	5'-nucleotidase, cytosolic IA	241.488	-0.0450135	0.653886	0.999608
ENSSSCG00000003663	HPCAL1	hippocalcin like 1	60.6048	0.348744	0.144112	0.999608
ENSSSCG00000003667	TRIT1	tRNA isopentenyltransferase 1	674.235	-0.0477962	0.542653	0.999608
ENSSSCG00000003669	MFSD2A	major facilitator superfamily domain containing 2A	467.895	0.166972	0.081475	0.999608
ENSSSCG00000003670	RLF	rearranged L-myc fusion	370.722	-0.0875216	0.316706	0.999608
ENSSSCG00000003672	CAP1	cyclase associated actin cytoskeleton regulatory protein 1	4823.48	0.0405028	0.441977	0.999608
ENSSSCG00000003673	CEP192	centrosomal protein 192	927.185	0.00686156	0.901786	0.999608
ENSSSCG00000003679	PPP4R1	protein phosphatase 4 regulatory subunit 1	561.436	-0.029598	0.585887	0.999608
ENSSSCG00000003680	RALBP1	ralA binding protein 1	756.819	0.0682507	0.217436	0.999608
ENSSSCG00000003682	ANKRD12	ankyrin repeat domain 12	856.685	-0.0707347	0.256453	0.999608
ENSSSCG00000003684	MTCL1	microtubule crosslinking factor 1	299.591	0.0365148	0.753673	0.999608
ENSSSCG00000003687	EPB41L3	erythrocyte membrane protein band 4.1 like 3	3226.92	0.0480084	0.460037	0.999608
ENSSSCG00000003690	DLGAP1	DLG associated protein 1	3775.66	0.0468528	0.53485	0.999608
ENSSSCG00000003691	MYL12A	myosin regulatory light chain 12B	6042.23	0.0387828	0.503187	0.999608
ENSSSCG00000003693	MYOM1	myomesin 1	21.9495	0.350956	0.24709	0.999608
ENSSSCG00000003694	EMILIN2	elastin microfibril interfacer 2	39.1556	-0.208144	0.29267	0.999608
ENSSSCG00000003697	NDC80	NDC80 kinetochore complex component	48.5436	0.00261281	0.989704	0.999608
ENSSSCG00000003699	GREB1L	GREB1 like retinoic acid receptor coactivator	49.6013	0.184703	0.35422	0.999608
ENSSSCG00000003700	ESCO1	establishment of sister chromatid cohesion N-acetyltransferase 1	321.137	-0.101236	0.316459	0.999608
ENSSSCG00000003701	SNRPD1	small nuclear ribonucleoprotein D1 polypeptide	781.04	-0.0138421	0.884588	0.999608
ENSSSCG00000003702	GATA6	GATA binding protein 6	1.97095	0.809953	0.237998	0.999608
ENSSSCG00000003705	CABLES1	Cdk5 and Abl enzyme substrate 1	287.844	-0.086725	0.417467	0.999608
ENSSSCG00000003707	NPC1	NPC intracellular cholesterol transporter 1	867.624	-0.139171	0.456747	0.999608
ENSSSCG00000003708	ANKRD29	ankyrin repeat domain 29	783.795	0.15572	0.044465	0.999608
ENSSSCG00000003709	LAMA3	laminin subunit alpha 3	193.458	-0.0222691	0.902959	0.999608
ENSSSCG00000003710	TTC39C	tetratricopeptide repeat domain 39C	13.18	0.469692	0.172102	0.999608
ENSSSCG00000003711	CABYR	calcium binding tyrosine phosphorylation regulated	99.6051	0.0583665	0.755324	0.999608
ENSSSCG00000003712	OSBPL1A	oxysterol binding protein like 1A	2471.66	-0.0543126	0.633814	0.999608
ENSSSCG00000003713	HRH4	histamine receptor H4	304.527	-0.0959031	0.267594	0.999608
ENSSSCG00000003715	ZNF521	zinc finger protein 521	105.346	0.010581	0.939007	0.999608
ENSSSCG00000003716	SS18	SS18 subunit of BAF chromatin remodeling complex	622.686	-0.122072	0.0782789	0.999608
ENSSSCG00000003717	PSMA8	proteasome 20S subunit alpha 8	0.421224	-0.422213	0.872929	0.999608
ENSSSCG00000003718	TAF4B	TATA-box binding protein associated factor 4b	47.3137	0.103364	0.528838	0.999608
ENSSSCG00000003721	CHST9	carbohydrate sulfotransferase 9	136.146	0.189691	0.292546	0.999608
ENSSSCG00000003722	CDH2	cadherin 2	1783.75	0.0278571	0.658543	0.999608
ENSSSCG00000003726	DSC1	desmocollin 1	1.34812	-0.738721	0.416698	0.999608
ENSSSCG00000003728	TRAPPC8	trafficking protein particle complex 8	654.763	-0.0372692	0.602678	0.999608
ENSSSCG00000003729	RNF125	ring finger protein 125	121.518	-0.0843404	0.53232	0.999608
ENSSSCG00000003730	RNF138	ring finger protein 138	367.436	-0.0762457	0.29358	0.999608
ENSSSCG00000003731	GAREM1	GRB2 associated regulator of MAPK1 subtype 1	686.454	-0.0479152	0.608726	0.999608
ENSSSCG00000003732	MEP1B	meprin A subunit beta	9.63797	0.115676	0.75573	0.999608
ENSSSCG00000003733	KLHL14	kelch like family member 14	518.531	-0.157468	0.329712	0.999608
ENSSSCG00000003736	ASXL3	ASXL transcriptional regulator 3	78.6368	-0.0770529	0.694295	0.999608
ENSSSCG00000003737	NOL4	nucleolar protein 4	427.965	-0.0375424	0.823118	0.999608
ENSSSCG00000003738	MAPRE2	microtubule associated protein RP/EB family member 2	6716.59	-0.0421681	0.606216	0.999608
ENSSSCG00000003740	ZSCAN30	zinc finger and SCAN domain containing 30	24.723	-0.116434	0.676958	0.999608
ENSSSCG00000003743	GALNT1	polypeptide N-acetylgalactosaminyltransferase 1	1404.74	-0.00485985	0.878904	0.999608
ENSSSCG00000003744	MOCOS	molybdenum cofactor sulfurase	3.31537	-0.299972	0.655221	0.999608
ENSSSCG00000003747	KIAA1328	KIAA1328 ortholog	110.805	0.0245331	0.782964	0.999608
ENSSSCG00000003748	CELF4	CUGBP Elav-like family member 4	1992.14	0.136217	0.222617	0.999608
ENSSSCG00000003749	PIK3C3	phosphatidylinositol 3-kinase catalytic subunit type 3	547.468	-0.0231419	0.649474	0.999608
ENSSSCG00000003755	MCOLN2	mucolipin 2	6.97122	-0.325433	0.452736	0.999608
ENSSSCG00000003756	LPAR3	lysophosphatidic acid receptor 3	21.7835	-0.0141505	0.964298	0.999608
ENSSSCG00000003757	SSX2IP	SSX family member 2 interacting protein	1041.77	-0.0112075	0.90137	0.999608
ENSSSCG00000003758	CTBS	chitobiase	9.78891	-0.615146	0.0288328	0.999608
ENSSSCG00000003760	TTLL7	tubulin tyrosine ligase like 7	1180.33	-0.162691	0.18823	0.999608
ENSSSCG00000003761	ADGRL2	adhesion G protein-coupled receptor L2	891.021	-0.119075	0.465283	0.999608
ENSSSCG00000003762	ADGRL4	adhesion G protein-coupled receptor L4	223.268	-0.0629524	0.659672	0.999608
ENSSSCG00000003763	IFI44	interferon induced protein 44	307.587	-1.21903	0.0408126	0.999608
ENSSSCG00000003766	DNAJB4	DnaJ heat shock protein family (Hsp40) member B4	892.959	-0.00718374	0.905815	0.999608
ENSSSCG00000003768	NEXN	nexilin F-actin binding protein	37.1369	-0.0252701	0.880909	0.999608
ENSSSCG00000003770	MIGA1	mitoguardin 1	327.949	-0.030773	0.79132	0.999608
ENSSSCG00000003771	FUBP1	far upstream element binding protein 1	1835.54	-0.0503154	0.23248	0.999608
ENSSSCG00000003773	AK5	adenylate kinase 5	5729.36	0.168356	0.14309	0.999608
ENSSSCG00000003775	MSH4	mutS homolog 4	623.475	-0.0388035	0.593949	0.999608
ENSSSCG00000003776	ACADM	acyl-CoA dehydrogenase medium chain	456.093	-0.0300579	0.741567	0.999608
ENSSSCG00000003777	SLC44A5	solute carrier family 44 member 5	961.19	0.00363168	0.964658	0.999608
ENSSSCG00000003778	LHX8	LIM homeobox 8	0.0426914	-0.108881	0.972208	0.999608
ENSSSCG00000003779	TYW3	tRNA-yW synthesizing protein 3 homolog	165.582	-0.115591	0.421628	0.999608
ENSSSCG00000003780	CRYZ	crystallin zeta	293.488	-0.160844	0.0686304	0.999608
ENSSSCG00000003783	FPGT	fucose-1-phosphate guanylyltransferase	35.4825	-0.1826	0.383968	0.999608
ENSSSCG00000003784	LRRIQ3	leucine rich repeats and IQ motif containing 3	22.2807	-0.298292	0.230823	0.999608
ENSSSCG00000003787	ZRANB2	zinc finger RANBP2-type containing 2	2192.14	-0.0444298	0.338189	0.999608
ENSSSCG00000003788	PTGER3	prostaglandin E receptor 3	85.4254	0.183864	0.375379	0.999608
ENSSSCG00000003789	CTH	cystathionine gamma-lyase	94.4625	0.0584037	0.655943	0.999608
ENSSSCG00000003790	ANKRD13C	ankyrin repeat domain 13C	644.362	-0.0704898	0.23194	0.999608
ENSSSCG00000003791	SRSF11	serine and arginine rich splicing factor 11	2006.29	-0.0374372	0.667423	0.999608
ENSSSCG00000003793	LRRC7	leucine rich repeat containing 7	1034.53	-0.0393568	0.598561	0.999608
ENSSSCG00000003794	RPE65	retinoid isomerohydrolase RPE65	170.239	-0.064799	0.634301	0.999608
ENSSSCG00000003795	WLS	Wnt ligand secretion mediator	1159.67	-0.163353	0.0724345	0.999608
ENSSSCG00000003797	DIRAS3	DIRAS family GTPase 3	9666.87	0.138649	0.221815	0.999608
ENSSSCG00000003798	SERBP1	SERPINE1 mRNA binding protein 1	5118.89	0.00512337	0.915145	0.999608
ENSSSCG00000003799	IL12RB2	interleukin 12 receptor subunit beta 2	21.9397	0.325084	0.0880652	0.999608
ENSSSCG00000003805	PDE4B	phosphodiesterase 4B	754.877	-0.0020517	0.980814	0.999608
ENSSSCG00000003806	LEPROT	leptin receptor overlapping transcript	966.387	-0.0316287	0.6766	0.999608
ENSSSCG00000003807	DNAJC6	DnaJ heat shock protein family (Hsp40) member C6	6482.03	0.0946393	0.200423	0.999608
ENSSSCG00000003809	JAK1	Janus kinase 1	2088.67	0.0269611	0.779627	0.999608
ENSSSCG00000003810	UBE2U	ubiquitin conjugating enzyme E2 U	6.11524	-0.107927	0.816378	0.999608
ENSSSCG00000003811	ROR1	receptor tyrosine kinase like orphan receptor 1	29.3999	-0.469792	0.0610805	0.999608
ENSSSCG00000003812	PGM1	phosphoglucomutase 1	60.093	0.166605	0.501522	0.999608
ENSSSCG00000003814	EFCAB7	EF-hand calcium binding domain 7	205.012	-0.0258449	0.769984	0.999608
ENSSSCG00000003815	ALG6	ALG6 alpha-1,3-glucosyltransferase	72.6425	-0.0422046	0.779905	0.999608
ENSSSCG00000003816	ATG4C	autophagy related 4C cysteine peptidase	166.359	-0.188038	0.166364	0.999608
ENSSSCG00000003818	DOCK7	dedicator of cytokinesis 7	509.792	0.029196	0.807062	0.999608
ENSSSCG00000003819	ANGPTL3	angiopoietin like 3	0.87075	-0.534403	0.72057	0.999608
ENSSSCG00000003820	USP1	ubiquitin specific peptidase 1	589.583	-0.103853	0.11073	0.999608
ENSSSCG00000003821	KANK4	KN motif and ankyrin repeat domains 4	110.959	-0.114402	0.517134	0.999608
ENSSSCG00000003823	C1orf87	chromosome 6 C1orf87 homolog	0.516312	0.377663	0.809529	0.999608
ENSSSCG00000003825	CYP2J34	cytochrome P450 2J2	215.909	-0.0224901	0.890299	0.999608
ENSSSCG00000003828	FGGY	FGGY carbohydrate kinase domain containing	94.8915	-0.0727171	0.603937	0.999608
ENSSSCG00000003830	MYSM1	Myb like, SWIRM and MPN domains 1	504.522	-0.025311	0.753907	0.999608
ENSSSCG00000003831	OMA1	OMA1 zinc metallopeptidase	67.3097	-0.0650994	0.659777	0.999608
ENSSSCG00000003832	TACSTD2	tumor associated calcium signal transducer 2	42.5359	0.0744285	0.737191	0.999608
ENSSSCG00000003833	DAB1	DAB adaptor protein 1	1257.44	-0.0002876	0.996629	0.999608
ENSSSCG00000003834	C8B	complement C8 beta chain	2.30988	-1.58554	0.0483919	0.999608
ENSSSCG00000003835	C8A	complement C8 alpha chain	0.922173	0.614011	0.5996	0.999608
ENSSSCG00000003843	PARS2	prolyl-tRNA synthetase 2, mitochondrial	113.662	-0.193771	0.0580323	0.999608
ENSSSCG00000003844	TTC4	tetratricopeptide repeat domain 4	206.34	0.104528	0.186133	0.999608
ENSSSCG00000003848	LRP8	LDL receptor related protein 8	451.936	0.0684033	0.661627	0.999608
ENSSSCG00000003849	MAGOH	mago homolog, exon junction complex subunit	263.853	0.0950231	0.310305	0.999608
ENSSSCG00000003850	CZIB	CXXC motif containing zinc binding protein	1279.34	0.125066	0.290169	0.999608
ENSSSCG00000003851	CPT2	carnitine palmitoyltransferase 2	175.496	-0.150374	0.140668	0.999608
ENSSSCG00000003852	SLC1A7	solute carrier family 1 member 7	37.4985	-0.0737414	0.628572	0.999608
ENSSSCG00000003854	ECHDC2	enoyl-CoA hydratase domain containing 2	71.4414	0.0387172	0.800904	0.999608
ENSSSCG00000003857	ZYG11B	zyg-11 family member B, cell cycle regulator	1552.5	0.0530437	0.45783	0.999608
ENSSSCG00000003859	TUT4	terminal uridylyl transferase 4	266.544	-0.0232808	0.799085	0.999608
ENSSSCG00000003861	ORC1	origin recognition complex subunit 1	147.87	-0.206684	0.369976	0.999608
ENSSSCG00000003862	CC2D1B	coiled-coil and C2 domain containing 1B	626.906	0.0254927	0.820264	0.999608
ENSSSCG00000003863	ZFYVE9	zinc finger FYVE-type containing 9	946.949	0.101891	0.190758	0.999608
ENSSSCG00000003867	TXNDC12	thioredoxin domain containing 12	658.417	0.12564	0.108775	0.999608
ENSSSCG00000003870	NRDC	nardilysin convertase	1089.94	-0.0267221	0.609786	0.999608
ENSSSCG00000003872	EPS15	epidermal growth factor receptor pathway substrate 15	3488.54	-0.00531826	0.940067	0.999608
ENSSSCG00000003875	TTC39A	tetratricopeptide repeat domain 39A	79.5669	0.0416004	0.756826	0.999608
ENSSSCG00000003876	CDKN2C	cyclin dependent kinase inhibitor 2C	214.827	-0.159726	0.211996	0.999608
ENSSSCG00000003877	FAF1	Fas associated factor 1	860.733	0.0621314	0.299809	0.999608
ENSSSCG00000003881	SPATA6	spermatogenesis associated 6	128.925	-0.00189709	0.992049	0.999608
ENSSSCG00000003882	SLC5A9	solute carrier family 5 member 9	0.346786	-1.57168	0.497927	0.999608
ENSSSCG00000003884	FOXE3	forkhead box E3	0.917875	-0.878798	0.498893	0.999608
ENSSSCG00000003885	CMPK1	cytidine/uridine monophosphate kinase 1	2200.1	0.0528605	0.291544	0.999608
ENSSSCG00000003888	STIL	STIL centriolar assembly protein	92.4845	0.00190823	0.991931	0.999608
ENSSSCG00000003891	CYP4A24	cytochrome P450 4A24	0.0911899	-0.529552	0.86545	0.999608
ENSSSCG00000003894	CYP4B1	cytochrome P450 4B1	0.398339	-0.742664	0.747251	0.999608
ENSSSCG00000003895	EFCAB14	EF-hand calcium binding domain 14	784.756	-0.131934	0.284649	0.999608
ENSSSCG00000003897	MOB3C	MOB kinase activator 3C	95.5654	-0.239732	0.0185285	0.999608
ENSSSCG00000003898	MKNK1	MAPK interacting serine/threonine kinase 1	342.562	0.0969719	0.15131	0.999608
ENSSSCG00000003900	DMBX1	diencephalon/mesencephalon homeobox 1	0.0504606	0.45532	0.884167	0.999608
ENSSSCG00000003901	FAAH	fatty acid amide hydrolase	1579.74	-0.00359777	0.978547	0.999608
ENSSSCG00000003904	LRRC41	leucine rich repeat containing 41	481.602	0.0762561	0.600322	0.999608
ENSSSCG00000003905	RAD54L	RAD54 like	53.9979	-0.262302	0.119876	0.999608
ENSSSCG00000003908	TSPAN1	tetraspanin 1	18.3098	-0.302875	0.312986	0.999608
ENSSSCG00000003913	MAST2	microtubule associated serine/threonine kinase 2	1878.09	0.109739	0.208647	0.999608
ENSSSCG00000003914	PRDX1	peroxiredoxin 1	2008.14	0.0169139	0.874061	0.999608
ENSSSCG00000003917	TESK2	testis associated actin remodelling kinase 2	143.034	-0.223764	0.18421	0.999608
ENSSSCG00000003918	TOE1	target of EGR1, exonuclease	129.154	0.128807	0.189438	0.999608
ENSSSCG00000003921	ZSWIM5	zinc finger SWIM-type containing 5	885.238	-0.0400353	0.782264	0.999608
ENSSSCG00000003922	UROD	uroporphyrinogen decarboxylase	1008.52	0.0825792	0.400488	0.999608
ENSSSCG00000003923	HECTD3	HECT domain E3 ubiquitin protein ligase 3	1569.87	0.0972908	0.184457	0.999608
ENSSSCG00000003926	BTBD19	BTB domain containing 19	115.985	-0.249863	0.121558	0.999608
ENSSSCG00000003928	PLK3	polo like kinase 3	331.66	-0.0229377	0.825615	0.999608
ENSSSCG00000003929	BEST4	bestrophin 4	6.89121	0.68678	0.16744	0.999608
ENSSSCG00000003930	RPS8	ribosomal protein S8	12511.8	0.102126	0.296874	0.999608
ENSSSCG00000003931	KIF2C	kinesin family member 2C	81.7874	-0.0696843	0.608992	0.999608
ENSSSCG00000003940	HYI	hydroxypyruvate isomerase (putative)	537.905	0.0339626	0.738373	0.999608
ENSSSCG00000003941	SZT2	SZT2 subunit of KICSTOR complex	376.254	0.0114066	0.938585	0.999608
ENSSSCG00000003943	MED8	mediator complex subunit 8	727.799	0.0549822	0.365317	0.999608
ENSSSCG00000003949	CDC20	cell division cycle 20	115.328	0.0431766	0.79304	0.999608
ENSSSCG00000003950	TIE1	tyrosine kinase with immunoglobulin like and EGF like domains 1	436.554	-0.0241385	0.815524	0.999608
ENSSSCG00000003951	C1orf210	chromosome 6 C1orf210 homolog	24.6179	-0.0542104	0.821252	0.999608
ENSSSCG00000003954	FAM183A	family with sequence similarity 183 member A	67.0623	0.0274636	0.880464	0.999608
ENSSSCG00000003964	PPIH	peptidylprolyl isomerase H	507.371	-0.0359887	0.568923	0.999608
ENSSSCG00000003966	PPCS	phosphopantothenoylcysteine synthetase	576.075	-0.179568	0.0454839	0.999608
ENSSSCG00000003967	ZMYND12	zinc finger MYND-type containing 12	39.0956	-0.454308	0.0892025	0.999608
ENSSSCG00000003968	RIMKLA	ribosomal modification protein rimK like family member A	161.964	0.099965	0.503844	0.999608
ENSSSCG00000003970	GUCA2B	guanylate cyclase activator 2B	3.7365	0.421344	0.496861	0.999608
ENSSSCG00000003971	SCMH1	Scm polycomb group protein homolog 1	502.229	0.0503222	0.488204	0.999608
ENSSSCG00000003972	SLFNL1	schlafen like 1	69.3364	-0.129189	0.538036	0.999608
ENSSSCG00000003973	CTPS1	CTP synthase 1	790.236	0.140114	0.0471148	0.999608
ENSSSCG00000003975	KCNQ4	potassium voltage-gated channel subfamily Q member 4	388.206	-0.281523	0.34023	0.999608
ENSSSCG00000003976	NFYC	nuclear transcription factor Y subunit gamma	1732.3	0.054408	0.410013	0.999608
ENSSSCG00000003979	ZNF684	zinc finger protein 684	97.8145	0.051814	0.624292	0.999608
ENSSSCG00000003980	EXO5	exonuclease 5	684.113	0.0732209	0.0997604	0.999608
ENSSSCG00000003981	ZFP69B	zinc finger protein 643	939.481	0.0421811	0.590732	0.999608
ENSSSCG00000003995	ZNF606	zinc finger protein 606	760.158	-0.0386127	0.547338	0.999608
ENSSSCG00000003998	ZNF274	neurotrophin receptor-interacting factor homolog	141.438	0.00955222	0.929256	0.999608
ENSSSCG00000004002	RPS5	ribosomal protein S5	5079.34	0.0574053	0.570541	0.999608
ENSSSCG00000004004	ZNF584	zinc finger protein 584	149.572	0.0817827	0.398451	0.999608
ENSSSCG00000004009	TCTE3	t-complex-associated-testis-expressed 3	5.23619	0.232329	0.64915	0.999608
ENSSSCG00000004010	ERMARD	ER membrane associated RNA degradation	545.043	-0.0127446	0.885002	0.999608
ENSSSCG00000004012	THBS2	thrombospondin 2	322.135	-0.0749578	0.382172	0.999608
ENSSSCG00000004013	SMOC2	SPARC related modular calcium binding 2	15.782	-0.467708	0.212444	0.999608
ENSSSCG00000004018	AFDN	afadin, adherens junction formation factor	1870.17	-0.0443571	0.475024	0.999608
ENSSSCG00000004020	SFT2D1	SFT2 domain containing 1	754.238	-0.124268	0.272079	0.999608
ENSSSCG00000004022	RPS6KA2	ribosomal protein S6 kinase A2	1326	0.00114026	0.991795	0.999608
ENSSSCG00000004023	FGFR1OP	FGFR1 oncogene partner	658.817	0.0633804	0.380115	0.999608
ENSSSCG00000004027	PDE10A	phosphodiesterase 10A	141.068	-0.0172692	0.930302	0.999608
ENSSSCG00000004029	QKI	QKI, KH domain containing RNA binding	11044.9	-0.192497	0.0992657	0.999608
ENSSSCG00000004032	PRKN	parkin RBR E3 ubiquitin protein ligase	123.781	0.0133574	0.938944	0.999608
ENSSSCG00000004033	AGPAT4	1-acylglycerol-3-phosphate O-acyltransferase 4	1272.03	0.0185079	0.820315	0.999608
ENSSSCG00000004037	MAP3K4	mitogen-activated protein kinase kinase kinase 4	885.978	0.0520145	0.386446	0.999608
ENSSSCG00000004038	PLG	plasminogen	5.01302	-0.218013	0.638931	0.999608
ENSSSCG00000004039	SLC22A3	solute carrier family 22 member 3	30.0594	-0.0699463	0.773115	0.999608
ENSSSCG00000004040	SLC22A2	solute carrier family 22 member 2	27.6637	-0.297331	0.33591	0.999608
ENSSSCG00000004041	SLC22A1	solute carrier family 22 member 1	1.03356	-1.04224	0.341975	0.999608
ENSSSCG00000004044	IGF2R	insulin like growth factor 2 receptor	868.749	0.0714919	0.368043	0.999608
ENSSSCG00000004045	MAS1	MAS1 proto-oncogene, G protein-coupled receptor	258.705	0.185579	0.286005	0.999608
ENSSSCG00000004046	PNLDC1	PARN like, ribonuclease domain containing 1	17.5143	-0.0689545	0.832092	0.999608
ENSSSCG00000004047	MRPL18	mitochondrial ribosomal protein L18	947.861	0.0377687	0.665299	0.999608
ENSSSCG00000004048	TCP1	t-complex 1	710.054	0.118717	0.460718	0.999608
ENSSSCG00000004049	ACAT2	acetyl-CoA acetyltransferase 2	1968.5	0.0362686	0.78519	0.999608
ENSSSCG00000004050	WTAP	WT1 associated protein	1290.32	0.0184795	0.757131	0.999608
ENSSSCG00000004052	FNDC1	fibronectin type III domain containing 1	138.745	-0.453034	0.0226944	0.999608
ENSSSCG00000004053	TAGAP	T cell activation RhoGTPase activating protein	175.434	-0.116258	0.50469	0.999608
ENSSSCG00000004055	RSPH3	radial spoke head 3	109.036	0.168052	0.481825	0.999608
ENSSSCG00000004057	SYTL3	synaptotagmin like 3	25.1346	0.0186714	0.951837	0.999608
ENSSSCG00000004058	EZR	ezrin	2130.63	-0.0591705	0.439367	0.999608
ENSSSCG00000004063	TMEM242	transmembrane protein 242	480.714	-0.00710901	0.893643	0.999608
ENSSSCG00000004064	ARID1B	AT-rich interaction domain 1B	734.935	-0.00985923	0.830035	0.999608
ENSSSCG00000004065	TIAM2	TIAM Rac1 associated GEF 2	112.563	-0.187663	0.333899	0.999608
ENSSSCG00000004068	NOX3	NADPH oxidase 3	0.0893097	-0.311797	0.92053	0.999608
ENSSSCG00000004070	SCAF8	SR-related CTD associated factor 8	655.396	-0.0523088	0.309112	0.999608
ENSSSCG00000004071	CNKSR3	CNKSR family member 3	142.353	0.0246827	0.886819	0.999608
ENSSSCG00000004074	OPRM1	opioid receptor mu 1	5.48907	0.191532	0.620357	0.999608
ENSSSCG00000004075	RGS17	regulator of G protein signaling 17	172.216	0.0133174	0.949791	0.999608
ENSSSCG00000004076	MTRF1L	mitochondrial translational release factor 1 like	256.215	0.127751	0.150534	0.999608
ENSSSCG00000004077	FBXO5	F-box protein 5	33.2176	-0.276016	0.181138	0.999608
ENSSSCG00000004078	VIP	vasoactive intestinal peptide	302.568	0.0553744	0.795386	0.999608
ENSSSCG00000004087	CCDC170	coiled-coil domain containing 170	195.008	0.0158909	0.881194	0.999608
ENSSSCG00000004088	ARMT1	acidic residue methyltransferase 1	460.758	0.171512	0.0172035	0.999608
ENSSSCG00000004089	RMND1	required for meiotic nuclear division 1 homolog	248.516	-0.0812253	0.37329	0.999608
ENSSSCG00000004090	ZBTB2	zinc finger and BTB domain containing 2	178.621	0.0188561	0.837007	0.999608
ENSSSCG00000004092	MTHFD1L	methylenetetrahydrofolate dehydrogenase (NADP+ dependent) 1 like	913.93	0.263324	0.0507535	0.999608
ENSSSCG00000004093	IYD	iodotyrosine deiodinase	2.04331	0.679806	0.360005	0.999608
ENSSSCG00000004094	PPP1R14C	protein phosphatase 1 regulatory inhibitor subunit 14C	836.184	0.0870092	0.300614	0.999608
ENSSSCG00000004101	LRP11	LDL receptor related protein 11	1585.63	0.0517071	0.696279	0.999608
ENSSSCG00000004103	PCMT1	protein-L-isoaspartate (D-aspartate) O-methyltransferase	4130.02	0.107608	0.0735614	0.999608
ENSSSCG00000004104	KATNA1	katanin catalytic subunit A1	202.401	0.15418	0.0692017	0.999608
ENSSSCG00000004105	NUP43	nucleoporin 43	262.665	0.0795416	0.380818	0.999608
ENSSSCG00000004106	LATS1	large tumor suppressor kinase 1	701.338	-0.0488973	0.497165	0.999608
ENSSSCG00000004109	ZC3H12D	zinc finger CCCH-type containing 12D	11.7179	0.263673	0.367532	0.999608
ENSSSCG00000004110	TAB2	TGF-beta activated kinase 1 (MAP3K7) binding protein 2	806.091	-0.101862	0.139263	0.999608
ENSSSCG00000004113	STXBP5	syntaxin binding protein 5	699.296	0.000624777	0.994768	0.999608
ENSSSCG00000004114	RAB32	RAB32, member RAS oncogene family	228.766	-0.159439	0.117056	0.999608
ENSSSCG00000004119	GRM1	glutamate metabotropic receptor 1	464.061	0.0899405	0.200376	0.999608
ENSSSCG00000004120	SHPRH	SNF2 histone linker PHD RING helicase	264.094	-0.105965	0.271499	0.999608
[truncated: 14,682 more rows]
